# Supplementary material for: Genetic variation in TERT modifies the risk of hepatocellular carcinoma in alcohol-related cirrhosis: results from a genome-wide case-control study
Source: PubMed Central journal article supplement (PMC9872243; doi:10.1136/gutjnl-2022-327196), 2022-07-04
Supplement: gutjnl-2022-327196supp001.pdf [file gutjnl-2022-327196supp001.pdf]

# Supplementary information

## SUPPLEMENTARY METHODS A

### Patient cohorts

Patients with alcohol-related cirrhosis referred to university centres in Germany (Dresden, Bonn, Rostock, Heidelberg, Munich, Leipzig, Halle, Homburg, Hannover, Hamburg, Kiel, Magdeburg, Frankfurt), Switzerland (Berne, Zürich, Lausanne), Austria (Salzburg/Oberndorf, Graz, Vienna), United Kingdom (London and UK Biobank), and Italy (Milan), were included and assigned to respective groups, as detailed in Table 1.

### Ethics

The study protocol was approved by the ethics committees of the participating institutions; all included subjects provided written informed consent prior to inclusion into the study.

### Germany / Switzerland / Austria Alcohol Cohort (Discovery cohort)

The diagnosis of alcohol-related cirrhosis was established as previously described [1]. In a substantial fraction of subjects included, transient elastography was performed to include patients with a liver stiffness measurement (Fibroscan, Echosens, Paris) of above 19 kPa (IQR<20%) indicating cirrhosis as per current consensus [2]. Morbidly obese (body mass index  $\geq 45\text{kg/m}^2$ ) patients were excluded. The diagnosis of HCC was established as previously described [3], [4] and based on histological examination of tumour tissue or typical evidence on magnetic resonance imaging, using liver-specific contrast enhancement of focal lesions that were hypervascular in the arterial phase with a fast wash-out in the portal venous or delayed phases, and revealed a serum-alpha-fetoprotein level of  $>200\text{ng/ml}$  [5], [6].

## SUPPLEMENTARY METHODS B

### ArC nested case-control dataset:

We created a nested case control study for ArC HCC using data from the UKB resource as described in the main text.

Participants were excluded from the case-control study for any of the following reasons

- non-White British ancestry (inferred via UKB field ID:22006);
- poor quality genetic sample (defined by UKB field ID: 22027);

- Second or first-degree relations to another participant in the case-control dataset (inferred via a kinship coefficient  $\geq 0.121$ ).

Individual-level data for approximately 6.2 million genetic variants were available in the version 3 UKB imputed genetic data sets, after exclusion of variants with (a) minor allele frequency  $< 1\%$ , (b) gross deviation from the Hardy-Weinberg equilibrium ( $P < 1.0 \times 10^{-10}$ ), (c) imputation information score  $< 0.8$ , (d) high level of missing data ( $> 10\%$ ), and (e) non-biallelic or duplicate variants.

### **Evidence for alcohol-related cirrhosis was determined as:**

A hospital admission for alcohol cirrhosis of liver.

- K70.3 (Alcoholic cirrhosis of liver)

We also excluded Individuals with other liver disease aetiologies (viral hepatitis, hemochromatosis and autoimmune liver disease).

Viral hepatitis and autoimmune liver disease were defined as the presence of one or more of the following ICD codes in any diagnostic position within an in-patient hospital admission record

- K754 (Autoimmune hepatitis)
- K743 (primary biliary cirrhosis)
- K744 (secondary biliary cirrhosis)
- K745 (biliary cirrhosis, unspecified)
- B16 (acute hepatitis B)
- B17 (other acute viral hepatitis)
- B18 (Chronic viral hepatitis)
- B19 (unspecified viral hepatitis)

Hemochromatosis was defined as homozygous carriage of the C282Y variant (rs18005762), as determined from the version 3 UKB genetic dataset (downloaded May 2019).

These nested case-control data were then pooled with additional patients recruited from the Centre for Hepatology at the Royal Free Hospital, London (N=306). These patients were similarly of self-reported English, Scottish, Welsh or Irish descent, and had a history of prolonged alcohol misuse as described previously [1]. All were examined by two experienced, senior clinicians for signs of liver injury. The diagnosis of HCC was based on histological examination of tumour tissue. Histological examination was undertaken, whenever possible, of liver biopsy material obtained by

percutaneous, ultrasound-guided or transjugular routes or else of explant or postmortem liver tissue. Blood was screened for antibodies to hepatitis B, hepatitis C, mitochondrial, nuclear, smooth muscle, liver and kidney autoantibodies; iron, total iron-binding capacity and ferritin; copper and caeruloplasmin;  $\alpha$ 1 antitrypsin and tissue transglutaminase. Patients were excluded if they had any other potential cause of liver injury such as chronic viral hepatitis or autoimmune liver disease; genetic haemochromatosis; Wilson's disease; alpha-1 antitrypsin deficiency or celiac disease. Patients with ArC (with no evidence of HCC) were diagnosed on the basis of a history of alcohol dependence and histological examination of liver tissue or on the basis of compatible historical, clinical, laboratory, radiological and endoscopic features.

### **University of Bonn (Germany) Alcohol Cohort (Replication cohort 2)**

The replication cohorts included 238 Caucasian patients with ArC (42 with HCC) from the Hepatology/Gastroenterology department of the University Bonn, as detailed previously [7].

### **University of Milan (Italy) Alcohol Cohort (Replication cohort 3)**

The replication cohorts included 72 Caucasian patients with ArC (36 with HCC) from the department of Pathophysiology and Transplantation of the State University of Milan.

## **SUPPLEMENTARY METHODS C**

### ***Validation cohorts***

For post-hoc risk assessment additional patients with alcohol misuse, but without cirrhosis were included. Non-cirrhotic control patients (n=1080) with alcohol misuse but no evidence of significant liver injury were recruited at psychiatry centers specialized in addiction medicine in Regensburg, Munich and Mannheim (all in Germany) as described, in detail, previously [1]. In brief, patients had a background of alcohol consumption of at least 60 g/d for women and 80 g/d for men for  $\geq 10$  years, all patients received a diagnosis of alcohol dependence (according to DSM-IV criteria). None had historical, clinical or laboratory evidence of liver disease, and its absence was confirmed either by a liver stiffness measurement (Fibroscan, Echosens, Paris) of below 6 kPa (IQR<20%) or by the absence of histological liver damage. These patients were then pooled together with additional non-cirrhotic patients with alcohol abuse (n=99) recruited from the Salem Medical Center, Heidelberg as described, in detail, previously [8].

Additional, non-cirrhosis control patients (n=341) recruited from the Centre for Hepatology at the Royal Free Hospital, London were diagnosed on the basis of a history of alcohol dependence and the absence of liver injury on histology or the absence of historical, clinical, radiological or

endoscopic features suggestive of significant liver injury either at presentation or during prolonged follow-up. All patients underwent abdominal ultrasound and/or abdominal computed tomography/magnetic resonance imaging, as indicated. All underwent routine upper gastrointestinal endoscopy.

## SUPPLEMENTARY METHODS D

### DNA preparation and genotyping

#### Discovery cohort

Genomic DNA was extracted from peripheral blood samples according to standard procedures, quantified using the PicoGreen dsDNA Assay kit (Invitrogen) and normalized to a concentration of 50 ng/ $\mu$ l. Genotyping on Illumina BeadChip arrays was performed according to the manufacturer's instructions, as described before [1].

For the present study, >665,000 SNPs (662,835 with assigned rs-numbers) were genotyped in a clinical case-control panel of 1910 patients with ArC from Germany and Switzerland with a total genotyping rate of 0.998. The discovery GWAS included 1,066 patients with ArC and HCC and 844 patients with ArC with no evidence of HCC from Germany and Switzerland (Table 1) genotyped on the Infinium®Global Screening Array (GSA) (version 24v2, Illumina). Samples were called using GenomeStudio (v2.0, Illumina), exported to Plink file format and imputed as described below.

#### Genotype data quality control

In all data sets, individuals with genotyping success <97%, outlying autosomal heterozygosity (more than 3 SD from the mean) or a kinship coefficient ( $p^{\wedge}$ ) <0.185 and those failing gender checks were excluded from analysis. Multidimensional scaling (MDS) analysis was performed on a cleaned, LD-pruned data set (indep-pairwise; excluding the human leukocyte antigen (HLA) region at chr. 6: 28,477,797–33,448,354; minor allele frequency >0.01, Hardy-Weinberg equilibrium  $P > 1 \times 10^{-6}$ , genotyping rate threshold for each marker >98% and genotyping rate threshold for each individual >97%) that was merged with HapMap Phase 3 data from 11 different populations. Individuals deviating by more than 3 SD from the median European MDS cluster were excluded as population outliers. All quality control filtering was performed using PLINK (v1.9).

### MDS plot of discovery cohort (non-European ancestry outlier removal)

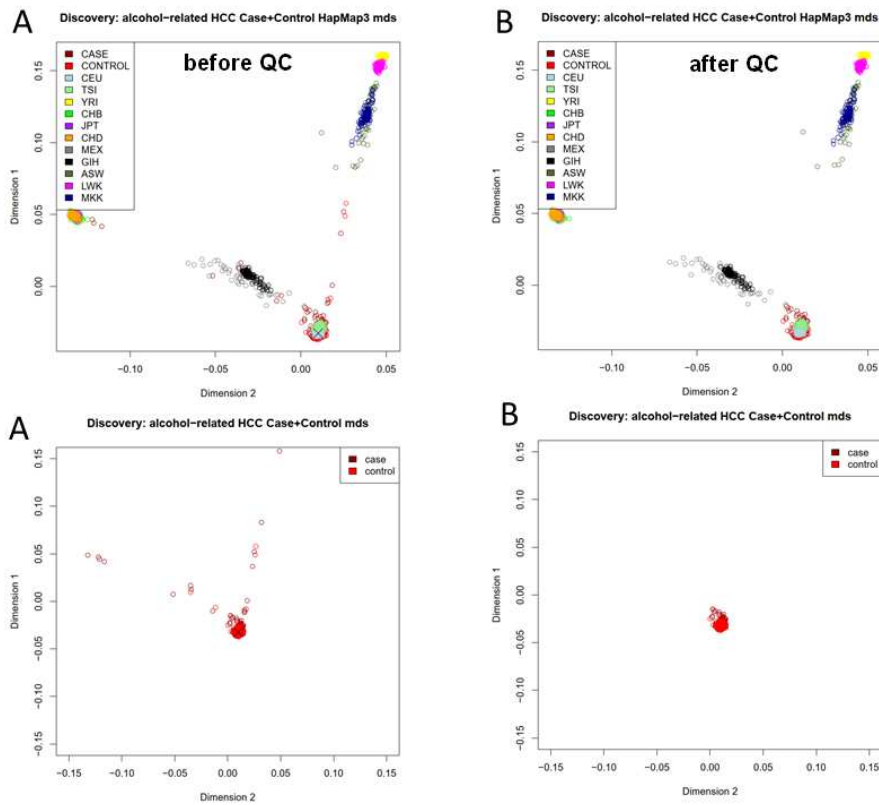

### MDS plot of United Kingdom replication cohort (non-European ancestry outlier removal)

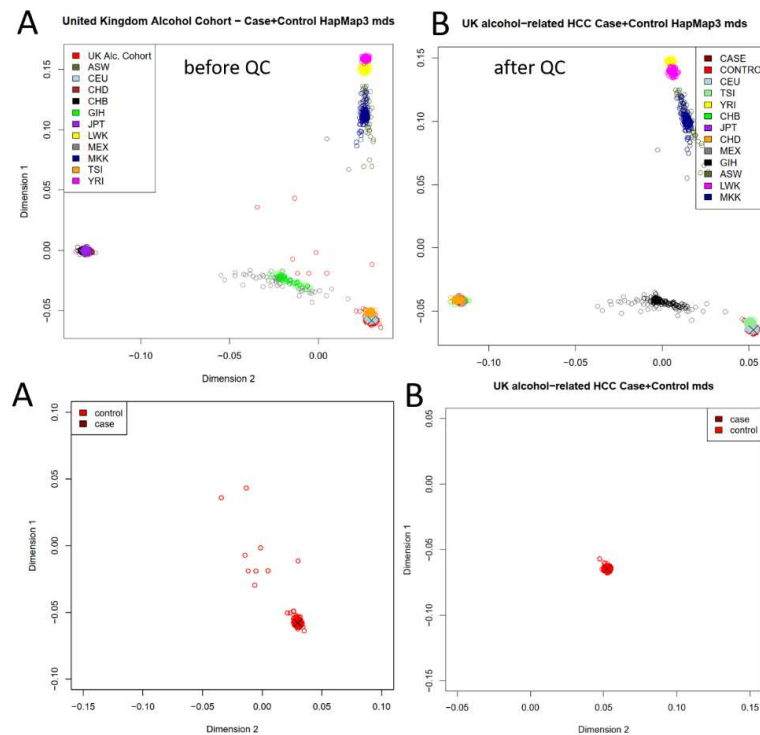

## Replication cohorts

Germany:

Replication samples from Germany (cohort 2) were genotyped on the OmniExpress array (version 24v1-0a), exported to Plink format and imputed as described below.

Italy:

Replication samples from Italy (cohort 3) were genotyped on the Infinium®Global Screening Array (GSA) (version 24v2, Illumina), exported to Plink format and imputed as described below.

United Kingdom:

In total, 652 patients with a history of prolonged alcohol misuse (306 patients with alcohol-related cirrhosis and 346 non-cirrhotic controls from the UK) were genotyped using the OmniExpress array (version 24v1-0a, Illumina) as described previously [1]. Samples were called using GenomeStudio (v2.0, Illumina). Genotype data was then imputed to HRC reference panel as described below. For replication of lead variants, imputed VCF format probability data was exported to Plink format and merged with Plink format genotype data from 606 patients from the United Kingdom (UK) Biobank Resource based on data from the version 3 release. Imputed genotype data from 606 patients genotyped on the UK BiLEVE and the UK Biobank Axiom array were obtained from the UK Biobank Resource [9] (under application number 8764).

The merged data set was subjected to quality control procedures described below. Association tests were performed on the merged data set on discrete genotypes.

The UK Biobank analysis was based on data from the version 3 release of the UKB imputed genetic data set. Participants were excluded from the case-control study for any of the following: non-White British ancestry (inferred via UKB field ID:22006); poor quality genetic sample (defined by UKB field ID: 22027); Second or first-degree relations to another participant in the case-control dataset (inferred via a kinship coefficient  $\geq 0.121$ ). Individual-level data for approximately 6.2 million genetic variants were available in the version 3 UKB imputed genetic data sets, after exclusion of variants with (a) minor allele frequency  $< 1\%$ , (b) gross deviation from the Hardy-Weinberg equilibrium ( $P < 1.0 \times 10^{-10}$ ), (c) imputation information score  $< 0.8$ , (d) high level of missing data ( $> 10\%$ ), and (e) non-biallelic or duplicate variants.

## Validation samples

Control subjects drinking excessively but without evident alcohol-related liver disease (AM) were recruited at psychiatry centers specialized in addiction medicine in Regensburg, Munich and Mannheim (all in Germany). All patients received a diagnosis of alcohol dependence (according to DSM-IV criteria). These patients were genotyped on the HumanHap550 (n = 407), Human610Quad (n = 329) and Human660w-Quad (n = 383) Illumina BeadChip arrays. Individuals with genotyping success <97% were excluded from further analysis, as described in detail before [10]. To harmonize the German data sets, genotype probabilities were generated from signal intensity data for each array. Sample phasing and genotype imputation were performed using IMPUTE2 to the 1000 Genomes Project Phase 3 reference (October 2014 release). Expected genotypes were calculated from the genotype posterior probabilities using the software SNPTTEST (v2.5.6; snptest (ox.ac.uk) [11].

Additional 99 AM control subjects were recruited from the Salem Medical Center, Heidelberg and were genotyped on the Infinium® Global Screening Array (GSA) (version 24v2, Illumina), exported to Plink format and imputed as described below.

## SUPPLEMENTARY METHODS E

### Imputation and GWAS meta-analysis

Genotype imputation was performed with Minimac4 to the HRC r1.1 (hg19) reference panel using the Michigan Imputation Server [12], [13]. In total 7,946,762 variants with imputation  $r^2 > 0.3$ , MAF > 0.01 and HWE ( $P > 1 \times 10^{-6}$ ) were tested for association with HCC using linear regression on allele dosages adjusted for top 15 principal components of genetic ancestry. Quality filtered plink files from the discovery and replication cohorts were prepared for imputation to the Haplotype Reference Consortium reference panel (HRC.r1-1.GRCh37) using the “HRC-1000G-check-bim” tool (Version 4.3.0) [14]. Phasing and genotype imputation was performed using the Michigan Imputation Server [15]. After imputation 7,778,317 variants were available for the discovery GWAS, after exclusion of variants with a minor allele frequency < 0.01, deviation from Hardy-Weinberg equilibrium  $P < 1 \times 10^{-6}$  and imputation information score < 0.3.



## SUPPLEMENTARY METHODS F

### Replication analysis

In stage 2, the selected SNPs were validated in independent samples from the UK (n=860), Germany (n=238) and Italy (n=72). Study-specific  $\beta$  estimates and standard errors were derived from stage 2 samples and further analyzed using fixed-effect meta-analysis. Cochran's Q and I<sup>2</sup> statistics were employed to assess consistency of effect and to quantify heterogeneity between sample sets. Two criteria were required to demonstrate replication: a) P value <  $5.55 \times 10^{-3}$  (corresponding to P < 0.05 after Bonferroni correction for 9 tests); and b) consistency of allelic effect direction between discovery and replication samples. Four different multiplicative allelic models were analyzed: model (1) included the top 15 PCs, model (2) included sex, age and the top 15 PCs, model (3) included sex, age, BMI and the top 15 PCs and model (4) included age, sex, BMI, diabetes type 2 status and the top 15 PCs using Plink 2.0 for. Model 1 results were used in the primary replication analysis, model 2 results in the secondary replication analysis, model 3 and 4 estimates in *post-hoc* risk assessment (Suppl. Table 5).

### Additional replication analysis of *TERT* variants in population-based cohorts

#### FinnGen Biobank

FinnGen is a public–private partnership project, combining genotyping data from Finnish biobanks with electronic health record data derived from national health registries. Genome-wide association study (GWAS) summary statistics for more than 1,800 phenotypes/endpoints, including for primary liver cancer, have been publicly released.

This study utilized the latest R6 data released (autumn 2020) pertaining to a sample size of 260,405 individuals. Cases were individuals with a history/diagnosis of primary liver cancer (ICD-10: C22 and ICD-9: 155), while controls were all individuals without a diagnosis of primary liver cancer (excluding all other cancers), largely comprised of individuals without any preexisting liver disease. GWAS summary statistics relating specifically to HCC were not available.

#### United Kingdom Biobank

As UKB data were incorporated into the discovery analysis, further interrogation of liver cancer phenotypes from UKB does not constitute independent validation. However, for reference purposes, we calculated the association between variants in *TERT* and liver-related cancer at the level of the entire UKB population.

Associations with three specific phenotypes were assessed.

- 1) HCC (ICD 10: C22.0).
- 2) Intrahepatic bile duct cancer (ICD 10: C22.1)
- 3) All liver related neoplasms (ICD10: C22)

N.B. the latter phenotype was selected in order to align with data from the FinnGen cohort.

As with previous analyses, UKB participants were restricted to those of white British ancestry (UKB field ID: 22006) and excluded those with a poor-quality genetic sample (defined by UKB field ID: 22027); and excluded related participants (inferred by a kinship coefficient  $\geq 0.1$ ).

Cases were defined as participants with the selected ICD code(s) in a hospital admission, death, or cancer registration record, either before or after UKB enrollment. The control group comprised UKB participants who did not meet the above definition of a case. All analyses were adjusted for sex, age at UKB enrolment, and the top 5 principal components of genetic ancestry.

### **BioBank Japan**

BBJ is a prospective genome biobank that collaboratively collected DNA and serum samples from 12 medical institutions in Japan, managed by the Institute of Medical Science, the University of Tokyo. BBJ has recruited approximately 260,000 patients, mainly of Japanese ancestry. All study participants had been diagnosed with one or more of 47 target diseases. RIKEN Center for Integrative Medical Sciences contributed to genotyping of the BBJ samples.

Cases were participants with a history of hepatic cancer, defined by cancer registration with HCC (ICD-10: **C22.0**, or ICD-9: **155.0**). The control group included all BBJ participants without a history of HCC, of which most individuals would have had no history of chronic liver disease.

### **Additional replication analysis of *TERT* variants**

In total, the STOP-HCV cirrhosis study comprises 1,059 patients with hepatitis C-related cirrhosis. Participants were recruited from 31 specialist liver clinics in the UK between January 2015 and July 2016[16]. Cirrhosis was defined through histologic assessment, imaging, or a validated serum biomarker consistent with liver cirrhosis (i.e., aspartate aminotransferase [AST]-to-platelet ratio index  $>2$ , FibroTest  $>0.73$ , or enhanced liver fibrosis score  $>10.48$ ). Blood specimens collected at enrollment were used to generate host-genotyping data through the Affymetrix UK Biobank array. Imputation was performed in March 2022 using the Topmed imputation server. Missing hard called

genotypes were filled from dosage information to obtain the Euclidean-nearest best-guess genotypes. To generate prospective phenotype data, participants from England have been linked to national hospital admission, cancer registrations, and mortality data, in a similar way to the UKB.

The present analysis was restricted to participants from England to ensure complete data on hospital admissions, cancer registrations, and mortality. No restrictions were made for ethnicity/European ancestry. Participants with missing genotype data for the lead variant rs2242652 were also excluded. As with the UKB, cases were defined on the basis of an in-patient hospital admission, death, or cancer registration indicating HCC (ICD-10: C22.0; ICD-9: 155.0) either before or after study enrollment. Controls were all participants without a history of HCC. Allelic odds ratios were calculated from  $2 \times 2$  tables on allele counts. Significance was calculated as one degree of freedom Chi-squared test.

### **Association with non-liver related cancers (pleiotropy analysis)**

The association of *TERT* variant rs2242652 with non-liver related cancers were tested in the UKB and FinnGen population-based cohorts. Specifically, we quantified rs2242652's and rs10069690's association individually with each of the 10 most frequent non-liver related cancers observed in the UKB population: C43 Malignant melanoma of skin; C44 Other malignant neoplasms of skin; C50 Malignant neoplasm of breast; C61 Malignant neoplasm of prostate; C18 Malignant neoplasm of colon; C20 Malignant neoplasm of rectum; C34 Malignant neoplasm of bronchus and lung; C67 Malignant neoplasm of bladder; C54 Malignant neoplasm of corpus uteri; C85 Other and unspecified types of non-Hodgkin's lymphoma. As before, each cancer phenotype was defined using data from: 1) hospital admissions; 2) mortality; and 3) cancer registries.

## **SUPPLEMENTARY METHODS G**

### **SNP Heritability Analysis**

The proportion of phenotypic variance explained by the additive genetic effect of common genome-wide significant SNPs ( $h^2_{\text{SNP}}$ : SNP heritability) was estimated by genome-based restricted maximum likelihood analysis using GCTA-GREML[17]. To obtain a SNP-based estimate of relatedness for each pair of individuals in the discovery GWAS cohort was obtained using imputed autosomal SNPs ( $N=7,585,576$ ) with  $\text{MAF} > 1\%$ ,  $P_{\text{HWE}} > 1 \times 10^{-6}$  and imputation  $r^2 > 0.3$ , were used to calculate the

genetic relationship matrix (GRM) between pairs of individuals. Missing hard called genotypes were filled from dosage information to obtain the Euclidean-nearest best-guess genotypes. The heritability (proportion of variance) explained by variants in the *PNPLA3* / *TM6SF2* / *TERT* LD regions that are associated with HCC in ArC with genome-wide significance were calculated using a two genetic variance components model was established using a set of  $n=2026$  variants from these regions as variance component 1 to allow the full genetic signal of these regions to be captured and the remaining >7.5 million GWAS variants (MAF >1%) as variance component 2, with sex, age and top 15 PCs as environment variance component. Obtained  $h^2$  estimates were then transformed to the liability scale valid for binary traits assuming HCC frequencies of 1%-2.5% in ArC using the formula implemented in GCTA.

$$h^2_{\text{liability}} = h^2_{\text{observed}} \frac{K(1-K)}{\varphi(\Phi^{-1}[K])^2} \frac{K(1-K)}{P(1-P)}$$

$K$  is the frequency of the binary trait in the population,  $P$  is the frequency of the binary trait in the observed sample. The denominator of the first fraction is the squared probability density function evaluated at the  $K$  quantile of the inverse cumulative density function of the standard normal distribution.

The proportion of the total SNP heritability due to variance component 1 (*PNPLA3* / *TM6SF2* / *TERT*

variants) was calculated  $\frac{h^2(\text{vc1})}{h^2(\text{vc0})+h^2(\text{vc1})} = \%(h^2)$ .

The three lead variants at the HCC risk loci (viz rs738409 in *PNPLA3*, rs58542926 in *TM6SF2* and rs2242652 in *TERT*) were included as covariates when estimating the additive genetic SNP heritability ( $h^2$  SNP) in the joint analysis in order to validate the heritability explained by component 1.

## SUPPLEMENTARY METHODS H

### United Kingdom Biobank cohort:

#### Liver fat content and telomere length data

Leukocyte telomere length was available for 471,172 participants in UKB (Field ID: 22191), whilst liver imaging fat content data was available for 8315 imaging sub-study participants (Field ID: 22436). The analysis was based on data from the version 3 release of the UKB imputed genetic data set. Participants were excluded from these analyses for any of the following reasons: non-White British ancestry (inferred via UKB field ID:22006); poor quality genetic sample (defined by UKB field ID: 22027); Second or first-degree relations to another participant in the case-control dataset (inferred via a kinship coefficient  $\geq 0.121$ ).

#### Data Availability

All data generated or analyzed during this study are included in this published article (and its supplementary information files).

#### REFERENCES:

- [1] S. Buch *et al.*, "A genome-wide association study confirms PNPLA3 and identifies TM6SF2 and MBOAT7 as risk loci for alcohol-related cirrhosis," *Nat Genet*, vol. 47, no. 12, pp. 1443–1448, Dec. 2015, doi: 10.1038/NG.3417.
- [2] E. Nguyen-Khac *et al.*, "Non-invasive diagnosis of liver fibrosis in patients with alcohol-related liver disease by transient elastography: an individual patient data meta-analysis," *Lancet Gastroenterol Hepatol*, vol. 3, no. 9, pp. 614–625, Sep. 2018, doi: 10.1016/S2468-1253(18)30124-9.
- [3] F. Stickel *et al.*, "Genetic variants in PNPLA3 and TM6SF2 predispose to the development of hepatocellular carcinoma in individuals with alcohol-related cirrhosis," *Am J Gastroenterol*, vol. 113, no. 10, pp. 1475–1483, Oct. 2018, doi: 10.1038/S41395-018-0041-8.
- [4] F. Stickel *et al.*, "Genetic Variation in HSD17B13 Reduces the Risk of Developing Cirrhosis and Hepatocellular Carcinoma in Alcohol Misusers," *Hepatology*, vol. 72, no. 1, pp. 88–102, Jul. 2020, doi: 10.1002/HEP.30996.
- [5] P. R. Galle *et al.*, "EASL Clinical Practice Guidelines: Management of hepatocellular carcinoma," *J Hepatol*, vol. 69, no. 1, pp. 182–236, Jul. 2018, doi: 10.1016/J.JHEP.2018.03.019.
- [6] J. M. Llovet *et al.*, "EASL-EORTC clinical practice guidelines: management of hepatocellular carcinoma," *J Hepatol*, vol. 56, no. 4, pp. 908–943, Apr. 2012, doi: 10.1016/J.JHEP.2011.12.001.
- [7] H. D. Nischalke *et al.*, "A common polymorphism in the NCAN gene is associated with hepatocellular carcinoma in alcoholic liver disease," *J Hepatol*, vol. 61, no. 5, pp. 1073–1079, 2014, doi: 10.1016/J.JHEP.2014.06.006.
- [8] S. Mueller *et al.*, "Inflammation-adapted liver stiffness values for improved fibrosis staging in patients with hepatitis C virus and alcoholic liver disease," *Liver International*, vol. 35, no. 12, pp. 2514–2521, Dec. 2015, doi: 10.1111/LIV.12904/SUPPINFO.
- [9] C. Bycroft *et al.*, "The UK Biobank resource with deep phenotyping and genomic data," *Nature* 2018 562:7726, vol. 562, no. 7726, pp. 203–209, Oct. 2018, doi: 10.1038/s41586-018-0579-z.
- [10] S. Buch *et al.*, "A genome-wide association scan identifies the hepatic cholesterol transporter ABCG8 as a susceptibility factor for human gallstone disease," *Nature Genetics*, vol. 39, no. 8, pp. 995–999, Aug. 2007, doi: 10.1038/ng2101.
- [11] J. Marchini and B. Howie, "Genotype imputation for genome-wide association studies," *Nature Reviews Genetics*, vol. 11, no. 7, pp. 499–511, 2010, doi: 10.1038/nrg2796.
- [12] S. McCarthy *et al.*, "A reference panel of 64,976 haplotypes for genotype imputation," *Nat Genet*, vol. 48, no. 10, pp. 1279–1283, Oct. 2016, doi: 10.1038/NG.3643.

- [13] S. Das *et al.*, "Next-generation genotype imputation service and methods," *Nat Genet*, vol. 48, no. 10, p. 1284, Oct. 2016, doi: 10.1038/NG.3656.
- [14] "McCarthy Tools." <https://www.well.ox.ac.uk/~wrayner/tools/> (accessed Nov. 09, 2021).
- [15] "Home - Michigan Imputation Server." <https://imputationserver.readthedocs.io/en/latest/> (accessed Nov. 09, 2021).
- [16] H. Innes *et al.*, "Comprehensive Comparative Analysis of Standard Validated, Genetic, and Novel Biomarkers to Enhance Prognostic Risk-Stratification in Patients With Hepatitis C Virus Cirrhosis," *Clinical and Translational Gastroenterology*, vol. 13, no. 3, p. e00462, Mar. 2022, doi: 10.14309/CTG.0000000000000462.
- [17] J. Yang, S. H. Lee, M. E. Goddard, and P. M. Visscher, "GCTA: a tool for genome-wide complex trait analysis," *Am J Hum Genet*, vol. 88, no. 1, pp. 76–82, Jan. 2011, doi: 10.1016/J.AJHG.2010.11.011.
- [18] E. Trépo *et al.*, "Common genetic variation in alcohol-related hepatocellular carcinoma: a case-control genome-wide association study," *Lancet Oncol*, vol. 23, no. 1, pp. 161–171, Jan. 2022, doi: 10.1016/S1470-2045(21)00603-3.
- [19] "hTERT single nucleotide polymorphism is associated with increased risks of hepatocellular carcinoma and tumor metastasis."  
[http://caod.oriprobe.com/articles/26058367/hTERT\\_single\\_nucleotide\\_polymorphism\\_is\\_associated\\_with\\_increased\\_risk.htm](http://caod.oriprobe.com/articles/26058367/hTERT_single_nucleotide_polymorphism_is_associated_with_increased_risk.htm) (accessed Apr. 28, 2022).
- [20] "[hTERT single nucleotide polymorphism is associated with increased risks of hepatocellular carcinoma and tumor metastasis] - PubMed." <https://pubmed.ncbi.nlm.nih.gov/21269955/> (accessed Apr. 28, 2022).

## SUPPLEMENTARY FIGURES

### **Supplementary Figure 1: QQ plot for Discovery GWAS 1 (pc adjusted)**

Quantile-quantile (QQ) plot: A  $\lambda$  of 1.03 was obtained for the primary analysis. Y axis observed  $-\log_{10}P$  values, Y axis expected  $-\log_{10}P$  values.

### **Supplementary Figure 2: Manhattan Plot of Discovery GWAS 2 (sex, age and pc adjusted, secondary analysis)**

Genome-wide association analysis of 1066 with ArC and HCC and 844 controls with ArC without HCC. GWAS analysis was adjusted for sex, age and top 15 principal components of genetic ancestry. P values are shown for SNPs that passed quality control. The genome-wide significance threshold ( $P=5\times 10^{-8}$ ) is shown as a solid line. The threshold for replication follow-up ( $P=1\times 10^{-5}$ ) is shown as a dashed line. The nearest gene is annotated for replicating loci. Variants with significance  $P<5\times 10^{-8}$  are highlighted in red, those with  $P<1\times 10^{-5}$  are highlighted in green.

### **Supplementary Figure 3: QQ plot of secondary GWAS 2: sex, age, PC adjusted**

Quantile-quantile (QQ) plot: A  $\lambda$  of 1.02 was obtained for the secondary analysis. Y axis observed  $-\log_{10}P$  values, Y axis expected  $-\log_{10}P$  values.

### **Supplementary Figure 4: Forest plot of confirmed HCC risk locus *PNPLA3* for discovery and replication cohorts**

Forrest plot showing the fixed-effects model ( $k=4$ ) meta-analysis of allelic ORs of the *PNPLA3* rs738409:G allele, for regression model 1 adjusted for top principal components.

### **Supplementary Figure 5: Forest plot of confirmed HCC risk locus *TM6SF2* for discovery and replication cohorts**

Forrest plot showing the fixed-effects model ( $k=4$ ) meta-analysis of allelic ORs of the *TM6SF2* rs58542926:T allele, for regression model 1 adjusted for top principal components.

### **Supplementary Figure 6: Forest plot of the novel HCC associated locus *TERT* for discovery and replication cohorts**

Forrest plot showing the fixed-effects model ( $k=4$ ) meta-analysis of allelic ORs of the *TERT* rs2242652:A allele, for regression model 1 adjusted for top principal components.

### **Supplementary Figure 7: Regional plot *TERT* (Discovery and Replication cohorts combined)**

Fine-mapping analysis of the *TERT* association signals. Annotated LD-Blocks are clusters of strong pairwise LD SNPs and reflect the LD pattern in the Discovery GWAS cohort. The lead association signal is located in intron 4 of the *TERT* gene (annotated on the reverse strand), located in LD block B-3 spanning from intron 4 to intron 2 of *TERT* (see Suppl. Table 12). The plot was generated using LocusZoom and R package "gpart".

### **Supplementary Figure 8: Regional plot *TM6SF2* (Discovery and Replication cohorts combined)**

Fine-mapping analysis of the *TM6SF2* association signals. The  $-\log_{10}$  (P values) are plotted against SNP genomic position based on NCBI Build 37. SNPs are colored to reflect correlation with the most significant SNP, with red denoting the highest LD ( $r^2>0.8$ ) with the lead SNP. Annotated LD-Blocks are clusters of strong pairwise LD SNPs and reflect the LD pattern in the Discovery GWAS cohort.

The lead association signal is located in exon 6 of the *TM6SF2* gene (annotated on the reverse strand). Estimated recombination rates from the 1000 Genomes Project (hg19/genomes March 2012 release, EUR population) are plotted in blue to reflect the local LD structure. Gene annotations were obtained from the UCSC Genome Browser.

**Supplementary Figure 9: Regional plot *PNPLA3* (Discovery and Replication cohorts combined)**

Fine-mapping analysis of the *PNPLA3* association signals. The  $-\log_{10}$  (P values) are plotted against SNP genomic position based on NCBI Build 37. SNPs are colored to reflect correlation with the most significant SNP, with red denoting the highest LD ( $r^2 > 0.8$ ) with the lead SNP. Annotated LD-Blocks are clusters of strong pairwise LD SNPs and reflect the LD pattern in the Discovery GWAS cohort. The lead association signal is located in exon 6 of the *PNPLA3* gene (annotated on the forward strand). Estimated recombination rates from the 1000 Genomes Project (hg19/genomes March 2012 release, EUR population) are plotted in blue to reflect the local LD structure. Gene annotations were obtained from the UCSC Genome Browser.

**Supplementary Figure 10: Forest plots for the associations of *TERT* lead variant rs2242652 [A allele] with the 10 most common cancer in UK Biobank and FinnGen biobank populated-based cohorts**

Forest plot showing association between lead variant rs2242652:A in *TERT* associated with HCC in ArC in the present study and the top 10 most frequent cancers observed in the UK Biobank and FinnGen cohort. In addition, the primary liver cancer phenotypes are highlighted in red. Associations are presented in terms of the LOR. An LOR of 0 indicates that the frequency of rs2242652:A is the same for cases as for controls. LORs were calculated using logistic regression under an additive genetic model.

**Supplementary Figure 11: The relative proportion of patients with HCC grouped by the number of risk alleles in *PNPLA3*, *TM6SF2*, and *TERT***

Percentage of patient with HCC in the discovery and validation cohorts stratified by the sum of crude risk alleles of *PNPLA3* rs738409 'G', *TM6SF2* rs58542926 'T' and *TERT* rs2242652 'G' carried by each patient, grouped into 3 categories.

**Supplementary Figure 12: Association between the number of risk alleles in *PNPLA3*, *TM6SF2* and *TERT* and alcohol-related hepatocellular carcinoma**

The association between the sum of crude risk alleles of *PNPLA3* rs738409 'G', *TM6SF2* rs58542926 'T' and *TERT* rs2242652 'G' carried by each patient and alcohol-related hepatocellular carcinoma in the discovery and validation cohorts.

**Supplementary Figure 13: HCC association results overlaid with leukocyte telomere length association results and regulation for gene *TERT***

GWAS association signals ( $-\log_{10}$  P values) of the combined of discovery and replication samples plotted for the entire *TERT* gene in comparison to association results ( $-\log_{10}$  P values) for leukocyte telomere length observed in the total European UK-Biobank population. Annotated LD-Blocks reflect the LD pattern in the discovery GWAS cohort. The lead association signal is located in intron 4 of the *TERT* gene (annotated on the reverse strand), located in LD block B-3 spanning from intron 4



to intron 2 of *TERT*. Strongest association signals for leukocyte telomere length are also located to LD block B-3. (for further details see Suppl. Table 12). The plot was generated using Ensembl.

Supplementary Figure 1: QQ plot for Discovery GWAS 1 (PC adjusted)

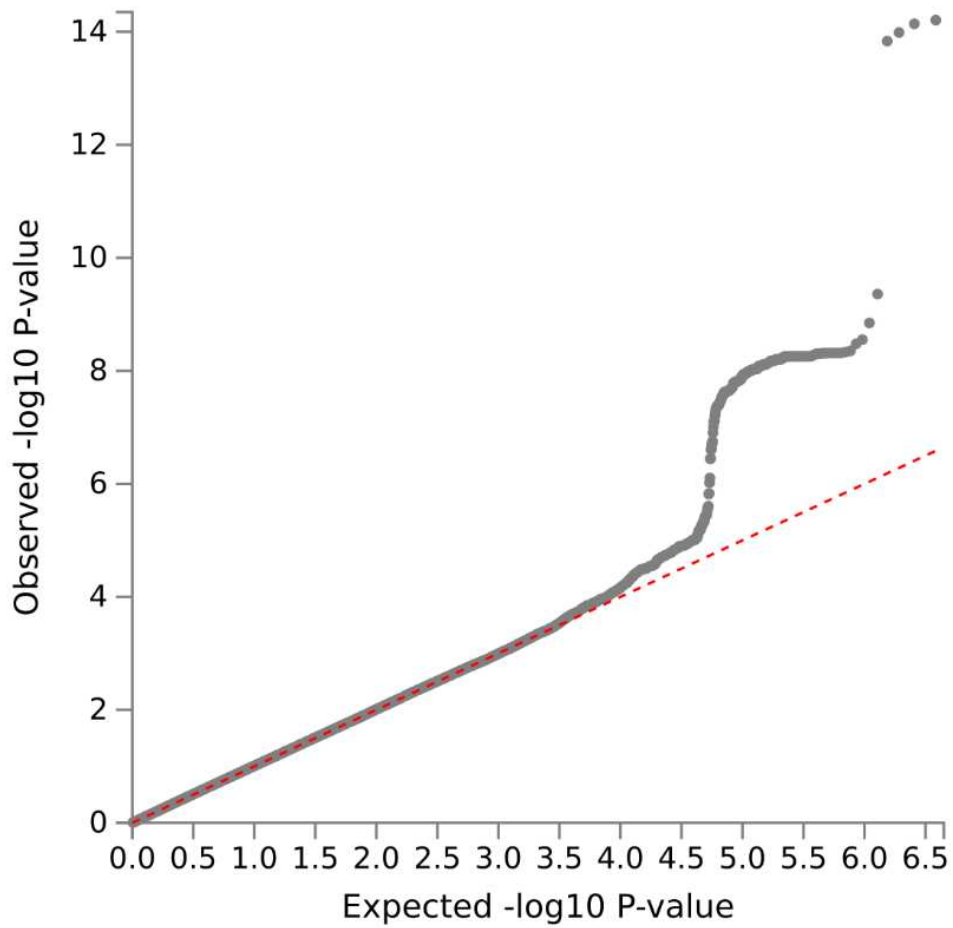

Supplementary Figure 2: Manhattan Plot of Discovery GWAS 2 (sex, age and PC adjusted)

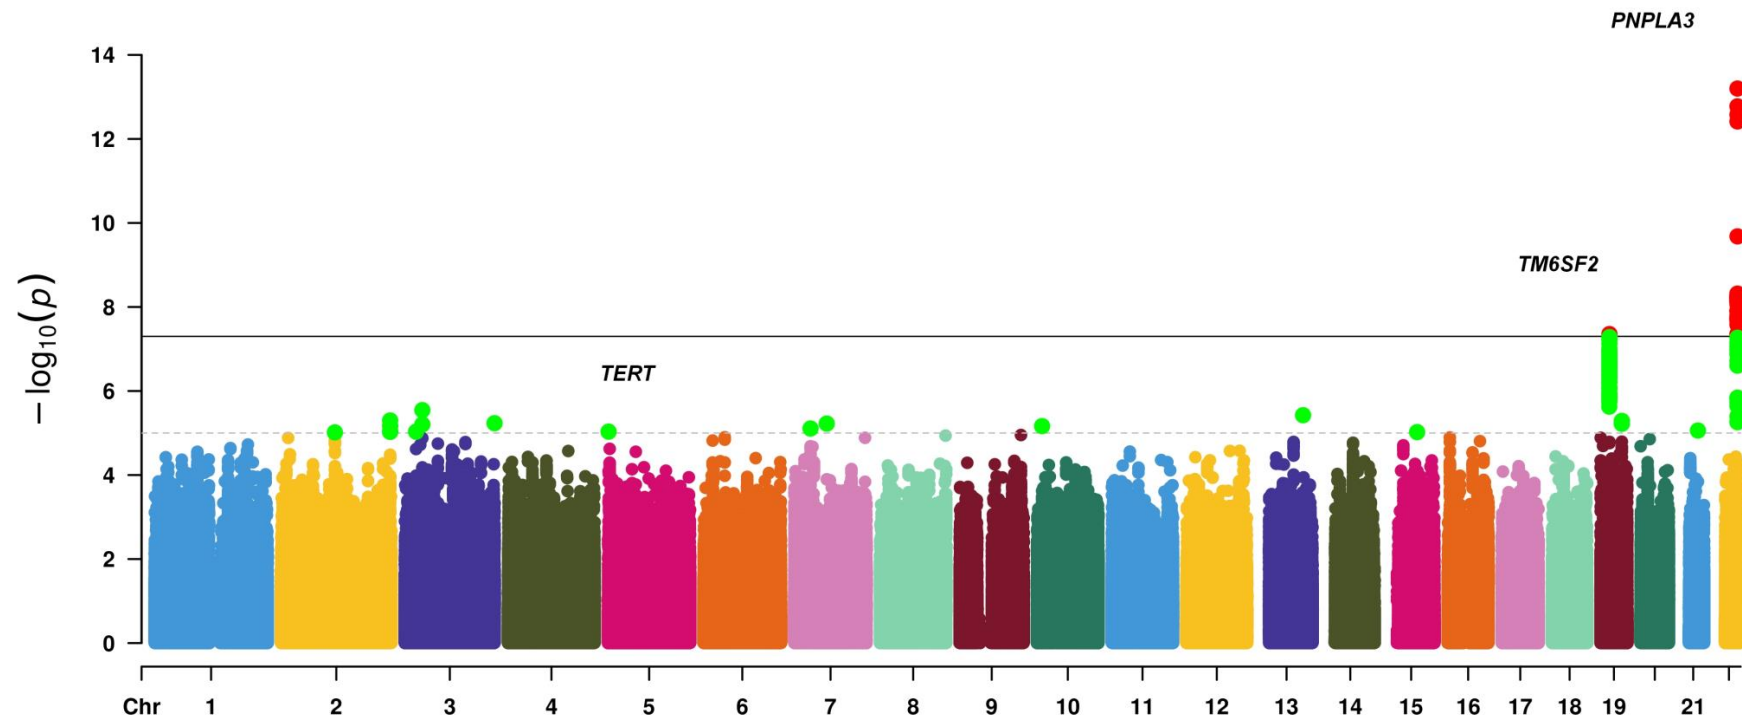

**Supplementary Figure 3: QQ plot of secondary GWAS 2 (sex, age and PC adjusted)**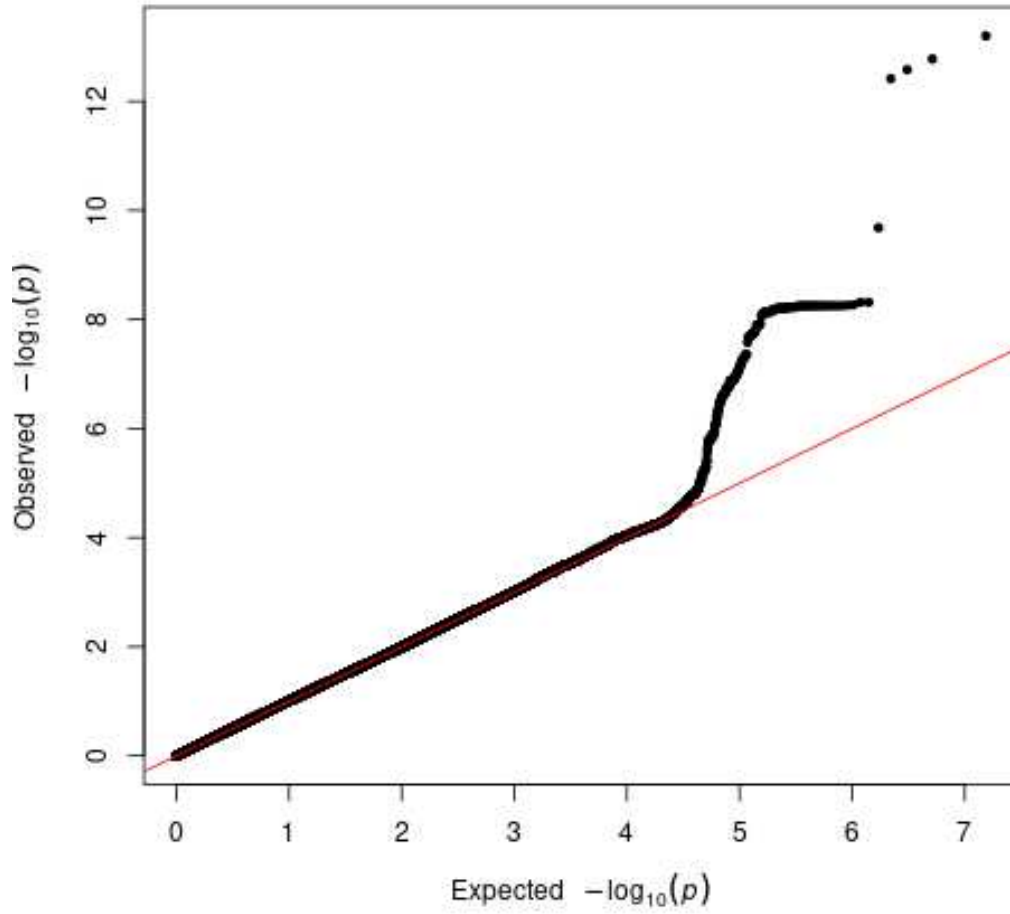

### Supplementary Figure 4: Forest plot of confirmed HCC risk locus *PNPLA3* for discovery and replication cohorts

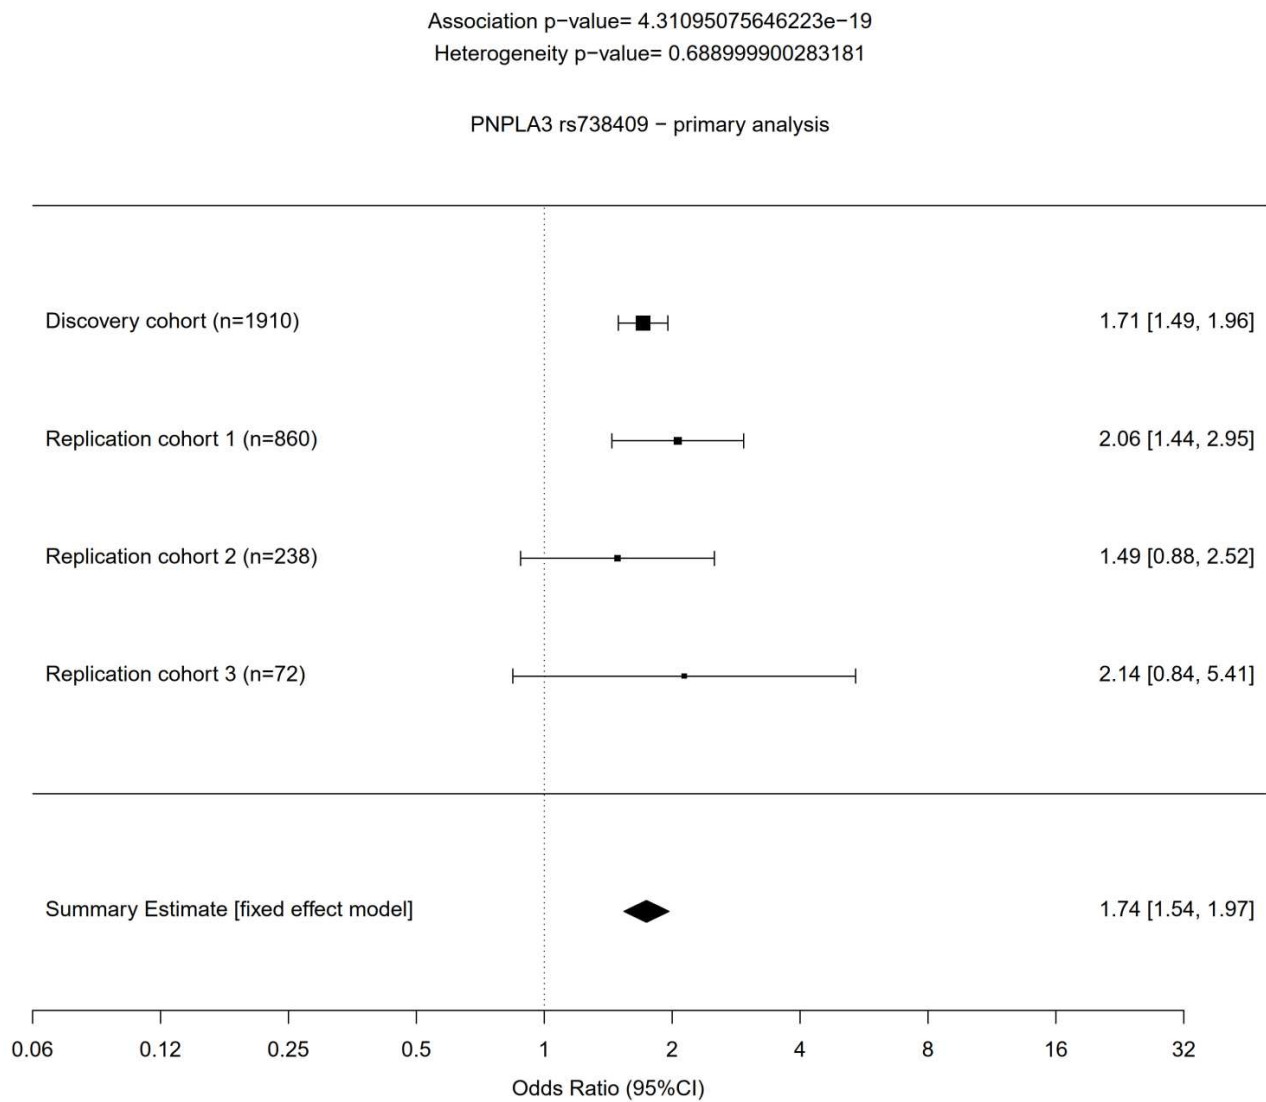

**Supplementary Figure 5: Forest plot of confirmed HCC risk locus *TM6SF2* for discovery and replication cohorts**

Association p-value= 1.00410616399898e-12

Heterogeneity p-value= 0.151983721771805

TM6SF2 rs58542926 – primary analysis

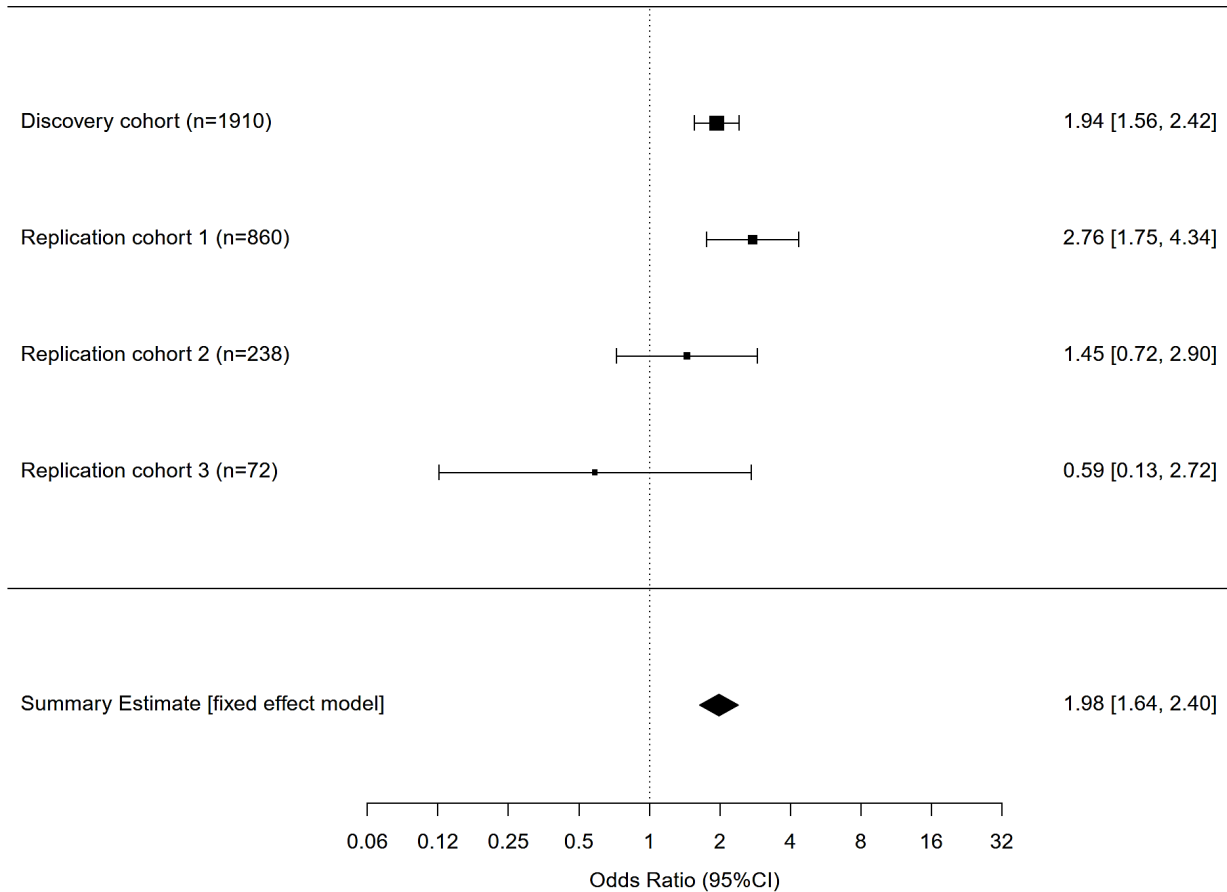

**Supplementary Figure 6: Forest plot of the novel HCC associated locus rs2242652:A in *TERT* for discovery and replication cohorts**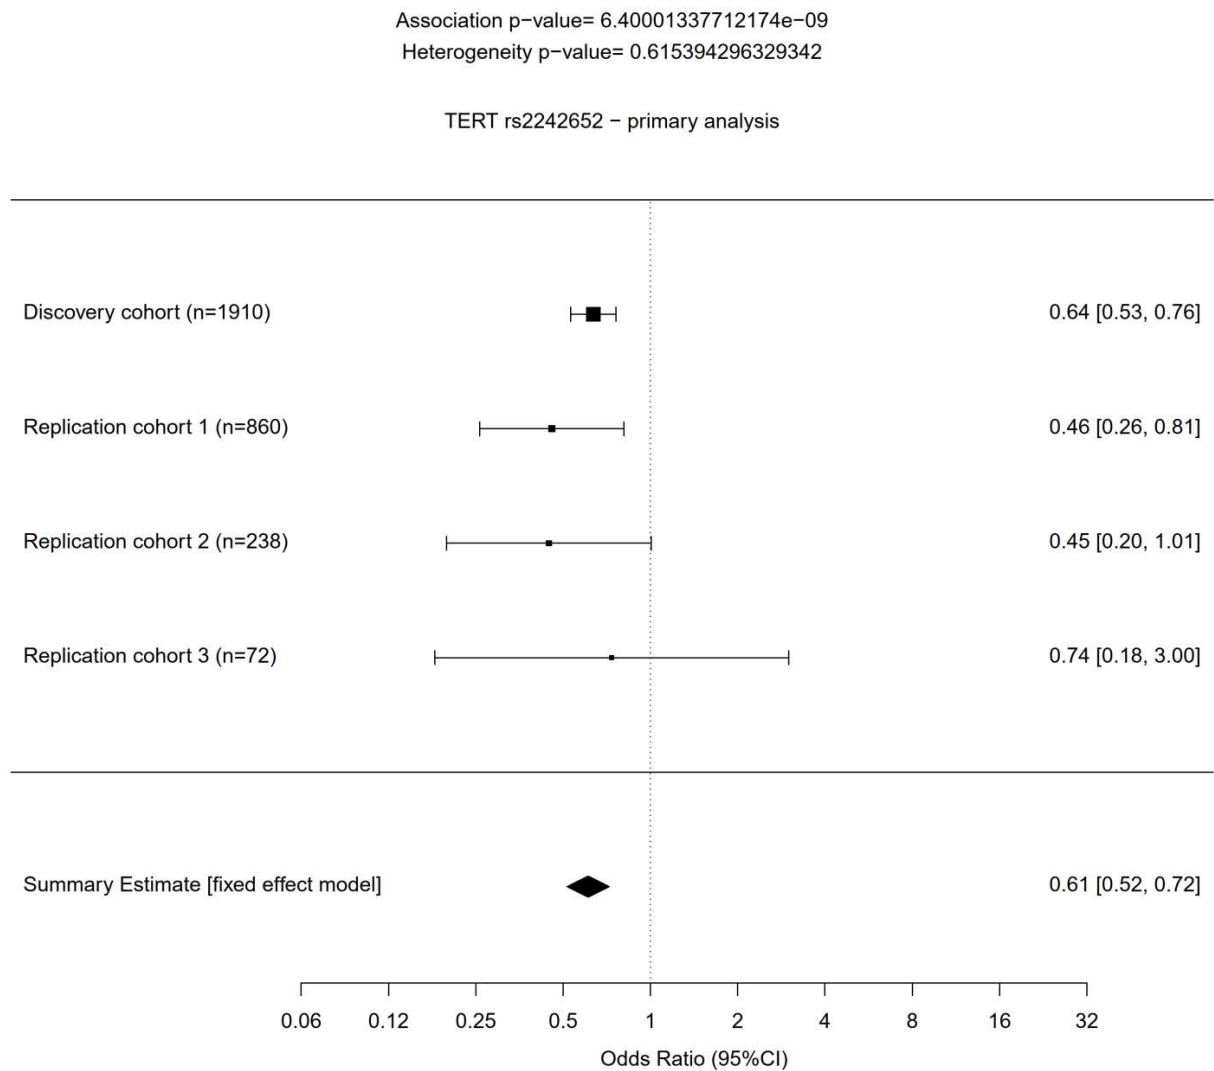

**Supplementary Figure 7: Regional plot *TERT* (Discovery and Replication cohorts combined)**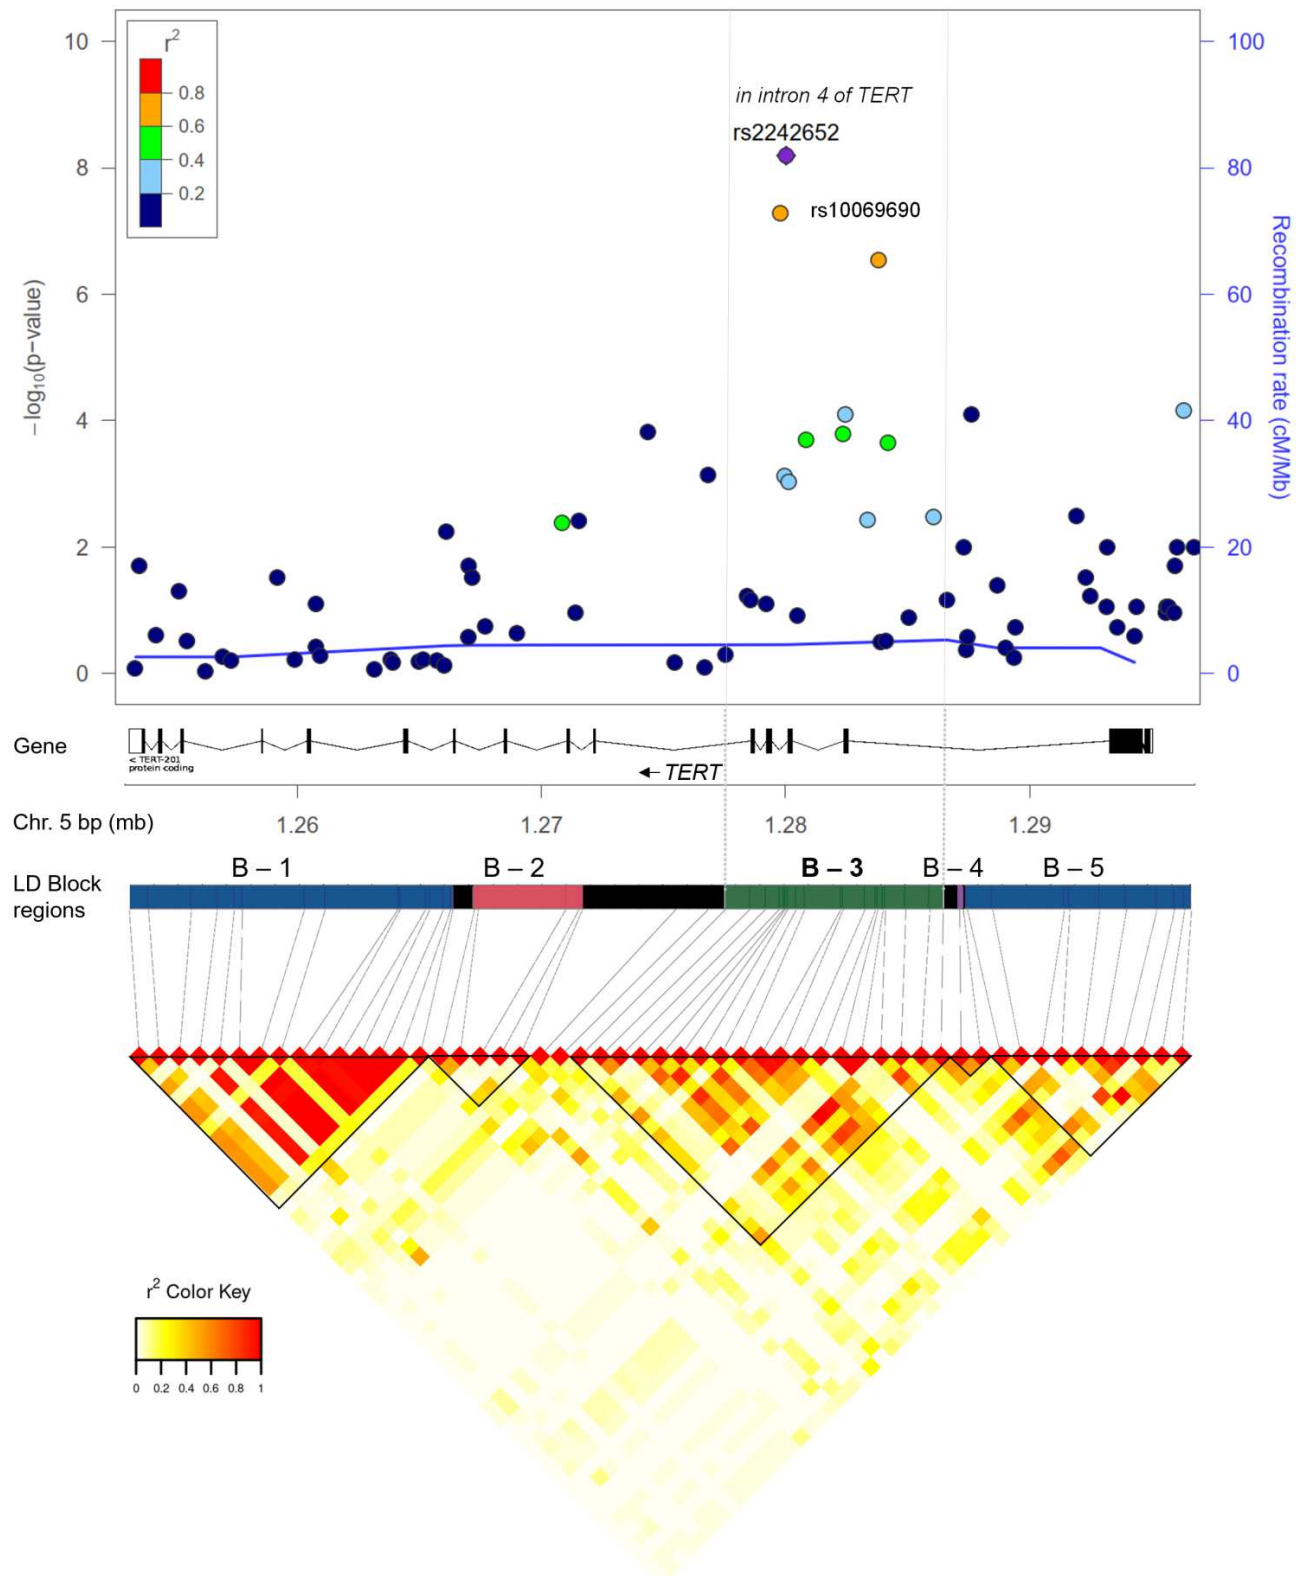



**Supplementary Figure 8: Regional plot *TM6SF2* (Discovery and Replication cohorts combined)**

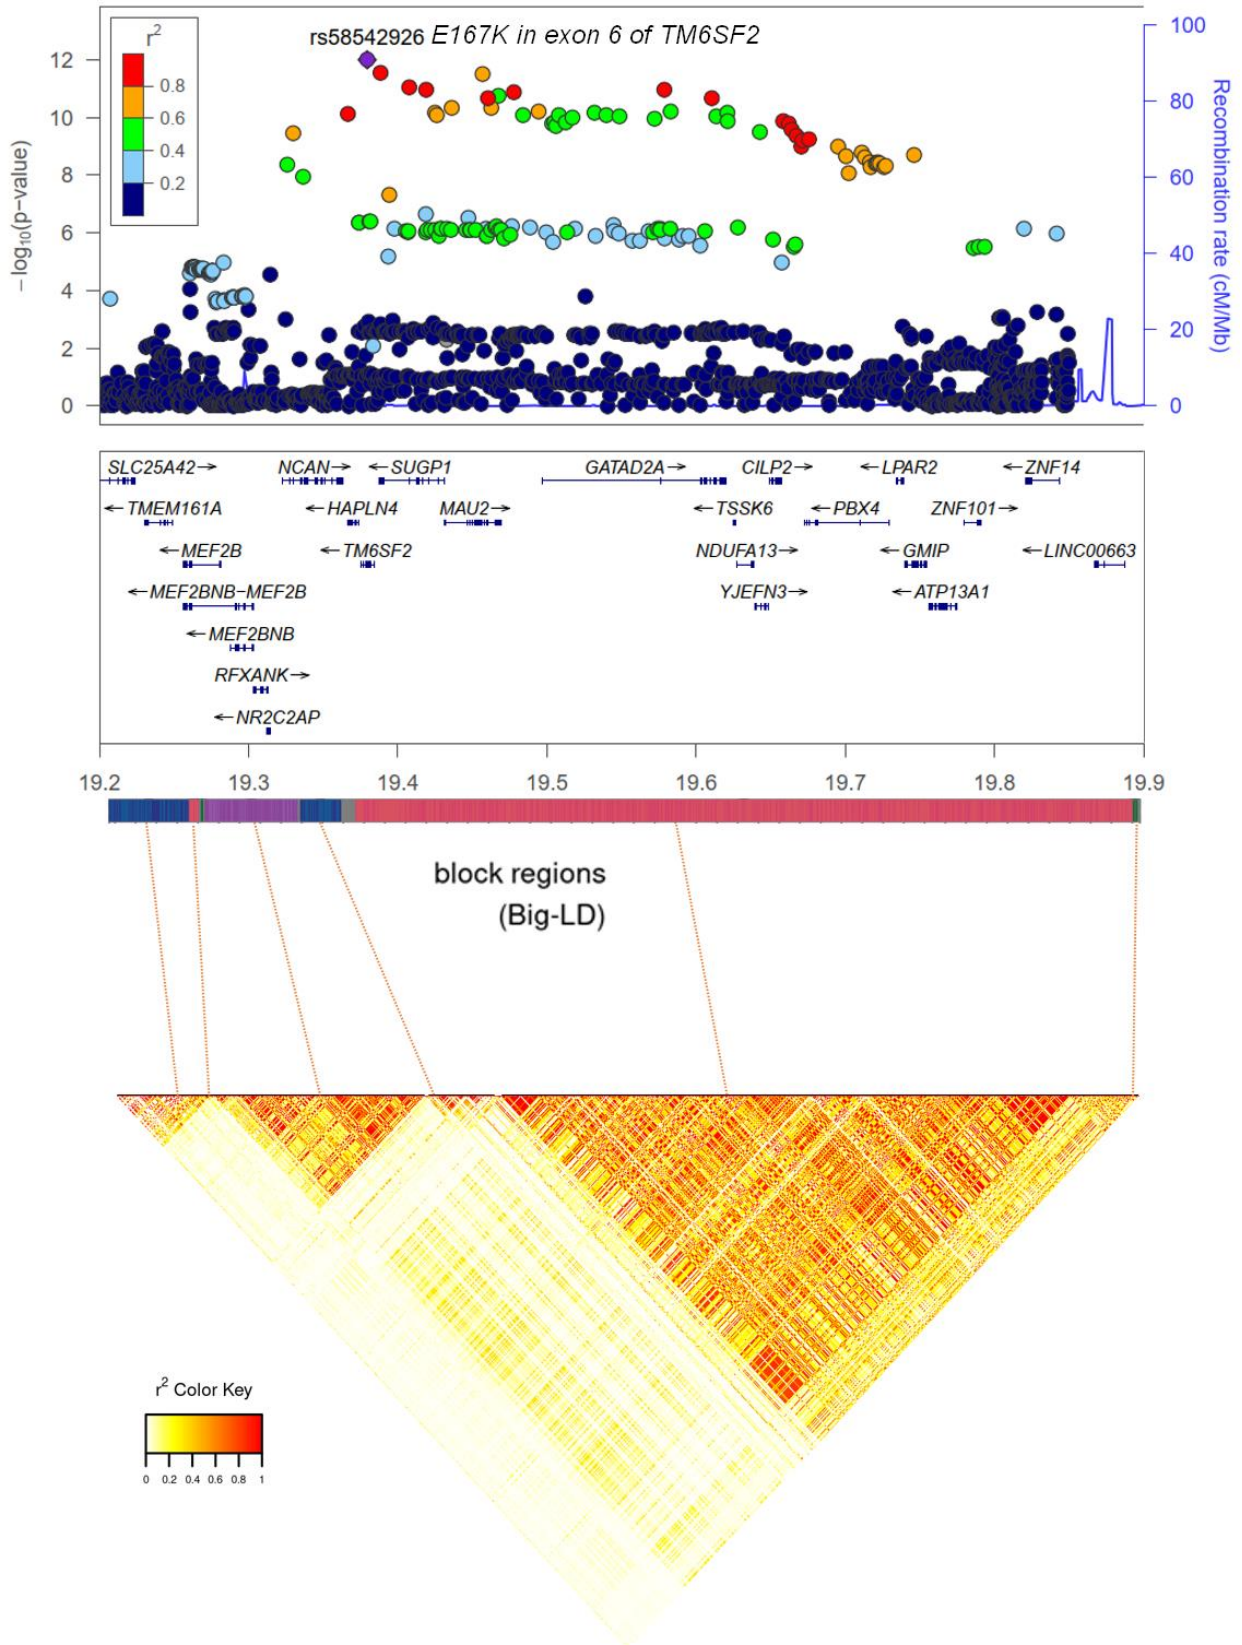

**Supplementary Figure 9: Regional plot *PNPLA3* (Discovery and Replication cohorts combined)**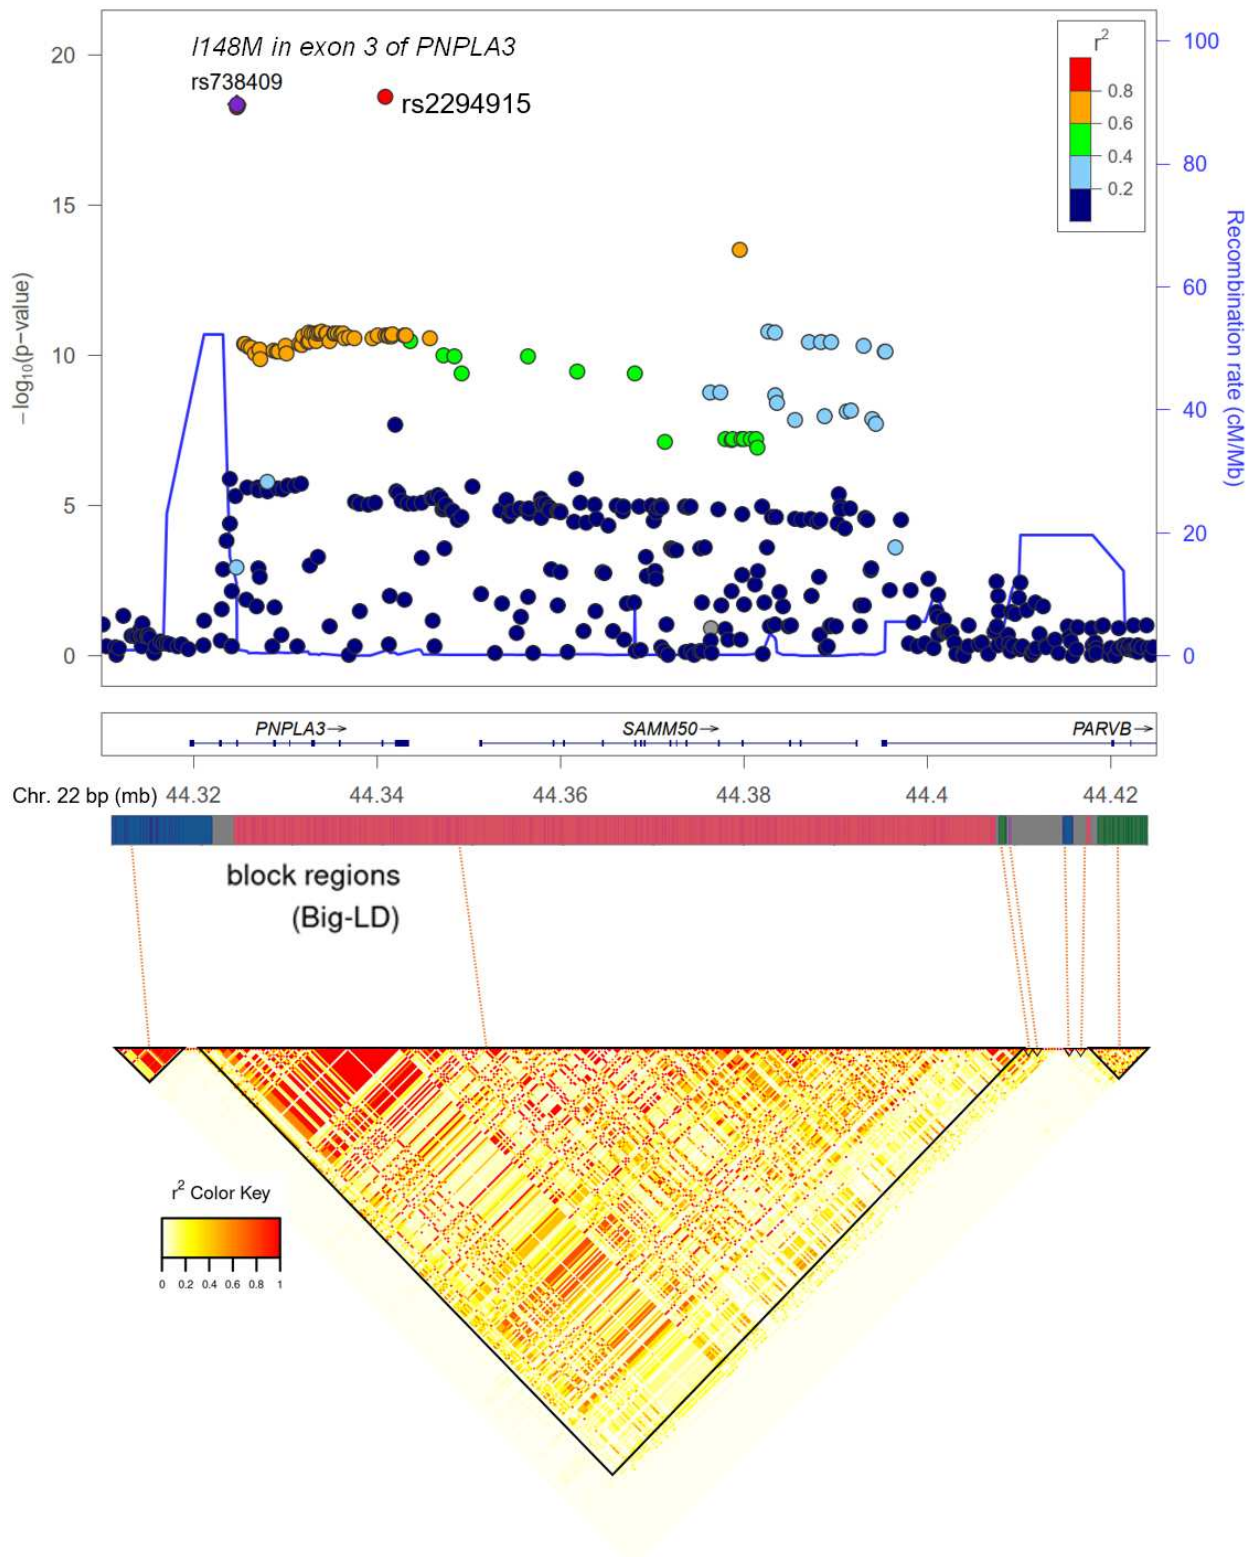

### Supplementary Figure 10: Forest plots for the associations of *TERT* variant rs2242652[ A allele] with the 10 most common cancer in UK Biobank and FinnGen biobank populated-based cohorts

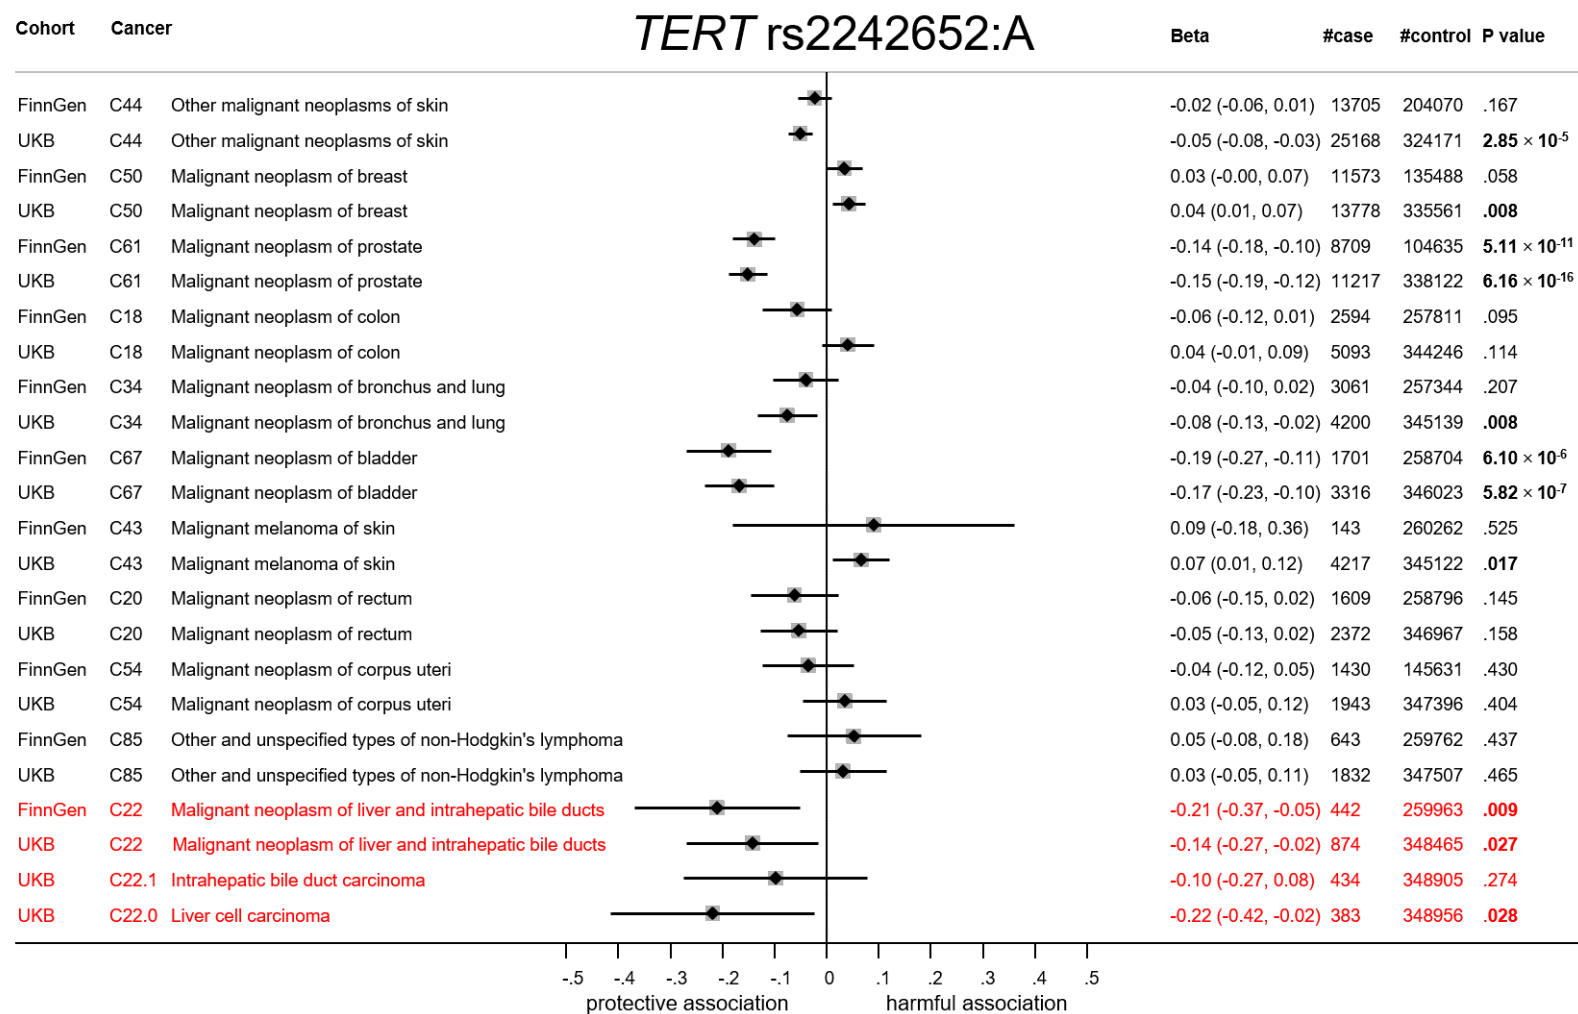

**Supplementary Figure 11: The relative proportion of patients with HCC grouped by the number of risk alleles in *PNPLA3*, *TM6SF2*, and *TERT***

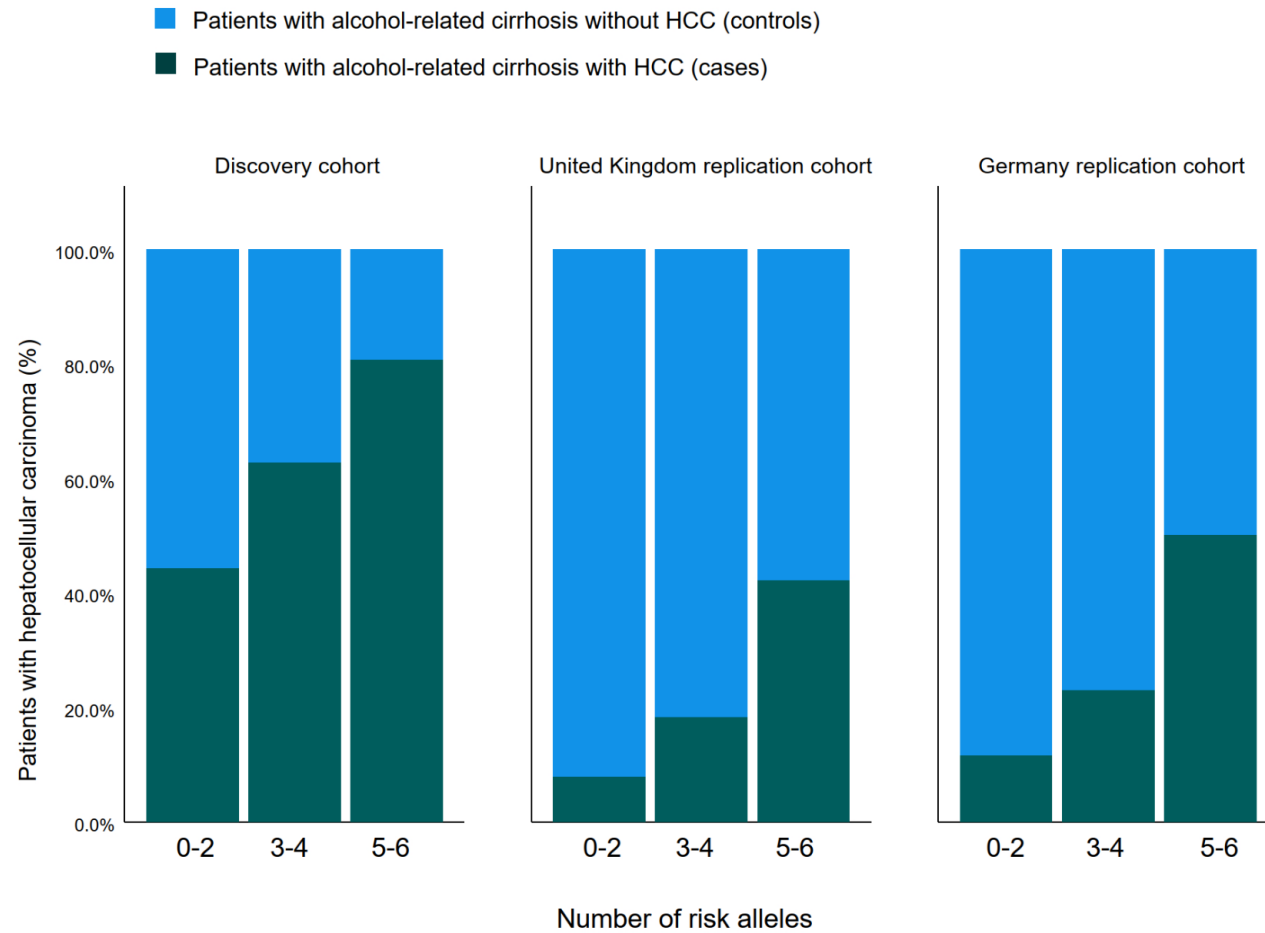

**Supplementary Figure 12: Association between the number of risk alleles in *PNPLA3*, *TM6SF2* and *TERT* and alcohol-related hepatocellular carcinoma.**

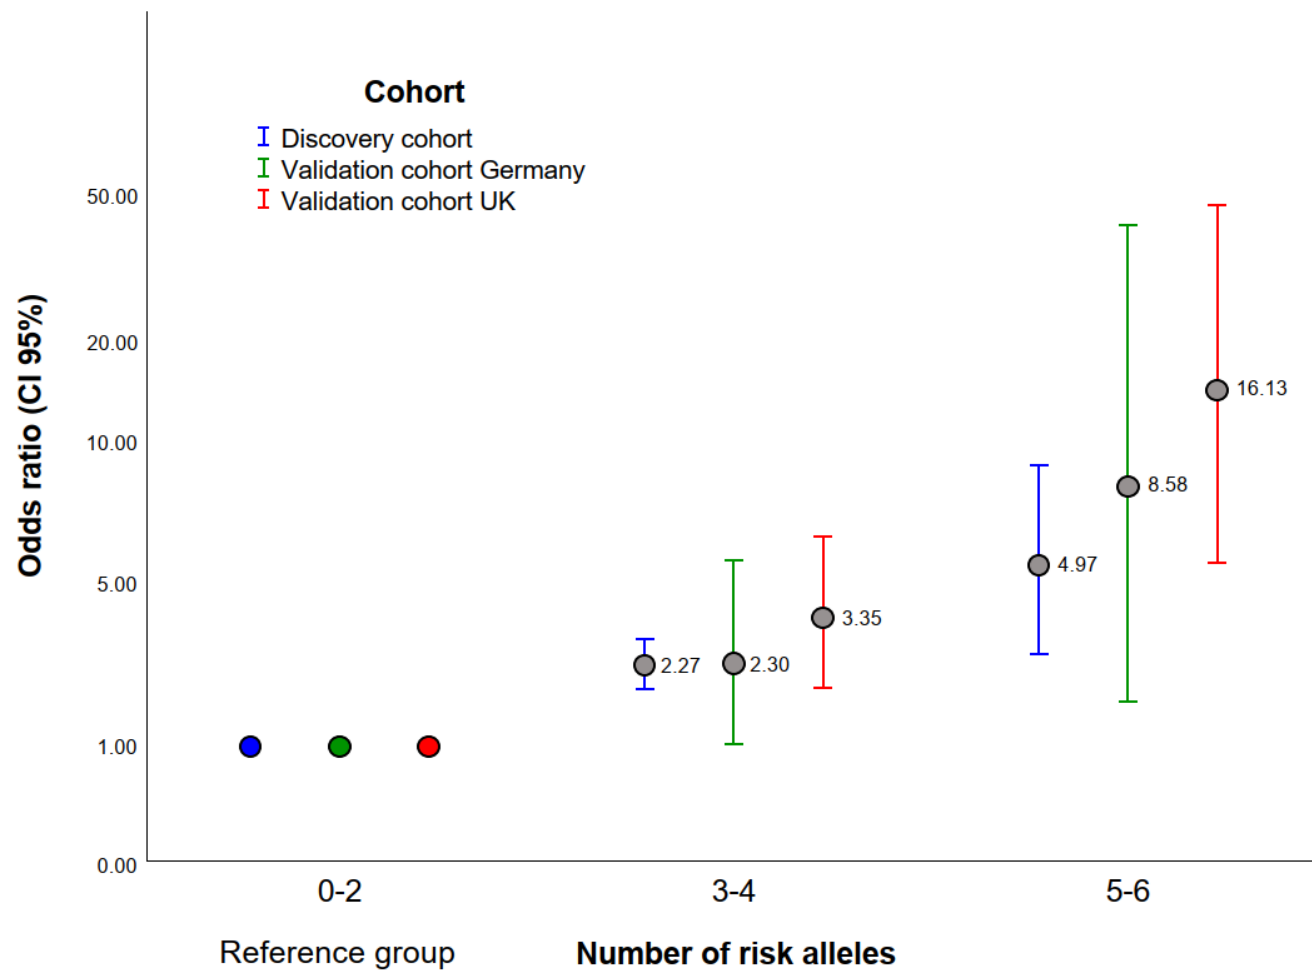

### Supplementay Figure 13: HCC association results overlaid with leukocyte telomere length association results and regulation for gene *TERT*

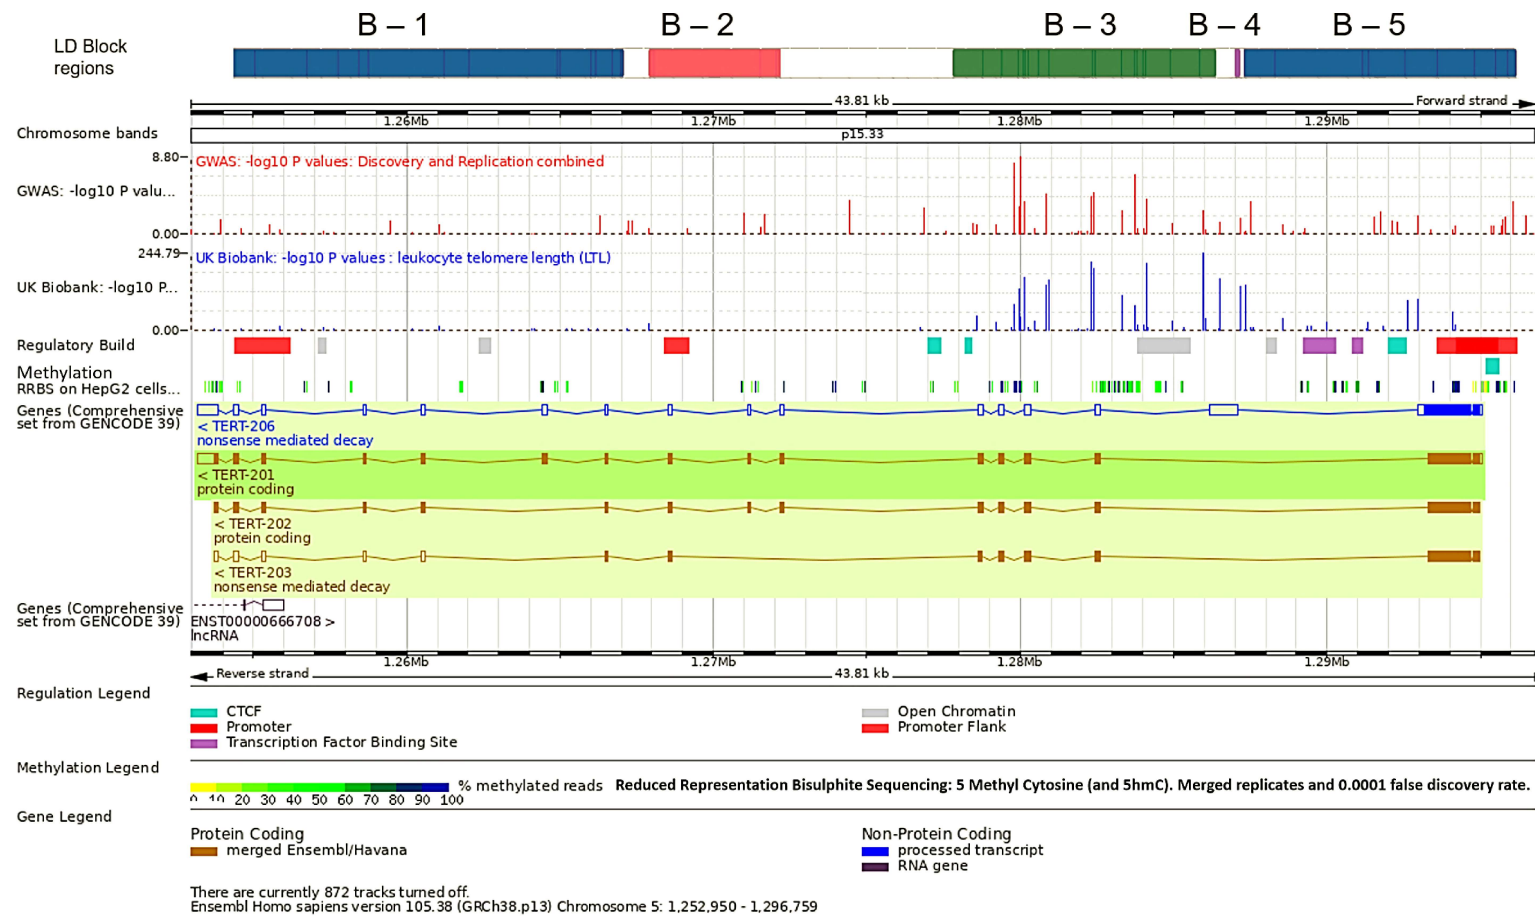

## SUPPLEMENTARY TABLES

**Supplementary Table 1: Power analysis for discovery GWAS (expected power to reject the null hypothesis)**

| Relative Risk (~OR)                                            | 1.4   | 1.5          | 1.6          | 1.7          | 1.8          | 1.9          | 2.0          | 2.1          | 2.2          | 2.3          |
|----------------------------------------------------------------|-------|--------------|--------------|--------------|--------------|--------------|--------------|--------------|--------------|--------------|
| <b>Power (p-value threshold <math>5 \times 10^{-6}</math>)</b> |       |              |              |              |              |              |              |              |              |              |
| Disease Allele Frequency*: 5%                                  | 0.019 | 0.066        | 0.167        | 0.329        | 0.525        | 0.709        | <b>0.847</b> | <b>0.931</b> | <b>0.973</b> | <b>0.991</b> |
| Disease Allele Frequency: 10%                                  | 0.122 | 0.342        | 0.626        | <b>0.846</b> | <b>0.995</b> | <b>0.991</b> | <b>1</b>     | <b>1</b>     | <b>1</b>     | <b>1</b>     |
| Disease Allele Frequency: 20%                                  | 0.453 | <b>0.803</b> | <b>0.962</b> | <b>0.996</b> | <b>1</b>     | <b>1</b>     | <b>1</b>     | <b>1</b>     | <b>1</b>     | <b>1</b>     |
| Disease Allele Frequency: 30%                                  | 0.667 | <b>0.933</b> | <b>0.994</b> | <b>1</b>     | <b>1</b>     | <b>1</b>     | <b>1</b>     | <b>1</b>     | <b>1</b>     | <b>1</b>     |
| Disease Allele Frequency: 40%                                  | 0.750 | <b>0.961</b> | <b>0.997</b> | <b>1</b>     | <b>1</b>     | <b>1</b>     | <b>1</b>     | <b>1</b>     | <b>1</b>     | <b>1</b>     |
| <b>Power (p-value threshold <math>5 \times 10^{-8}</math>)</b> |       |              |              |              |              |              |              |              |              |              |
| Disease Allele Frequency: 5%                                   | 0     | 0.008        | 0.032        | 0.092        | 0.205        | 0.369        | 0.555        | 0.725        | <b>0.852</b> | <b>0.931</b> |
| Disease Allele Frequency: 10%                                  | 0.020 | 0.098        | 0.554        | 0.554        | <b>0.791</b> | <b>0.928</b> | <b>1</b>     | <b>1</b>     | <b>1</b>     | <b>1</b>     |
| Disease Allele Frequency: 15%                                  | 0.069 | 0.252        | 0.537        | <b>0.790</b> | <b>0.930</b> | <b>0.983</b> | <b>0.997</b> | <b>1</b>     | <b>1</b>     | <b>1</b>     |
| Disease Allele Frequency: 20%                                  | 0.158 | 0.486        | <b>0.813</b> | <b>0.962</b> | <b>0.996</b> | <b>1</b>     | <b>1</b>     | <b>1</b>     | <b>1</b>     | <b>1</b>     |
| Disease Allele Frequency: 30%                                  | 0.325 | 0.729        | <b>0.947</b> | <b>0.995</b> | <b>1</b>     | <b>1</b>     | <b>1</b>     | <b>1</b>     | <b>1</b>     | <b>1</b>     |
| Disease Allele Frequency: 40%                                  | 0.416 | <b>0.810</b> | <b>0.971</b> | <b>0.998</b> | <b>1</b>     | <b>1</b>     | <b>1</b>     | <b>1</b>     | <b>1</b>     | <b>1</b>     |

Power of study design. Estimate of the power of the study, with 1066 cases and 844 controls using for SNPs above 5% MAF using the software Genetic Association Study (GAS) Power Calculator ([https://csg.sph.umich.edu/abecasis/gas\\_power\\_calculator/index.html](https://csg.sph.umich.edu/abecasis/gas_power_calculator/index.html)). \*Disease allele frequency of the risk associated allele in controls. If the true odds ratio for disease in exposed subjects relative to unexposed subjects is 1.4 to 2.3, we will be able to reject the null hypothesis that this odds ratio equals 1 with probability (power) see values in table, probabilities  $\geq 0.80$  are shown in bold print. The Type I error probability associated with this test of this null hypothesis is  $5 \times 10^{-6}$  for suggestive association or  $5 \times 10^{-8}$  for genome-wide evidence of association.

**Supplementary Table 2: Summary results for SNP rs738409 in *PNPLA3* for Discovery and Replication cohorts**

| Cohort                                                                                              | Disease status               | <i>PNPLA3</i> rs738409 C>G (p.I148M) |       |      |      |         |         |       | P-value *                 | Allelic OR (95%CI)<br>(Allele G) |
|-----------------------------------------------------------------------------------------------------|------------------------------|--------------------------------------|-------|------|------|---------|---------|-------|---------------------------|----------------------------------|
|                                                                                                     |                              | N                                    | CC    | CG   | GG   | Freq. C | Freq. G | HWE P |                           |                                  |
| <b>Discovery (Germany/Switzerland/Austria)</b>                                                      |                              |                                      |       |      |      |         |         |       |                           |                                  |
| Cases (HCC)                                                                                         | Cirrhosis (with HCC)         | 1066                                 | 302   | 503  | 261  | 0.519   | 0.481   | 0.073 | -                         | -                                |
| Controls (ArC)                                                                                      | Cirrhosis (without HCC)      | 844                                  | 361   | 371  | 112  | 0.648   | 0.352   | 0.282 | 1.62 × 10 <sup>-15</sup>  | 1.70 (1.49-1.94)                 |
| <b>Replication (United Kingdom)</b>                                                                 |                              |                                      |       |      |      |         |         |       |                           |                                  |
| Cases (HCC)                                                                                         | Cirrhosis (with HCC)         | 70                                   | 18    | 36   | 16   | 0.514   | 0.486   | 0.805 | -                         | -                                |
| Controls (ArC)                                                                                      | Cirrhosis (without HCC)      | 790                                  | 393   | 319  | 78   | 0.699   | 0.301   | 0.264 | 6.31 × 10 <sup>-6</sup>   | 2.20 (1.55-3.11)                 |
| Controls (AM) #1                                                                                    | Alcohol misusers +           | 340                                  | 223   | 108  | 9    | 0.815   | 0.185   | 0.337 | 2.60 × 10 <sup>-14</sup>  | 4.15 (2.83-6.10)                 |
| Analysis of cirrhosis risk**: Cirrhosis (without HCC) vs. Alcohol misusers +                        |                              |                                      |       |      |      |         |         |       | 1.26 × 10 <sup>-8</sup>   | 1.89 (1.51-2.36)                 |
| <b>Replication (Germany)</b>                                                                        |                              |                                      |       |      |      |         |         |       |                           |                                  |
| Cases (HCC)                                                                                         | Cirrhosis (with HCC)         | 42                                   | 12    | 18   | 12   | 0.500   | 0.500   | 0.355 | -                         | -                                |
| Controls (ArC)                                                                                      | Cirrhosis (without HCC)      | 196                                  | 73    | 93   | 30   | 0.610   | 0.390   | 0.966 | 0.064                     | 1.56 (0.97-2.51)                 |
| <b>Replication (Italy)</b>                                                                          |                              |                                      |       |      |      |         |         |       |                           |                                  |
| Cases (HCC)                                                                                         | Cirrhosis (with HCC)         | 36                                   | 7     | 19   | 10   | 0.458   | 0.542   | 0.706 | -                         | -                                |
| Controls (ArC)                                                                                      | Cirrhosis (without HCC)      | 36                                   | 13    | 16   | 7    | 0.583   | 0.417   | 0.607 | 0.133                     | 1.65 (0.86-3.20)                 |
| <b>Risk validation in joined discovery (Germany/Switzerland) &amp; replication (Germany) cohort</b> |                              |                                      |       |      |      |         |         |       |                           |                                  |
| Cases (HCC)                                                                                         | Cirrhosis (with HCC)         | 1108                                 | 314   | 521  | 273  | 0.519   | 0.481   | 0.052 | -                         | -                                |
| Controls (ArC)                                                                                      | Cirrhosis (without HCC)      | 1040                                 | 434   | 464  | 142  | 0.640   | 0.360   | 0.312 | 6.35 × 10 <sup>-16</sup>  | 1.65 (1.46-1.87)                 |
| Controls (AM) #2                                                                                    | Alcohol misusers +           | 1105                                 | 664   | 387  | 54   | 0.776   | 0.224   | 0.804 | 4.56 × 10 <sup>-64</sup>  | 3.22 (2.82-3.66)                 |
| Population controls #3                                                                              | European population controls | 25362                                | 15344 | 8784 | 1234 | 0.778   | 0.222   | 0.610 | 2.15 × 10 <sup>-176</sup> | 3.26 (2.99-3.55)                 |
| Analysis of cirrhosis risk**: Cirrhosis (without HCC) vs. Alcohol misusers +                        |                              |                                      |       |      |      |         |         |       | 6.59 × 10 <sup>-23</sup>  | 1.99 (1.74-2.29)                 |

\* Significance was calculated as one degree of freedom Chi-squared test of allelic counts; + heavy drinkers with no cirrhosis and no HCC; Association results for alcohol-related HCC (cases) in comparison to alcohol-related cirrhosis (controls); and in comparison, to alcohol misusers with cirrhosis (non-cirrhosis controls) and to population controls. Genotype counts reflect the rounded sum of imputed genotype probabilities for individuals in the sample. Allelic odds ratios were calculated from 2 × 2 tables on rounded genotype counts. \*\*Analysis of cirrhosis risk performed in individual cohorts by comparing ArC vs. alcohol misuser without cirrhosis. HWE P: Hardy Weinberg Equilibrium P value; #1 Alcohol misusers (ALC) with a clinical diagnosis of alcohol dependence recruited from Centre for Hepatology at the Royal Free Hospital, London without clinical or laboratory evidence of liver cirrhosis or HCC (data from Buch et al. Nat Genet. 2015 Dec;47(12):1443-8). #2 Alcohol misusers with a clinical diagnosis of alcohol dependence from Germany/Switzerland without clinical or laboratory evidence of liver disease or HCC (data from Buch et al. Nat Genet. 2015 Dec;47(12):1443-8); #3 North-western European population controls from gnomAD (v2.1.1).



**Supplementary Table 3: Summary results for SNP rs58542926 in *TM6SF2* for Discovery and Replication cohorts**

| Cohort                                                                                              | Disease status               | <i>TM6SF2</i> rs58542926 C>T (p.E167K) |       |      |     |         |         |       | P-value *                | Allelic OR (95%CI)<br>(Allele T) |
|-----------------------------------------------------------------------------------------------------|------------------------------|----------------------------------------|-------|------|-----|---------|---------|-------|--------------------------|----------------------------------|
|                                                                                                     |                              | N                                      | CC    | CT   | TT  | Freq. C | Freq. T | HWE P |                          |                                  |
| <b>Discovery (Germany/Switzerland/Austria)</b>                                                      |                              |                                        |       |      |     |         |         |       |                          |                                  |
| Cases (HCC)                                                                                         | Cirrhosis (with HCC)         | 1066                                   | 781   | 253  | 32  | 0.851   | 0.149   | 0.041 | -                        | -                                |
| Controls (ArC)                                                                                      | Cirrhosis (without HCC)      | 844                                    | 710   | 125  | 9   | 0.915   | 0.085   | 0.191 | 1.61 × 10 <sup>-9</sup>  | 1.89 (1.53-2.33)                 |
| <b>Replication (United Kingdom)</b>                                                                 |                              |                                        |       |      |     |         |         |       |                          |                                  |
| Cases (HCC)                                                                                         | Cirrhosis (with HCC)         | 70                                     | 45    | 20   | 5   | 0.786   | 0.214   | 0.205 | -                        | -                                |
| Controls (ArC)                                                                                      | Cirrhosis (without HCC)      | 790                                    | 648   | 135  | 7   | 0.906   | 0.094   | 0.991 | 8.35 × 10 <sup>-6</sup>  | 2.55 (1.65-3.95)                 |
| Controls (AM) #1                                                                                    | Alcohol misusers +           | 340                                    | 296   | 43   | 1   | 0.934   | 0.066   | 0.668 | 3.09 × 10 <sup>-8</sup>  | 3.85 (2.32-6.37)                 |
| Analysis of cirrhosis risk**: Cirrhosis (without HCC) vs. Alcohol misusers +                        |                              |                                        |       |      |     |         |         |       | 0.0286                   | 1.47 (1.04-2.08)                 |
| <b>Replication (Germany)</b>                                                                        |                              |                                        |       |      |     |         |         |       |                          |                                  |
| Cases (HCC)                                                                                         | Cirrhosis (with HCC)         | 42                                     | 33    | 7    | 2   | 0.869   | 0.131   | 0.083 | -                        | -                                |
| Controls (ArC)                                                                                      | Cirrhosis (without HCC)      | 196                                    | 159   | 32   | 5   | 0.893   | 0.107   | 0.040 | 0.529                    | 1.26 (0.62-2.55)                 |
| <b>Replication (Italy)</b>                                                                          |                              |                                        |       |      |     |         |         |       |                          |                                  |
| Cases (HCC)                                                                                         | Cases (HCC)                  | 36                                     | 31    | 5    | 0   | 0.931   | 0.069   | 0.654 |                          |                                  |
| Controls (ArC)                                                                                      | Controls (ArC)               | 36                                     | 28    | 8    | 0   | 0.889   | 0.111   | 0.453 | 0.383                    | 0.60 (0.19-1.92)                 |
| <b>Risk validation in joined discovery (Germany/Switzerland) &amp; replication (Germany) cohort</b> |                              |                                        |       |      |     |         |         |       |                          |                                  |
| Cases (HCC)                                                                                         | Cirrhosis (with HCC)         | 1108                                   | 814   | 260  | 34  | 0.852   | 0.148   | 0.021 |                          |                                  |
| Controls (ArC)                                                                                      | Cirrhosis (without HCC)      | 1040                                   | 869   | 157  | 14  | 0.911   | 0.089   | 0.027 | 2.42 × 10 <sup>-9</sup>  | 1.78 (1.47-2.15)                 |
| Controls (AM) #2                                                                                    | Alcohol misusers +           | 1115                                   | 987   | 124  | 4   | 0.941   | 0.059   | 0.960 | 2.41 × 10 <sup>-22</sup> | 2.76 (2.24-3.41)                 |
| Population controls #3                                                                              | European population controls | 23816                                  | 20633 | 3082 | 101 | 0.931   | 0.069   | 0.218 | 9.57 × 10 <sup>-45</sup> | 2.35 (2.08-2.65)                 |
| Analysis of cirrhosis risk**: Cirrhosis (without HCC) vs. Alcohol misusers +                        |                              |                                        |       |      |     |         |         |       | 1.44 × 10 <sup>-4</sup>  | 1.58 (1.25-2.01)                 |

\* Significance was calculated as one degree of freedom Chi-squared test of allelic counts. + heavy drinkers with no cirrhosis and no HCC; Association results for alcohol-related HCC (cases) in comparison to alcohol-related cirrhosis (controls); and in comparison, to alcohol misusers with cirrhosis (non-cirrhosis controls) and to population controls. Genotype counts reflect the rounded sum of imputed genotype probabilities for individuals in the sample. Allelic odds ratios were calculated from 2 × 2 tables on rounded genotype counts. \*\*Analysis of cirrhosis risk performed in individual cohorts by comparing ArC vs. alcohol misuser without cirrhosis. HWE P: Hardy Weinberg Equilibrium P value; #1 Alcohol misusers (ALC) with a clinical diagnosis of alcohol dependence recruited from Centre for Hepatology at the Royal Free Hospital, London without clinical or laboratory evidence of liver cirrhosis or HCC (data from Buch et al. Nat Genet. 2015 Dec;47(12):1443-8). #2 Alcohol misusers with a clinical diagnosis of alcohol dependence from Germany/Switzerland without clinical or laboratory evidence of liver disease or HCC (data from Buch et al. Nat Genet. 2015 Dec;47(12):1443-8); #3 North-western European population controls from gnomAD (v2.1.1).

**Supplementary Table 4: Summary results for SNP rs2242652 in *TERT* for Discovery and Replication cohorts**

| Cohort                                                                                              | Disease status               | <i>TERT</i> rs2242652 G>A |           |           |           |                |                |                     | <i>P</i> -value *       | Allelic OR (95%CI)     |
|-----------------------------------------------------------------------------------------------------|------------------------------|---------------------------|-----------|-----------|-----------|----------------|----------------|---------------------|-------------------------|------------------------|
| <b>Discovery (Germany/Switzerland/Austria)</b>                                                      |                              | <b>N</b>                  | <b>GG</b> | <b>GA</b> | <b>AA</b> | <b>Freq. G</b> | <b>Freq. A</b> | <b>HWE <i>P</i></b> | Chi-Square test         | 2 × 2 table (A allele) |
| Cases (HCC)                                                                                         | Cirrhosis (with HCC)         | 1066                      | 803       | 243       | 20        | 0.867          | 0.133          | 0.746               | -                       | -                      |
| Controls (ArC)                                                                                      | Cirrhosis (without HCC)      | 844                       | 555       | 256       | 33        | 0.809          | 0.191          | 0.610               | 1.07×10 <sup>-6</sup>   | 0.65 (0.55-0.77)       |
| <b>Replication (United Kingdom)</b>                                                                 |                              |                           |           |           |           |                |                |                     |                         |                        |
| Cases (HCC)                                                                                         | Cirrhosis (with HCC)         | 70                        | 57        | 11        | 2         | 0.893          | 0.107          | 0.135               | -                       | -                      |
| Controls (ArC)                                                                                      | Cirrhosis (without HCC)      | 783                       | 500       | 253       | 30        | 0.800          | 0.200          | 0.775               | 7.64×10 <sup>-3</sup>   | 0.48 (0.28-0.83)       |
| Controls (AM) #1                                                                                    | Alcohol misusers +           | 341                       | 221       | 112       | 8         | 0.812          | 0.188          | 0.154               | 2.20×10 <sup>-2</sup>   | 0.52 (0.29-0.92)       |
| Analysis of cirrhosis risk**: Cirrhosis (without HCC) vs. Alcohol misusers +                        |                              |                           |           |           |           |                |                |                     | 0.503                   | 1.08 (0.86-1.36)       |
| <b>Replication (Germany)</b>                                                                        |                              |                           |           |           |           |                |                |                     |                         |                        |
| Cases (HCC)                                                                                         | Cirrhosis (with HCC)         | 42                        | 32        | 10        | 0         | 0.881          | 0.119          | 0.381               | -                       | -                      |
| Controls (ArC)                                                                                      | Cirrhosis (without HCC)      | 196                       | 119       | 71        | 6         | 0.788          | 0.212          | 0.233               | 0.052                   | 0.50 (0.25-1.02)       |
| <b>Replication (Italy)</b>                                                                          |                              |                           |           |           |           |                |                |                     |                         |                        |
| Cases (HCC)                                                                                         | Cirrhosis (with HCC)         | 36                        | 27        | 9         | 0         | 0.875          | 0.125          | 0.391               | -                       | -                      |
| Controls (ArC)                                                                                      | Cirrhosis (without HCC)      | 36                        | 27        | 8         | 1         | 0.861          | 0.139          | 0.670               | 0.806                   | 0.89 (0.34-2.33)       |
| <b>Risk validation in joined discovery (Germany/Switzerland) &amp; replication (Germany) cohort</b> |                              |                           |           |           |           |                |                |                     |                         |                        |
| Cases (HCC)                                                                                         | Cirrhosis (with HCC)         | 1108                      | 835       | 253       | 20        | 0.868          | 0.132          | 0.869               |                         |                        |
| Controls (ArC)                                                                                      | Cirrhosis (without HCC)      | 1040                      | 674       | 327       | 39        | 0.805          | 0.195          | 0.932               | 2.87 ×10 <sup>-8</sup>  | 0.63 (0.53-0.74)       |
| Controls (AM) #2                                                                                    | Alcohol misusers +           | 1179                      | 760       | 367       | 52        | 0.800          | 0.200          | 0.366               | 9.43 ×10 <sup>-10</sup> | 0.61 (0.52-0.72)       |
| Population controls #3                                                                              | European population controls | 4290                      | 2797      | 1344      | 149       | 0.809          | 0.191          | 0.423               | 9.64 ×10 <sup>-11</sup> | 0.64 (0.56-0.74)       |
| Analysis of cirrhosis risk**: Cirrhosis (without HCC) vs. Alcohol misusers +                        |                              |                           |           |           |           |                |                |                     | 0.511                   | 0.95 (0.82-1.11)       |

\* Significance was calculated as one degree of freedom Chi-squared test of allelic counts. + heavy drinkers with no cirrhosis and no HCC; Association results for alcohol-related HCC (cases) in comparison to ArC (controls); and in comparison, to alcohol misusers with cirrhosis (non-cirrhosis controls) and to population controls. Genotype counts reflect the rounded sum of imputed genotype probabilities for individuals in the sample. Allelic odds ratios were calculated from 2 × 2 tables on rounded genotype counts. \*\*Analysis of cirrhosis risk performed in individual cohorts by comparing ArC vs. alcohol misuser without cirrhosis. HWE *P*: Hardy Weinberg Equilibrium *P* value; #1 Alcohol misusers (ALC) with a clinical diagnosis of alcohol dependence recruited from Centre for Hepatology at the Royal Free Hospital, London without clinical or laboratory evidence of liver cirrhosis or HCC (data from Buch et al. Nat Genet. 2015 Dec;47(12):1443-8). #2 Alcohol misusers with a clinical diagnosis of alcohol dependence from Germany/Switzerland without clinical or laboratory evidence of liver disease or HCC (data from Buch et al. Nat Genet. 2015); #3 North-western European population controls from gnomAD (v2.1.1).

**Supplementary Table 5: Replicated and known HCC risk loci successively adjusted for sex, age, BMI and type 2 diabetes status**

|                        |                             | Discovery cohort                  |                                   |                                   |                                   | Combined (Discovery and Replication cohorts)     |                                                |                                                |                                                |
|------------------------|-----------------------------|-----------------------------------|-----------------------------------|-----------------------------------|-----------------------------------|--------------------------------------------------|------------------------------------------------|------------------------------------------------|------------------------------------------------|
| Covariate adjustments  |                             | PCs                               | PCs, sex, age                     | PCs, sex, age, BMI                | PCs, sex, age, BMI, Diabetes      | PCs                                              | PCs, sex, age                                  | PCs, sex, age, BMI                             | PCs, sex, age, BMI, Diabetes                   |
| N (cases)              |                             | 1066                              | 1066                              | 740                               | 616                               | 1214                                             | 1214                                           | 857                                            | 731                                            |
| N (controls)           |                             | 844                               | 844                               | 765                               | 423                               | 1866                                             | 1866                                           | 1684                                           | 1337                                           |
| Effective sample size* |                             | 1884                              | 1884                              | 1505                              | 1003                              | 2352                                             | 2352                                           | 1889                                           | 1382                                           |
| Locus                  | Chr. SNP ID (effect allele) | Adjusted OR <sup>a</sup> (Pvalue) | Adjusted OR <sup>b</sup> (Pvalue) | Adjusted OR <sup>c</sup> (Pvalue) | Adjusted OR <sup>d</sup> (Pvalue) | Adjusted OR <sup>a</sup> (Pvalue) <sup>a,e</sup> | Adjusted OR <sup>b</sup> (Pvalue) <sup>e</sup> | Adjusted OR <sup>c</sup> (Pvalue) <sup>e</sup> | Adjusted OR <sup>d</sup> (Pvalue) <sup>e</sup> |
| <b>PNPLA3</b>          | 22 rs738409                 | 1.71 (1.49-1.96)                  | 1.75 (1.51-2.03)                  | 1.87 (1.58-2.22)                  | 2.07 (1.69-2.54)                  | 1.74 (1.54-1.97)                                 | 1.77 (1.55-2.02)                               | 1.86 (1.60-2.16)                               | 1.99 (1.68-2.37)                               |
| p.I148M                | (G)                         | $7.23 \times 10^{-15}$            | $1.67 \times 10^{-13}$            | $3.22 \times 10^{-13}$            | $3.21 \times 10^{-12}$            | $4.31 \times 10^{-19}$                           | $5.35 \times 10^{-17}$                         | $4.93 \times 10^{-16}$                         | $5.62 \times 10^{-15}$                         |
| <b>TM6SF2</b>          | 19 rs58542926               | 1.94 (1.56-2.42)                  | 1.93 (1.51-2.45)                  | 2.03 (1.55-2.65)                  | 1.98 (1.43-2.74)                  | 1.98 (1.64-2.40)                                 | 1.99 (1.61-2.44)                               | 2.08 (1.66-2.61)                               | 2.07 (1.60-2.68)                               |
| p.E167K                | (T)                         | $2.81 \times 10^{-9}$             | $1.21 \times 10^{-7}$             | $2.01 \times 10^{-7}$             | $3.43 \times 10^{-5}$             | $1.00 \times 10^{-12}$                           | $8.80 \times 10^{-11}$                         | $2.24 \times 10^{-10}$                         | $3.63 \times 10^{-8}$                          |
| <b>TERT</b>            | 5 rs2242652                 | 0.64 (0.53-0.76)                  | 0.64 (0.52-0.78)                  | 0.68 (0.55-0.85)                  | 0.69 (0.54-0.90)                  | 0.61 (0.52-0.72)                                 | 0.60 (0.50-0.72)                               | 0.64 (0.52-0.78)                               | 0.63 (0.50-0.79)                               |
|                        | (A)                         | $7.87 \times 10^{-7}$             | $9.28 \times 10^{-6}$             | $5.19 \times 10^{-4}$             | $5.89 \times 10^{-3}$             | $6.40 \times 10^{-9}$                            | $4.08 \times 10^{-8}$                          | $9.11 \times 10^{-6}$                          | $7.94 \times 10^{-5}$                          |
| <b>WNT3A-WNT9A</b>     | 1 rs708113                  | 0.97 (0.85-1.11)                  | 0.97 (0.83-1.13)                  | 0.93 (0.79-1.10)                  | 0.94 (0.77-1.16)                  | 0.99 (0.87-1.14)                                 | 0.98 (0.86-1.13)                               | 0.92 (0.79-1.07)                               | 0.91 (0.77-1.09)                               |
|                        | (T)                         | 0.666                             | 0.680                             | 0.402                             | 0.579                             | 0.932                                            | 0.800                                          | 0.279                                          | 0.321                                          |
| <b>APOE</b>            | 19 rs429358                 | 0.74 (0.60-0.91)                  | 0.76 (0.60-0.96)                  | 0.74 (0.57-0.96)                  | 0.68 (0.50-0.93)                  | 0.71 (0.58-0.86)                                 | 0.72 (0.58-0.89)                               | 0.68 (0.54-0.87)                               | 0.63 (0.47-0.83)                               |
|                        | (C)                         | $5.44 \times 10^{-3}$             | $2.35 \times 10^{-2}$             | $2.50 \times 10^{-2}$             | $1.59 \times 10^{-2}$             | $5.76 \times 10^{-4}$                            | $2.72 \times 10^{-3}$                          | $2.17 \times 10^{-3}$                          | $1.07 \times 10^{-3}$                          |
| <b>HSD17B13</b>        | 4 rs72613567                | 0.81 (0.69-0.95)                  | 0.84 (0.71-1.01)                  | 0.85 (0.69-1.03)                  | 0.79 (0.63-1.01)                  | 0.85 (0.73-0.99)                                 | 0.82 (0.71-0.95)                               | 0.83 (0.69-0.99)                               | 0.79 (0.64-0.96)                               |
|                        | (TA)                        | $8.95 \times 10^{-3}$             | $5.91 \times 10^{-2}$             | 0.102                             | $5.91 \times 10^{-2}$             | $3.63 \times 10^{-2}$                            | $7.22 \times 10^{-3}$                          | $3.73 \times 10^{-2}$                          | $1.96 \times 10^{-2}$                          |

Multivariate logistic regression analyses of susceptibility loci for alcohol-related HCC in comparison to ArC, under the additive genetic model; PCs: principal components of genetic ancestry; all analyses were adjusted by top 15 PCs; Chr., chromosome; OR, odds ratio. Odds ratios are provided with 95% confidence interval; Phenotypic information for BMI and type 2 diabetes status was available for cases and controls accordingly to Table 1.

<sup>a</sup> adjusted for top 15 principal components of genetic ancestry

<sup>b</sup> adjusted for age, sex, and top 15 principal components of genetic ancestry

<sup>c</sup> adjusted for age, sex, BMI, and top 15 principal components of genetic ancestry

<sup>d</sup> adjusted for age, sex, BMI, type II diabetes mellitus and top 15 principal components of genetic ancestry

<sup>e</sup> derived from fixed effect model summary estimates of discovery and replication cohorts

\* Effective sample size =  $4 / (1/\text{number of cases} + 1/\text{number of controls})$ ; in the combined analysis the sum of the effective sample sizes of each cohort is reported

**Supplementary Table 6: Meta-analysis GWAS association results for loci with  $P < 1 \times 10^{-7}$** 

| Locus* | CHR | Position | SNP         | EA | Meta-analysis of stage 1 and 2 cohorts (pc adjusted) |      |        |           |
|--------|-----|----------|-------------|----|------------------------------------------------------|------|--------|-----------|
|        |     |          |             |    | P-value <sup>a</sup>                                 | OR   | HetISq | Direction |
| TERT   | 5   | 1280028  | rs2242652   | A  | 6.40E-09                                             | 0.61 | 0      | ----      |
| TERT   | 5   | 1279790  | rs10069690  | T  | 5.19E-08                                             | 0.66 | 0      | ----      |
| TM6SF2 | 19  | 19379549 | rs58542926  | T  | 1.00E-12                                             | 1.98 | 43.25  | +++       |
| TM6SF2 | 19  | 19388500 | rs8107974   | A  | 2.93E-12                                             | 1.94 | 44.39  | +++       |
| TM6SF2 | 19  | 19456917 | rs58489806  | T  | 3.04E-12                                             | 1.88 | 32.17  | +++       |
| TM6SF2 | 19  | 19407718 | rs10401969  | T  | 8.98E-12                                             | 1.89 | 40.74  | +++       |
| TM6SF2 | 19  | 19419071 | rs739846    | A  | 1.09E-11                                             | 1.9  | 41.15  | +++       |
| TM6SF2 | 19  | 19578743 | rs73002956  | A  | 1.09E-11                                             | 1.88 | 1.57   | +++       |
| TM6SF2 | 19  | 19477877 | rs56255430  | A  | 1.28E-11                                             | 1.88 | 4.72   | +++       |
| TM6SF2 | 19  | 19467545 | rs2285626   | T  | 1.83E-11                                             | 1.75 | 54.01  | +++       |
| TM6SF2 | 19  | 19610596 | rs3794991   | T  | 2.07E-11                                             | 1.86 | 3.28   | +++       |
| TM6SF2 | 19  | 19460541 | rs73001065  | C  | 2.19E-11                                             | 1.96 | 28.52  | +++       |
| TM6SF2 | 19  | 19436229 | rs111234557 | C  | 4.46E-11                                             | 1.75 | 59.43  | +++       |
| TM6SF2 | 19  | 19462702 | rs11672355  | C  | 4.67E-11                                             | 1.75 | 59.19  | +++       |
| TM6SF2 | 19  | 19582992 | rs73002960  | T  | 6.20E-11                                             | 1.72 | 44.85  | +++       |
| TM6SF2 | 19  | 19494483 | rs150268548 | A  | 6.32E-11                                             | 1.95 | 0      | +++       |
| TM6SF2 | 19  | 19621004 | rs56273306  | T  | 6.60E-11                                             | 1.72 | 44.48  | +++       |
| TM6SF2 | 19  | 19531910 | rs11668386  | A  | 6.61E-11                                             | 1.72 | 43.7   | +++       |
| TM6SF2 | 19  | 19425025 | rs57962361  | T  | 6.88E-11                                             | 1.74 | 59.86  | +++       |
| TM6SF2 | 19  | 19366632 | rs72999033  | T  | 7.69E-11                                             | 1.97 | 10.34  | +++       |
| TM6SF2 | 19  | 19539891 | rs8182472   | T  | 8.03E-11                                             | 1.72 | 44.23  | +++       |
| TM6SF2 | 19  | 19426181 | rs11668104  | A  | 8.06E-11                                             | 1.73 | 60.03  | +++       |
| TM6SF2 | 19  | 19484008 | rs59148799  | A  | 8.25E-11                                             | 1.72 | 44     | +++       |
| TM6SF2 | 19  | 19508013 | rs10424702  | A  | 8.34E-11                                             | 1.71 | 42.5   | +++       |
| TM6SF2 | 19  | 19613622 | rs57009615  | A  | 8.91E-11                                             | 1.7  | 28.05  | +++       |
| TM6SF2 | 19  | 19548643 | rs79954596  | T  | 9.47E-11                                             | 1.71 | 43.81  | +++       |
| TM6SF2 | 19  | 19517169 | rs188552254 | A  | 9.61E-11                                             | 1.71 | 41.81  | +++       |
| TM6SF2 | 19  | 19572220 | rs28720066  | T  | 1.09E-10                                             | 1.71 | 45.39  | +++       |
| TM6SF2 | 19  | 19621197 | rs113365218 | A  | 1.38E-10                                             | 1.72 | 49.71  | +++       |
| TM6SF2 | 19  | 19658472 | rs16996148  | T  | 1.38E-10                                             | 1.82 | 0      | +++       |
| TM6SF2 | 19  | 19512657 | rs10408596  | A  | 1.48E-10                                             | 1.7  | 44.39  | +++       |
| TM6SF2 | 19  | 19505087 | rs10415849  | T  | 1.51E-10                                             | 1.7  | 44.45  | +++       |
| TM6SF2 | 19  | 19503573 | rs10408875  | T  | 1.61E-10                                             | 1.7  | 43.6   | +++       |
| TM6SF2 | 19  | 19662220 | rs17216525  | T  | 1.65E-10                                             | 1.83 | 0      | +++       |
| TM6SF2 | 19  | 19506092 | rs56241616  | T  | 1.93E-10                                             | 1.7  | 44.7   | +++       |
| TM6SF2 | 19  | 19664077 | rs17216588  | T  | 2.69E-10                                             | 1.81 | 0      | +++       |
| TM6SF2 | 19  | 19642795 | rs56397647  | T  | 3.22E-10                                             | 1.7  | 9.17   | +++       |
| TM6SF2 | 19  | 19329924 | rs2228603   | T  | 3.47E-10                                             | 1.85 | 0      | +++       |
| TM6SF2 | 19  | 19667254 | rs143988316 | T  | 4.28E-10                                             | 1.8  | 0      | +++       |
| TM6SF2 | 19  | 19675696 | rs73004933  | T  | 5.83E-10                                             | 1.8  | 0      | +++       |
| TM6SF2 | 19  | 19671266 | rs73004926  | T  | 6.08E-10                                             | 1.8  | 0      | +++       |
| TM6SF2 | 19  | 19670610 | rs150824230 | A  | 9.71E-10                                             | 1.78 | 0      | +++       |
| TM6SF2 | 19  | 19695228 | rs73004951  | T  | 9.80E-10                                             | 1.78 | 0      | +++       |
| TM6SF2 | 19  | 19711139 | rs73004959  | T  | 1.57E-09                                             | 1.76 | 0      | +++       |
| TM6SF2 | 19  | 19746151 | rs2304128   | T  | 2.00E-09                                             | 1.77 | 0      | ++++      |
| TM6SF2 | 19  | 19700552 | rs12608729  | T  | 2.26E-09                                             | 1.75 | 0      | +++       |
| TM6SF2 | 19  | 19713069 | rs73004962  | A  | 2.47E-09                                             | 1.75 | 0      | +++       |
| TM6SF2 | 19  | 19721722 | rs12610185  | A  | 3.56E-09                                             | 1.73 | 0      | +++       |
| TM6SF2 | 19  | 19716558 | rs73004966  | T  | 3.57E-09                                             | 1.74 | 0      | +++       |

|        |    |          |             |   |          |      |       |      |
|--------|----|----------|-------------|---|----------|------|-------|------|
| TM6SF2 | 19 | 19720399 | rs57504626  | T | 3.81E-09 | 1.74 | 0     | +++  |
| TM6SF2 | 19 | 19720788 | rs16996185  | T | 3.81E-09 | 1.74 | 0     | ---+ |
| TM6SF2 | 19 | 19721976 | rs12610191  | T | 3.81E-09 | 1.74 | 0     | +++  |
| TM6SF2 | 19 | 19723215 | rs10500212  | T | 3.81E-09 | 1.73 | 0     | +++  |
| TM6SF2 | 19 | 19325963 | rs3761077   | T | 4.38E-09 | 1.68 | 0     | +++  |
| TM6SF2 | 19 | 19727152 | rs73004975  | A | 4.66E-09 | 1.72 | 0     | ---+ |
| TM6SF2 | 19 | 19726022 | rs58847337  | A | 5.05E-09 | 1.72 | 0     | +++  |
| TM6SF2 | 19 | 19717056 | rs73004967  | A | 5.40E-09 | 1.82 | 0     | ---+ |
| TM6SF2 | 19 | 19702384 | rs17217098  | A | 8.56E-09 | 1.81 | 0     | +++  |
| TM6SF2 | 19 | 19336608 | rs2238675   | T | 1.18E-08 | 1.62 | 0     | +++  |
| TM6SF2 | 19 | 19394368 | rs138295924 | A | 4.64E-08 | 1.92 | 0     | ---+ |
| PNPLA3 | 22 | 44340904 | rs2294915   | T | 2.44E-19 | 1.75 | 0     | ++++ |
| PNPLA3 | 22 | 44324727 | rs738409    | G | 4.31E-19 | 1.74 | 0     | ++++ |
| PNPLA3 | 22 | 44324855 | rs3747207   | A | 4.71E-19 | 1.77 | 0     | ++++ |
| PNPLA3 | 22 | 44324730 | rs738408    | T | 5.62E-19 | 1.77 | 0     | ++++ |
| PNPLA3 | 22 | 44379565 | rs2294922   | C | 3.11E-14 | 1.62 | 16.85 | ++++ |
| PNPLA3 | 22 | 44333968 | rs2896020   | T | 1.62E-11 | 1.56 | 0     | ---- |
| PNPLA3 | 22 | 44382684 | rs2294927   | T | 1.63E-11 | 1.51 | 0     | ---- |
| PNPLA3 | 22 | 44332570 | rs2281135   | A | 1.70E-11 | 1.55 | 0     | ++++ |
| PNPLA3 | 22 | 44333694 | rs2896019   | T | 1.70E-11 | 1.55 | 0     | ---- |
| PNPLA3 | 22 | 44383400 | rs6006602   | T | 1.73E-11 | 1.51 | 0     | ++++ |
| PNPLA3 | 22 | 44334476 | rs4823176   | T | 1.86E-11 | 1.56 | 0     | ---- |
| PNPLA3 | 22 | 44333172 | rs2072906   | A | 1.87E-11 | 1.56 | 0     | ---- |
| PNPLA3 | 22 | 44333479 | rs2072905   | C | 1.87E-11 | 1.56 | 0     | ---- |
| PNPLA3 | 22 | 44333945 | rs2401512   | C | 1.87E-11 | 1.56 | 0     | ---- |
| PNPLA3 | 22 | 44335331 | rs16991175  | T | 1.87E-11 | 1.56 | 0     | ---- |
| PNPLA3 | 22 | 44335406 | rs35621602  | A | 1.87E-11 | 1.56 | 0     | ++++ |
| PNPLA3 | 22 | 44335416 | rs34352134  | T | 1.87E-11 | 1.56 | 0     | ++++ |
| PNPLA3 | 22 | 44335744 | rs2073081   | T | 1.87E-11 | 1.56 | 0     | ---- |
| PNPLA3 | 22 | 44334529 | rs4823178   | T | 1.87E-11 | 1.56 | 0     | ---- |
| PNPLA3 | 22 | 44335453 | rs34376930  | T | 1.87E-11 | 1.56 | 0     | ++++ |
| PNPLA3 | 22 | 44334486 | rs4823177   | T | 1.88E-11 | 1.56 | 0     | ---- |
| PNPLA3 | 22 | 44332878 | rs34879941  | T | 1.90E-11 | 1.56 | 0     | ++++ |
| PNPLA3 | 22 | 44336310 | rs1010022   | A | 1.91E-11 | 1.56 | 0     | ---- |
| PNPLA3 | 22 | 44336098 | rs1010023   | T | 1.96E-11 | 1.56 | 0     | ---- |
| PNPLA3 | 22 | 44341666 | rs13055900  | A | 2.00E-11 | 1.55 | 0     | ---- |
| PNPLA3 | 22 | 44341672 | rs13055874  | T | 2.04E-11 | 1.55 | 0     | ---- |
| PNPLA3 | 22 | 44340086 | rs36069781  | T | 2.10E-11 | 1.55 | 0     | ++++ |
| PNPLA3 | 22 | 44341193 | rs4823179   | T | 2.15E-11 | 1.55 | 0     | ---- |
| PNPLA3 | 22 | 44340922 | rs2294916   | T | 2.16E-11 | 1.55 | 0     | ---- |
| PNPLA3 | 22 | 44343151 | rs1810508   | A | 2.18E-11 | 1.55 | 0     | ---- |
| PNPLA3 | 22 | 44342969 | rs2008451   | T | 2.18E-11 | 1.55 | 0     | ---- |
| PNPLA3 | 22 | 44341606 | rs4823181   | T | 2.28E-11 | 1.55 | 0     | ---- |
| PNPLA3 | 22 | 44341298 | rs4823180   | A | 2.28E-11 | 1.55 | 0     | ++++ |
| PNPLA3 | 22 | 44331943 | rs1883349   | A | 2.35E-11 | 1.55 | 0     | ++++ |
| PNPLA3 | 22 | 44336957 | rs73176497  | A | 2.49E-11 | 1.55 | 0     | ++++ |
| PNPLA3 | 22 | 44339526 | rs13056555  | C | 2.66E-11 | 1.55 | 0     | ---- |
| PNPLA3 | 22 | 44336496 | rs8142145   | T | 2.66E-11 | 1.55 | 0     | ---- |
| PNPLA3 | 22 | 44337533 | rs926633    | A | 2.66E-11 | 1.55 | 0     | ++++ |
| PNPLA3 | 22 | 44345771 | rs13054885  | A | 2.73E-11 | 1.55 | 0     | ++++ |
| PNPLA3 | 22 | 44343626 | rs12484795  | A | 3.26E-11 | 1.55 | 0     | ---- |
| PNPLA3 | 22 | 44334842 | rs2281293   | T | 3.29E-11 | 1.55 | 0     | ---- |
| PNPLA3 | 22 | 44333370 | rs2076207   | A | 3.33E-11 | 1.55 | 0     | ---- |
| PNPLA3 | 22 | 44332653 | rs2072907   | C | 3.37E-11 | 1.55 | 0     | ---- |
| PNPLA3 | 22 | 44387108 | rs1986095   | A | 3.55E-11 | 1.5  | 0     | ---- |
| PNPLA3 | 22 | 44389514 | rs2235778   | T | 3.57E-11 | 1.5  | 0     | ---- |

|        |    |          |            |   |          |      |       |      |
|--------|----|----------|------------|---|----------|------|-------|------|
| PNPLA3 | 22 | 44388417 | rs3788604  | A | 3.58E-11 | 1.5  | 0     | ---- |
| PNPLA3 | 22 | 44332477 | rs2281138  | T | 3.65E-11 | 1.55 | 0     | ---- |
| PNPLA3 | 22 | 44332493 | rs2281137  | T | 3.65E-11 | 1.55 | 0     | ---- |
| PNPLA3 | 22 | 44331513 | rs1997693  | C | 4.24E-11 | 1.54 | 0     | ---- |
| PNPLA3 | 22 | 44325631 | rs12484809 | T | 4.26E-11 | 1.56 | 0     | ++++ |
| PNPLA3 | 22 | 44325565 | rs12484801 | T | 4.26E-11 | 1.56 | 0     | ++++ |
| PNPLA3 | 22 | 44325516 | rs12485100 | T | 4.28E-11 | 1.56 | 0     | ++++ |
| PNPLA3 | 22 | 44331778 | rs13056638 | C | 4.29E-11 | 1.54 | 0     | ---- |
| PNPLA3 | 22 | 44331815 | rs1883348  | C | 4.29E-11 | 1.54 | 0     | ---- |
| PNPLA3 | 22 | 44330031 | rs1977080  | T | 4.76E-11 | 1.55 | 0     | ++++ |
| PNPLA3 | 22 | 44393075 | rs6006473  | T | 4.91E-11 | 1.49 | 0     | ++++ |
| PNPLA3 | 22 | 44325996 | rs12483959 | A | 5.14E-11 | 1.56 | 0     | ++++ |
| PNPLA3 | 22 | 44326272 | rs9625962  | T | 5.36E-11 | 1.56 | 0     | ---- |
| PNPLA3 | 22 | 44327179 | rs16991158 | A | 6.36E-11 | 1.54 | 0     | ++++ |
| PNPLA3 | 22 | 44327192 | rs36055245 | A | 6.36E-11 | 1.54 | 0     | ---- |
| PNPLA3 | 22 | 44328730 | rs4823173  | A | 7.00E-11 | 1.54 | 0     | ++++ |
| PNPLA3 | 22 | 44329078 | rs2076211  | T | 7.14E-11 | 1.54 | 0     | ++++ |
| PNPLA3 | 22 | 44395451 | rs1007863  | T | 7.26E-11 | 1.49 | 0     | ---- |
| PNPLA3 | 22 | 44329275 | rs2294433  | A | 7.29E-11 | 1.54 | 0     | ++++ |
| PNPLA3 | 22 | 44395389 | rs2281292  | A | 7.29E-11 | 1.48 | 0     | ---- |
| PNPLA3 | 22 | 44330128 | rs1977081  | T | 8.72E-11 | 1.54 | 0     | ---- |
| PNPLA3 | 22 | 44326700 | rs11090617 | T | 8.76E-11 | 1.54 | 0     | ++++ |
| PNPLA3 | 22 | 44347251 | rs2092501  | A | 1.02E-10 | 1.54 | 0     | ++++ |
| PNPLA3 | 22 | 44348446 | rs34912062 | T | 1.06E-10 | 1.54 | 0     | ++++ |
| PNPLA3 | 22 | 44356468 | rs56373884 | A | 1.09E-10 | 1.53 | 0     | ++++ |
| PNPLA3 | 22 | 44327273 | rs12484700 | A | 1.31E-10 | 1.53 | 0     | ---- |
| PNPLA3 | 22 | 44361842 | rs2294921  | T | 3.46E-10 | 1.51 | 6.21  | +++- |
| PNPLA3 | 22 | 44349236 | rs1474745  | T | 3.81E-10 | 1.51 | 7.06  | ---+ |
| PNPLA3 | 22 | 44368122 | rs3761472  | A | 3.84E-10 | 1.51 | 10.13 | ---+ |
| PNPLA3 | 22 | 44376335 | rs67450864 | T | 1.67E-09 | 1.44 | 28.91 | ++++ |
| PNPLA3 | 22 | 44377442 | rs4823182  | A | 1.68E-09 | 1.44 | 28    | ---- |
| PNPLA3 | 22 | 44391686 | rs2143571  | A | 6.56E-09 | 1.47 | 0     | ++++ |
| PNPLA3 | 22 | 44391234 | rs2281298  | A | 7.20E-09 | 1.47 | 0     | ++++ |
| PNPLA3 | 22 | 44388817 | rs3827385  | T | 1.02E-08 | 1.46 | 0     | ---+ |
| PNPLA3 | 22 | 44394019 | rs2401514  | A | 1.31E-08 | 1.46 | 0     | +++- |
| PNPLA3 | 22 | 44385594 | rs2073079  | A | 1.42E-08 | 1.46 | 0     | ---+ |
| PNPLA3 | 22 | 44394402 | rs2073080  | T | 1.87E-08 | 1.45 | 0     | +++- |
| PNPLA3 | 22 | 44341986 | rs2294917  | T | 2.00E-08 | 0.65 | 0     | ++++ |
| PNPLA3 | 22 | 44378809 | rs2235777  | T | 5.95E-08 | 1.45 | 45.46 | +++- |
| PNPLA3 | 22 | 44380767 | rs12167845 | T | 5.95E-08 | 1.45 | 44.77 | ---+ |
| PNPLA3 | 22 | 44380009 | rs9626079  | A | 6.07E-08 | 1.44 | 44.82 | ---+ |
| PNPLA3 | 22 | 44379740 | rs2294923  | A | 6.08E-08 | 1.44 | 44.81 | +++- |
| PNPLA3 | 22 | 44377999 | rs2235776  | T | 6.12E-08 | 1.44 | 45.71 | +++- |
| PNPLA3 | 22 | 44381340 | rs4823108  | T | 6.21E-08 | 1.44 | 45.54 | ---+ |
| PNPLA3 | 22 | 44378672 | rs4823183  | A | 6.70E-08 | 1.44 | 45.69 | +++- |

Abbreviations: SNP: single nucleotide polymorphism; Chr: chromosome; OR: odds ratio; HetISq: I<sup>2</sup>-measure of percentage of between cohort heterogeneity Meta; P value: Significance derived from a fixed effect meta-analysis.<sup>a</sup> Odds ratio and P value adjusted for top 15 principal components of genetic ancestry; \* risk loci *TM6SF2* and *PNPLA3* annotate to multiple genes not listed in detail

**Supplementary Table 7: Known alcohol- and HCV/HBV-related HCC associated variants detailed in the current study analyses cohorts**

| Previously known HCC disease associations |               |                            |                     | Discovery cohort<br>(Current study) |                  |                        | Replication cohort 1 UK<br>(Current study) |                  |                       | Replication cohort 2 Germany<br>(Current study) |                  |         |
|-------------------------------------------|---------------|----------------------------|---------------------|-------------------------------------|------------------|------------------------|--------------------------------------------|------------------|-----------------------|-------------------------------------------------|------------------|---------|
| Study                                     | Study type    | Gene, Chrom.               | SNP (Effect Allele) | AF in Ca Co                         | Odds Ratio       | P value                | AF in Ca Co                                | Odds Ratio       | P value               | AF in Ca Co                                     | Odds Ratio       | P value |
| Trepo et al./<br>Stickel et al.           | GWAS /<br>CGS | <i>PNPLA3</i><br>(Chr 22)  | rs738409<br>(G)     | 0.48 0.35                           | 1.71 (1.49-1.96) | 7.23×10 <sup>-15</sup> | 0.49 0.30                                  | 2.20 (1.55-3.11) | 6.31×10 <sup>-6</sup> | 0.49 0.38                                       | 1.57 (0.97-2.56) | 0.068   |
| Trepo et al./<br>Stickel et al.           | GWAS /<br>CGS | <i>TM6SF2</i><br>(Chr 19)  | rs58542926<br>(T)   | 0.15 0.08                           | 1.94 (1.56-2.42) | 2.81×10 <sup>-9</sup>  | 0.21 0.09                                  | 2.55 (1.65-3.95) | 8.35×10 <sup>-6</sup> | 0.13 0.11                                       | 1.21 (0.63-2.35) | 0.565   |
| Trepo et al.                              | GWAS          | <i>WNT3A</i><br>(Chr 1)    | rs708113<br>(T)     | 0.37 0.38                           | 0.97 (0.85-1.11) | 0.678                  | 0.37 0.38                                  | 0.95 (0.70-1.29) | 0.741                 | 0.43 0.35                                       | 1.48 (0.89-2.47) | 0.132   |
| Stickel, Lutz,<br>Buch et al.             | CGS           | <i>HSD17B13</i><br>(Chr 4) | rs72613567<br>(TA)  | 0.19 0.22                           | 0.83 (0.71-0.97) | 0.020                  | 0.23 0.26                                  | 0.86 (0.61-1.21) | 0.381                 | 0.18 0.22                                       | 0.81 (0.47-1.41) | 0.457   |
| Innes et al.                              | CGS           | <i>APOE</i><br>(Chr 19)    | rs429358<br>(C)     | 0.09 0.12                           | 0.74 (0.60-0.92) | 6.35×10 <sup>-3</sup>  | 0.07 0.14                                  | 0.51 (0.28-0.93) | 0.027                 | 0.13 0.15                                       | 0.84 (0.42-1.70) | 0.633   |
| Innes et al.                              | CGS           | <i>TM6SF2</i><br>(Chr 19)  | rs187429064<br>(G)  | 0.02 0.01                           | 1.82 (1.10-3.00) | 0.019                  | 0.08 0.02                                  | 3.21 (1.67-6.18) | 4.79×10 <sup>-4</sup> | 0.01 0.02                                       | 0.71 (0.05-9.78) | 0.799   |
| Miki et. al                               | GWAS<br>(HCV) | <i>DEPDC5</i><br>(Chr 22)  | rs1012068<br>(G)    | 0.27 0.24                           | 1.15 (0.99-1.35) | 0.069                  | 0.27 0.23                                  | 1.36 (0.91-2.02) | 0.134                 | 0.28 0.28                                       | 1.00 (0.59-1.68) | 1       |
| Jiang et al.                              | GWAS<br>(HBV) | <i>STAT4</i><br>(Chr 2)    | rs7574865<br>(G)    | 0.77 0.78                           | 0.97 (0.83-1.14) | 0.730                  | 0.76 0.77                                  | 0.88 (0.58-1.32) | 0.529                 | 0.76 0.81                                       | 0.74 (0.42-1.30) | 0.316   |
| Jiang et al.                              | GWAS<br>(HBV) | <i>HLA-DQ</i><br>(Chr 6)   | rs9275319<br>(A)    | 0.88 0.87                           | 1.03 (0.83-1.27) | 0.799                  | 0.86 0.89                                  | 0.78 (0.43-1.43) | 0.443                 | 0.86 0.86                                       | 0.94 (0.49-1.80) | 0.859   |

AF: Allele frequency, Ca: Cases (ArC with HCC), Co: Controls (ArC without HCC). Trepo et al.: Common genetic variation in alcohol-related HCC: a case-control genome-wide association study. *The Lancet Oncology* Dec 2021; Stickel, Lutz, Buch et al.: Genetic Variation in *HSD17B13* Reduces the Risk of Developing Cirrhosis and HCC in Alcohol Misusers. *Hepatology* Jul 2020; Innes et al.: The rs429358 locus in *APOE* is associated with HCC in patients with cirrhosis. *Hepatology Communications* Dec 2021; Stickel et al.: Genetic variants in *PNPLA3* and *TM6SF2* predispose to the development of HCC in individuals with ArC. *Am J Gastroenterol.* 2018 Oct; Miki et.al.: Variation in the *DEPDC5* locus is associated with progression to HCC in chronic hepatitis C virus carriers. *Nature Genetics* Jul 2011.; Jiang et al.: Genetic variants in *STAT4* and *HLA-DQ* genes confer risk of hepatitis B virus-related HCC. *Nature Genetics* Jan 2013.

**Supplementary Table 8: Univariate analyses for association of *TERT* rs2242652 with alcohol-related cirrhosis and HCC in the whole cohort**

| Cohorts                                               | <i>TERT</i><br>(rs2242652) | Comparative groups |            | Genotypic<br>OR (95% CI),<br>P value | Allelic<br>OR (95% CI),<br>P value | Cases /<br>Controls (n) |
|-------------------------------------------------------|----------------------------|--------------------|------------|--------------------------------------|------------------------------------|-------------------------|
| Alcoholic-related cirrhosis and HCC<br><b>(HCC)</b>   |                            | <b>HCC</b>         | <b>ArC</b> |                                      |                                    |                         |
|                                                       | G G                        | 919                | 1201       |                                      |                                    |                         |
|                                                       | A G                        | 273                | 588        | 0.61 (0.51-0.72)                     | 0.62 (0.53-0.71)                   | 1214   1859             |
|                                                       | A A                        | 22                 | 70         | 0.41 (0.25-0.67)                     |                                    |                         |
|                                                       | MAF                        | 0.131              | 0.196      | $2.32 \times 10^{-10}$               | $2.81 \times 10^{-11}$             |                         |
| Alcohol-related cirrhosis without HCC<br><b>(ArC)</b> |                            | <b>ArC</b>         | <b>AM</b>  |                                      |                                    |                         |
|                                                       | G G                        | 1201               | 981        |                                      |                                    |                         |
|                                                       | A G                        | 588                | 479        | 1.00 (0.87-1.16)                     | 0.99 (0.88-1.12)                   | 1859   1520             |
|                                                       | A A                        | 70                 | 60         | 0.95 (0.67-1.36)                     |                                    |                         |
|                                                       | MAF                        | 0.196              | 0.197      | 0.963                                | 0.899                              |                         |
| Alcohol misusers<br><b>(AM)</b>                       |                            | <b>HCC</b>         | <b>AM</b>  |                                      |                                    |                         |
|                                                       | G G                        | 919                | 981        |                                      |                                    |                         |
|                                                       | A G                        | 273                | 479        | 0.61 (0.51-0.72)                     | 0.61 (0.53-0.71)                   | 1214   1520             |
|                                                       | A A                        | 22                 | 60         | 0.39 (0.24-0.64)                     |                                    |                         |
|                                                       | MAF                        | 0.131              | 0.197      | $6.38 \times 10^{-10}$               | $6.13 \times 10^{-11}$             |                         |

CI: confidence intervals, MAF: minor allele frequency, OR: odds ratio. Genotype counts reflect the rounded sum of imputed genotype probabilities for individuals in the sample. Genotypic odds ratios for heterozygous and homozygous carriage of the rare allele and allelic odds ratios were calculated from  $2 \times 2$  tables on genotype counts. Significance was calculated as one degree of freedom Chi-squared test of allelic counts and 2 degree of freedom Chi-squared test of genotype counts.



**Supplementary Table 9: Univariate analyses for association of *PNPLA3* rs738409 with alcohol-related cirrhosis and HCC in the whole cohort**

| Cohorts                                               | <i>PNPLA3</i><br>(rs738409) | Comparative groups |            | Genotypic<br>OR (95% CI),<br>P value | Allelic<br>OR (95% CI),<br>P value | Cases/<br>Controls (n) |
|-------------------------------------------------------|-----------------------------|--------------------|------------|--------------------------------------|------------------------------------|------------------------|
| Alcoholic-related cirrhosis and HCC<br><b>(HCC)</b>   |                             | <b>HCC</b>         | <b>ArC</b> |                                      |                                    |                        |
|                                                       | C C                         | 339                | 840        |                                      |                                    |                        |
|                                                       | C G                         | 576                | 799        | 1.79 (1.51-2.11)                     | 1.85 (1.67-2.06)                   | 1214   1866            |
|                                                       | G G                         | 229                | 227        | 3.26 (2.64-4.04)                     |                                    |                        |
|                                                       | MAF                         | 0.484              | 0.336      | $3.28 \times 10^{-28}$               | $4.15 \times 10^{-31}$             |                        |
| Alcohol-related cirrhosis without HCC<br><b>(ArC)</b> |                             | <b>ArC</b>         | <b>AM</b>  |                                      |                                    |                        |
|                                                       | C C                         | 840                | 887        |                                      |                                    |                        |
|                                                       | C G                         | 799                | 495        | 1.70 (1.47-1.97)                     | 1.85 (1.65-2.06)                   | 1866   1455            |
|                                                       | G G                         | 227                | 63         | 3.80 (2.83-5.11)                     |                                    |                        |
|                                                       | MAF                         | 0.336              | 0.215      | $1.99 \times 10^{-25}$               | $2.52 \times 10^{-27}$             |                        |
| Alcohol misusers<br><b>(AM)</b>                       |                             | <b>HCC</b>         | <b>AM</b>  |                                      |                                    |                        |
|                                                       | C C                         | 339                | 887        |                                      |                                    |                        |
|                                                       | C G                         | 576                | 495        | 3.04 (2.56-3.62)                     | 3.42 (3.04-3.85)                   | 1214   1455            |
|                                                       | G G                         | 229                | 63         | 12.42 (9.21-16.75)                   |                                    |                        |
|                                                       | MAF                         | 0.484              | 0.215      | $6.21 \times 10^{-85}$               | $1.29 \times 10^{-94}$             |                        |

CI: confidence intervals, MAF: minor allele frequency, OR: odds ratio. Genotype counts reflect the rounded sum of imputed genotype probabilities for individuals in the sample. Genotypic odds ratios for heterozygous and homozygous carriership of the rare allele and allelic odds ratios were calculated from 2 × 2 tables on genotype counts. Significance was calculated as one degree of freedom Chi-squared test of allelic counts and 2 degree of freedom Chi-squared test of genotype counts.

**Supplementary Table 10: Univariate analyses for association of *TM6SF2* rs58542926 with alcohol-related cirrhosis and HCC in the whole cohort**

| Cohorts                                               | <i>TM6SF2</i><br>(rs58542926) | Comparative groups |            | Genotypic<br>OR (95% CI),<br>P value | Allelic<br>OR (95% CI),<br>P value | Cases/<br>Controls (n) |
|-------------------------------------------------------|-------------------------------|--------------------|------------|--------------------------------------|------------------------------------|------------------------|
| Alcoholic-related cirrhosis and HCC<br><b>(HCC)</b>   |                               | <b>HCC</b>         | <b>ArC</b> |                                      |                                    |                        |
|                                                       | C C                           | 890                | 1545       |                                      |                                    |                        |
|                                                       | C T                           | 285                | 300        | 1.65 (1.37-1.98)                     | 1.74 (1.49-2.04)                   | 1214   1866            |
|                                                       | T T                           | 39                 | 21         | 3.22 (1.88-5.52)                     |                                    |                        |
|                                                       | MAF                           | 0.150              | 0.092      | $1.02 \times 10^{-10}$               | $3.14 \times 10^{-12}$             |                        |
| Alcohol-related cirrhosis without HCC<br><b>(ArC)</b> |                               | <b>ArC</b>         | <b>AM</b>  |                                      |                                    |                        |
|                                                       | C C                           | 1545               | 1283       |                                      |                                    |                        |
|                                                       | C T                           | 300                | 167        | 1.49 (1.22-1.83)                     | 1.56 (1.29-1.88)                   | 1866   1455            |
|                                                       | T T                           | 21                 | 5          | 3.49 (1.31-9.28)                     |                                    |                        |
|                                                       | MAF                           | 0.092              | 0.061      | $2.19 \times 10^{-5}$                | $3.44 \times 10^{-6}$              |                        |
| Alcohol misusers<br><b>(AM)</b>                       |                               | <b>HCC</b>         | <b>AM</b>  |                                      |                                    |                        |
|                                                       | C C                           | 890                | 1283       |                                      |                                    |                        |
|                                                       | C T                           | 285                | 167        | 2.46 (2.00-3.03)                     | 2.71 (2.25-3.28)                   | 1214   1455            |
|                                                       | T T                           | 39                 | 5          | 11.24 (4.41-28.64)                   |                                    |                        |
|                                                       | MAF                           | 0.150              | 0.061      | $5.09 \times 10^{-24}$               | $1.02 \times 10^{-26}$             |                        |

CI: confidence intervals, MAF: minor allele frequency, OR: odds ratio. Genotype counts reflect the rounded sum of imputed genotype probabilities for individuals in the sample. Genotypic odds ratios for heterozygous and homozygous carriership of the rare allele and allelic odds ratios were calculated from  $2 \times 2$  tables on genotype counts. Significance was calculated as one degree of freedom Chi-squared test of allelic counts.

Supplementary Table 11: Finemapping, conditional analysis and expression analysis of the *TERT* Locus

| GWAS | TERT Gene Variants Annotation |           |          |          | Discov. | Meta-analysis stage 1&2 |       |         |        | MAF   |       | Imputation |      | Conditional A. |        | LD    | Expression |           | Leukocyte telomere length |          |     |
|------|-------------------------------|-----------|----------|----------|---------|-------------------------|-------|---------|--------|-------|-------|------------|------|----------------|--------|-------|------------|-----------|---------------------------|----------|-----|
| TOP  | SNP:ALT                       | Pos Chr 5 | Type     | Location | Pgwas   | Pfix                    | ORfix | Prand   | ORrand | Ca    | Co    | Type       | Rsq  | Pcon           | R2Lead | Block | eQTL_P     | Zscore    | Beta                      | P_Telo   | TOP |
|      | rs35535053:T                  | 1252972   | downstr. | DIST=315 | 0.396   | 0.49                    | 0.83  | 0.69    | 0.86   | 0.016 | 0.018 | Imp        | 0.74 | 0.918          | 0.016  | B-1   | 0.71       | 0.37 (T)  | -                         | -        |     |
|      | rs2853690:A                   | 1253744   | 3'UTR    | EX=16/16 | 0.531   | 0.83                    | 0.98  | 0.83    | 0.98   | 0.173 | 0.179 | Imp        | 0.90 | 0.277          | 0.005  | B-1   | 0.71       | 0.37 (A)  | -0.0010                   | 7.99E-08 |     |
|      | rs35033501:T                  | 1253918   | synonym  | EX=16/16 | 9.1E-3  | 0.02                    | 1.67  | 0.02    | 1.67   | 0.035 | 0.021 | Imp        | 0.85 | 0.023          | 0.003  | B-1   | 0.44       | 0.77 (T)  | 0.0001                    | 0.885    |     |
|      | rs35719940:T                  | 1254594   | missense | EX=15/16 | 0.386   | 0.25                    | 1.31  | 0.25    | 1.31   | 0.021 | 0.017 | Imp        | 0.85 | 0.612          | 0.004  | B-1   | 0.17       | 1.37 (T)  | 0.0021                    | 8.17E-06 |     |
|      | rs33954691:A                  | 1255520   | synonym  | EX=14/16 | 0.084   | 0.05                    | 1.24  | 0.05    | 1.24   | 0.103 | 0.088 | Imp        | 0.88 | 0.155          | 0.008  | B-1   | 5.0E-5     | -4.05 (A) | 0.0004                    | 0.119    |     |
|      | rs35387865:T                  | 1255844   | intronic | IN=13/15 | 0.280   | 0.31                    | 1.33  | 0.31    | 1.33   | 0.017 | 0.013 | Imp        | 0.86 | 0.448          | 0.004  | B-1   | 0.87       | 0.17 (T)  | 0.0055                    | 5.58E-16 |     |
|      | rs2853687:A                   | 1256585   | intronic | IN=13/15 | 0.857   | 0.94                    | 1.01  | 0.94    | 1.01   | 0.265 | 0.273 | Imp        | 0.96 | 0.335          | 0.023  | B-1   | 0.72       | -0.35 (A) | -0.0009                   | 5.81E-08 |     |
|      | rs35041195:T                  | 1257288   | intronic | IN=13/15 | 0.801   | 0.55                    | 0.94  | 0.55    | 0.94   | 0.119 | 0.128 | Imp        | 0.90 | 0.573          | 0.002  | B-1   | 0.96       | 0.05 (T)  | -0.0018                   | 7.79E-12 |     |
|      | rs2736122:A                   | 1257621   | intronic | IN=13/15 | 0.389   | 0.62                    | 0.97  | 0.62    | 0.97   | 0.261 | 0.280 | Gen        | 0.99 | 0.133          | 0.014  | B-1   | 0.60       | -0.52 (A) | -0.0007                   | 1.54E-05 |     |
|      | rs144704378:T                 | 1259489   | intronic | IN=12/15 | 0.028   | 0.03                    | 1.39  | 0.03    | 1.39   | 0.054 | 0.041 | Imp        | 0.94 | 0.072          | 0.007  | B-1   | 0.01       | -2.44 (T) | 0.0008                    | 0.021    |     |
|      | rs2736118:C                   | 1260195   | intronic | IN=12/15 | 0.530   | 0.60                    | 0.96  | 0.60    | 0.96   | 0.262 | 0.278 | Imp        | 0.98 | 0.204          | 0.014  | B-1   | 0.73       | -0.35 (C) | -0.0006                   | 4.62E-05 |     |
|      | rs34041736:T                  | 1261051   | intronic | IN=11/15 | 0.518   | 0.38                    | 1.17  | 0.38    | 1.17   | 0.036 | 0.033 | Imp        | 0.90 | 0.739          | 0.005  | B-1   | 0.21       | 1.24 (T)  | -0.0033                   | 5.87E-15 |     |
|      | rs11133715:A                  | 1261052   | intronic | IN=11/15 | 0.063   | 0.08                    | 0.88  | 0.08    | 0.88   | 0.329 | 0.344 | Imp        | 0.90 | 0.452          | 0.051  | B-1   | 0.13       | 1.51 (A)  | -                         | -        |     |
|      | rs36077395:A                  | 1261220   | intronic | IN=11/15 | 0.679   | 0.53                    | 1.18  | 0.53    | 1.18   | 0.016 | 0.015 | Imp        | 0.87 | 0.854          | 0.002  | B-1   | 0.25       | 1.14 (A)  | -0.0012                   | 0.020    |     |
|      | rs34529095:C                  | 1263408   | intronic | IN=11/15 | 0.749   | 0.87                    | 0.97  | 0.97    | 1.01   | 0.031 | 0.030 | Imp        | 0.80 | 0.492          | 0.026  | B-1   | 0.07       | 1.84 (C)  | 0.0011                    | 0.014    |     |
|      | rs2736115:T                   | 1264068   | intronic | IN=11/15 | 0.420   | 0.61                    | 0.97  | 0.61    | 0.97   | 0.259 | 0.276 | Imp        | 0.95 | 0.143          | 0.015  | B-1   | 0.77       | -0.29 (T) | -0.0008                   | 1.16E-06 |     |
|      | rs2853685:G                   | 1264152   | intronic | IN=11/15 | 0.463   | 0.68                    | 0.97  | 0.68    | 0.97   | 0.270 | 0.285 | Imp        | 0.94 | 0.152          | 0.017  | B-1   | 0.80       | -0.25 (G) | -0.0009                   | 7.74E-09 |     |
|      | rs2736114:T                   | 1265204   | intronic | IN=10/15 | 0.422   | 0.65                    | 0.97  | 0.65    | 0.97   | 0.260 | 0.277 | Imp        | 0.95 | 0.142          | 0.015  | B-1   | 0.75       | -0.32 (T) | -0.0008                   | 3.69E-07 |     |
|      | rs2736113:A                   | 1265373   | intronic | IN=10/15 | 0.376   | 0.60                    | 0.96  | 0.60    | 0.96   | 0.259 | 0.277 | Imp        | 0.95 | 0.120          | 0.015  | B-1   | 0.77       | -0.29 (A) | -0.0008                   | 4.05E-07 |     |
|      | rs2736111:A                   | 1265935   | intronic | IN=10/15 | 0.404   | 0.63                    | 0.97  | 0.63    | 0.97   | 0.259 | 0.277 | Imp        | 0.95 | 0.133          | 0.015  | B-1   | 0.78       | -0.28 (A) | -0.0008                   | 8.65E-07 |     |
|      | rs2853684:C                   | 1266226   | intronic | IN=10/15 | 0.515   | 0.75                    | 0.98  | 0.75    | 0.98   | 0.262 | 0.278 | Imp        | 0.95 | 0.182          | 0.016  | B-1   | 0.76       | -0.3 (C)  | -0.0008                   | 1.67E-06 |     |
|      | rs2075786:G                   | 1266310   | intronic | IN=10/15 | 5.8E-3  | 5.7E-03                 | 0.82  | 5.7E-03 | 0.82   | 0.623 | 0.659 | Imp        | 0.88 | 0.061          | 0.035  | B-1   | 0.49       | -0.7 (A)  | -                         | -        |     |
|      | rs3891054:G                   | 1267202   | intronic | IN=9/15  | 0.374   | 0.27                    | 1.11  | 0.27    | 1.11   | 0.147 | 0.146 | Imp        | 0.87 | 0.974          | 0.025  | B-2   | N/A        | N/A       | -0.0014                   | 2.16E-08 |     |
|      | rs34194491:C                  | 1267213   | intronic | IN=9/15  | 0.024   | 0.02                    | 1.61  | 0.02    | 1.61   | 0.033 | 0.022 | Gen        | 1.00 | 0.051          | 0.004  | B-2   | 0.01       | -2.5 (C)  | 0.0010                    | 0.042    |     |
|      | rs4246742:A                   | 1267356   | intronic | IN=9/15  | 0.042   | 0.03                    | 1.22  | 0.03    | 1.22   | 0.179 | 0.159 | Imp        | 0.88 | 0.259          | 0.030  | B-2   | N/A        | N/A       | -                         | -        |     |
|      | rs35812074:G                  | 1267881   | intronic | IN=9/15  | 0.218   | 0.18                    | 1.42  | 0.18    | 1.42   | 0.020 | 0.015 | Imp        | 0.75 | 0.379          | 0.004  | B-2   | N/A        | N/A       | 0.0061                    | 3.86E-25 |     |
|      | rs114401494:T                 | 1269161   | intronic | IN=8/15  | 0.248   | 0.23                    | 0.74  | 0.23    | 0.74   | 0.016 | 0.027 | Imp        | 0.88 | 0.124          | 0.005  | B-2   | 0.31       | 1.03 (T)  | -                         | -        |     |
|      | rs11742908:G                  | 1270983   | intronic | IN=8/15  | 5.0E-3  | 4.1E-03                 | 0.77  | 4.1E-03 | 0.77   | 0.154 | 0.185 | Imp        | 0.87 | 0.306          | 0.516  | B-2   | N/A        | N/A       | -                         | -        |     |
|      | rs11133719:C                  | 1271524   | intronic | IN=7/15  | 0.172   | 0.11                    | 0.86  | 0.11    | 0.86   | 0.832 | 0.849 | Imp        | 0.84 | 0.631          | 0.030  | B-2   | 0.02       | -2.37 (T) | -                         | -        |     |
|      | rs13172201:C                  | 1271661   | intronic | IN=7/15  | 4.9E-3  | 3.9E-03                 | 1.25  | 3.9E-03 | 1.25   | 0.284 | 0.252 | Imp        | 0.91 | 0.099          | 0.055  | B-2   | 0.75       | -0.31 (C) | -                         | -        |     |

|              |                     |                    |                 |                 |                |                |                |                |                |                      |                      |             |              |              |              |               |                 |                 |                  |                  |
|--------------|---------------------|--------------------|-----------------|-----------------|----------------|----------------|----------------|----------------|----------------|----------------------|----------------------|-------------|--------------|--------------|--------------|---------------|-----------------|-----------------|------------------|------------------|
| 4            | rs35517815:A        | 1274445            | intronic        | IN=6/15         | 1.7E-4         | 1.5E-04        | 5.11           | 1.5E-04        | 5.11           | 0.020   0.006        | Imp                  | 0.73        | 0.0004       | 0.002        |              | 0.37          | 0.9 (A)         | -               | -                |                  |
|              | rs4975605:A         | 1275528            | intronic        | IN=6/15         | 0.505          | 0.68           | 0.97           | 0.68           | 0.97           | 0.462   0.469        | Imp                  | 0.92        | 0.060        | 0.061        |              | 0.04          | -2.04 (A)       | -               | -                |                  |
|              | rs145685051:G       | 1276736            | intronic        | IN=6/15         | 0.869          | 0.80           | 1.07           | 0.80           | 1.07           | 0.018   0.016        | Imp                  | 0.88        | 0.038        | 0.109        |              | 0.68          | 0.41 (G)        | 0.0033          | 3.74E-09         |                  |
| 6            | rs56345976:A        | 1276873            | intronic        | IN=6/15         | 8.7E-4         | 7.2E-04        | 0.80           | 7.2E-04        | 0.80           | 0.569   0.624        | Gen                  | 0.99        | 0.070        | 0.107        |              | 0.002         | -3.13 (G)       | -               | -                |                  |
|              | rs33961405:A        | 1277577            | intronic        | IN=6/15         | 0.682          | 0.51           | 1.05           | 0.51           | 1.05           | 0.533   0.534        | Imp                  | 0.93        | 0.100        | 0.150        | B-3          | 0.74          | -0.34 (A)       | -               | -                |                  |
|              | rs144020096:A       | 1278447            | intronic        | IN=6/15         | 0.116          | 0.06           | 0.54           | 0.06           | 0.54           | 0.008   0.015        | Imp                  | 0.95        | 0.740        | 0.066        | B-3          | 0.43          | -0.78 (A)       | -0.0008         | 0.278            |                  |
|              | rs2075785:T         | 1278584            | intronic        | IN=6/15         | 0.199          | 0.07           | 1.18           | 0.07           | 1.18           | 0.135   0.128        | Imp                  | 0.94        | 0.691        | 0.029        | B-3          | 0.37          | 0.90 (T)        | -0.0034         | 6.56E-48         |                  |
|              | rs35241335:G        | 1279224            | intronic        | IN=5/15         | 0.260          | 0.08           | 1.23           | 0.08           | 1.23           | 0.077   0.075        | Imp                  | 0.94        | 0.697        | 0.016        | B-3          | 0.55          | 0.59 (G)        | -0.0036         | 4.40E-29         |                  |
| <b>Top 2</b> | <b>rs10069690:T</b> | <b>1279790</b>     | <b>intronic</b> | <b>IN=4/15</b>  | <b>5.7E-6</b>  | <b>5.2E-08</b> | <b>0.66</b>    | <b>5.2E-08</b> | <b>0.66</b>    | <b>0.183   0.242</b> | <b>Gen</b>           | <b>1.00</b> | <b>0.485</b> | <b>0.696</b> | <b>B-3</b>   | <b>0.003</b>  | <b>2.96 (T)</b> | <b>0.0031</b>   | <b>4.08E-84</b>  |                  |
| 9            | rs10054203:C        | 1279964            | intronic        | IN=4/15         | 3.4E-3         | 7.6E-04        | 0.79           | 0.03           | 0.76           | 0.352   0.392        | Imp                  | 0.95        | 0.967        | 0.328        | B-3          | 0.04          | 2.01 (C)        | 0.0036          | 8.83E-133        |                  |
| <b>Top 1</b> | <b>rs2242652:A</b>  | <b>1280028</b>     | <b>intronic</b> | <b>IN=4/15</b>  | <b>7.9E-7</b>  | <b>6.4E-09</b> | <b>0.61</b>    | <b>6.4E-09</b> | <b>0.61</b>    | <b>0.133   0.191</b> | <b>Gen</b>           | <b>1.00</b> | <b>NA</b>    | <b>1.000</b> | <b>B-3</b>   | <b>1.4E-5</b> | <b>4.35 (A)</b> | <b>0.0026</b>   | <b>2.12E-44</b>  |                  |
| 10           | rs7734992:C         | 1280128            | intronic        | IN=4/15         | 0.019          | 9.3E-04        | 0.81           | 5.9E-03        | 0.78           | 0.367   0.401        | Imp                  | 0.96        | 0.555        | 0.315        | B-3          | 0.04          | 2.03 (C)        | 0.0041          | 2.15E-168        |                  |
|              | rs13167280:A        | 1280477            | intronic        | IN=3/15         | 0.099          | 0.12           | 1.15           | 0.12           | 1.15           | 0.158   0.139        | Imp                  | 0.95        | 0.482        | 0.033        | B-3          | 0.26          | -1.13 (A)       | 0.0026          | 3.28E-32         |                  |
|              | rs4975538:C         | 1280830            | intronic        | IN=3/15         | 3.9E-3         | 2.0E-04        | 0.78           | 2.0E-04        | 0.78           | 0.316   0.356        | Imp                  | 0.95        | 0.826        | 0.383        | B-3          | 0.01          | 2.57 (C)        | 0.0039          | 5.02E-145        |                  |
|              | <b>rs7726159:A</b>  | <b>1282319</b>     | <b>intronic</b> | <b>IN=3/15</b>  | <b>5.2E-3</b>  | <b>1.6E-04</b> | <b>0.78</b>    | <b>9.2E-03</b> | <b>0.72</b>    | <b>0.292   0.329</b> | <b>Imp</b>           | <b>0.99</b> | <b>0.795</b> | <b>0.354</b> | <b>B-3</b>   | <b>0.02</b>   | <b>2.32 (A)</b> | <b>0.0048</b>   | <b>1.16E-219</b> |                  |
| 8            | rs7725218:A         | 1282414            | intronic        | IN=3/15         | 3.2E-3         | 8.1E-05        | 0.77           | 4.4E-03        | 0.73           | 0.302   0.342        | Gen                  | 1.00        | 0.997        | 0.334        | B-3          | 0.05          | 1.96 (A)        | 0.0045          | 2.77E-198        |                  |
|              | rs7713218:G         | 1283312            | intronic        | IN=2/15         | 0.018          | 3.7E-03        | 1.20           | 3.7E-03        | 1.20           | 0.554   0.523        | Imp                  | 0.95        | 0.830        | 0.185        | B-3          | 0.004         | 2.87 (A)        | 0.0033          | 5.31E-114        |                  |
| <b>Top 3</b> | <b>rs72709458:T</b> | <b>1283755</b>     | <b>intronic</b> | <b>IN=2/15</b>  | <b>3.9E-5</b>  | <b>2.9E-07</b> | <b>0.66</b>    | <b>1.1E-03</b> | <b>0.58</b>    | <b>0.156   0.208</b> | <b>Imp</b>           | <b>0.97</b> | <b>0.771</b> | <b>0.749</b> | <b>B-3</b>   | <b>3.4E-5</b> | <b>4.14 (T)</b> | <b>0.0034</b>   | <b>1.10E-81</b>  |                  |
| 5            | rs6420019:C         | 1283841            | intronic        | IN=2/15         | 0.656          | 0.32           | 0.91           | 0.32           | 0.91           | 0.845   0.852        | Imp                  | 0.89        | 0.595        | 0.034        | B-3          | 0.57          | -0.57 (A)       | -0.0019         | 4.95E-20         |                  |
|              | rs6420020:C         | 1284046            | intronic        | IN=2/15         | 0.651          | 0.31           | 0.91           | 0.32           | 0.90           | 0.845   0.852        | Imp                  | 0.89        | 0.600        | 0.034        | B-3          | 0.62          | -0.5 (T)        | -0.0019         | 3.03E-20         |                  |
|              |                     | <b>rs4449583:T</b> | <b>1284135</b>  | <b>intronic</b> | <b>IN=2/15</b> | <b>5.3E-3</b>  | <b>2.2E-04</b> | <b>0.78</b>    | <b>1.5E-03</b> | <b>0.77</b>          | <b>0.291   0.329</b> | <b>Imp</b>  | <b>0.99</b>  | <b>0.796</b> | <b>0.353</b> | <b>B-3</b>    | <b>0.02</b>     | <b>2.27 (T)</b> | <b>0.0048</b>    | <b>9.93E-215</b> |
|              | rs35029535:T        | 1284976            | intronic        | IN=2/15         | 0.165          | 0.13           | 1.10           | 0.13           | 1.10           | 0.406   0.377        | Imp                  | 0.95        | 0.687        | 0.125        | B-3          | 0.02          | -2.31 (T)       | -0.0017         | 9.77E-30         |                  |
|              |                     | <b>rs7705526:A</b> | <b>1285974</b>  | <b>intronic</b> | <b>IN=2/15</b> | <b>0.046</b>   | <b>3.3E-03</b> | <b>0.82</b>    | <b>6.6E-03</b> | <b>0.81</b>          | <b>0.295   0.322</b> | <b>Gen</b>  | <b>1.00</b>  | <b>0.647</b> | <b>0.210</b> | <b>B-3</b>    | <b>0.27</b>     | <b>1.1 (A)</b>  | <b>0.0052</b>    | <b>1.64E-245</b> |
|              | rs2736100:A         | 1286516            | intronic        | IN=2/15         | 0.333          | 0.07           | 1.12           | 0.12           | 1.18           | 0.536   0.528        | Gen                  | 1.00        | 0.230        | 0.162        | B-3          | 0.11          | -1.61 (A)       | -0.0039         | 1.47E-166        |                  |
|              | rs2853677:A         | 1287194            | intronic        | IN=2/15         | 0.022          | 0.01           | 1.18           | 0.01           | 1.18           | 0.596   0.571        | Gen                  | 0.99        | 0.349        | 0.077        | B-4          | 0.11          | 1.58 (G)        | 0.0036          | 1.31E-139        |                  |
|              | rs35838177:T        | 1287290            | intronic        | IN=2/15         | 0.554          | 0.43           | 1.14           | 0.43           | 1.14           | 0.04   0.031         | Gen                  | 0.99        | 0.492        | 0.000        | B-4          | 0.87          | -0.17 (T)       | 0.0001          | 0.891            |                  |
|              | rs2736099:G         | 1287340            | intronic        | IN=2/15         | 0.504          | 0.27           | 1.08           | 0.35           | 1.11           | 0.661   0.655        | Imp                  | 0.94        | 0.686        | 0.047        | B-4          | 0.78          | 0.28 (A)        | 0.0040          | 8.35E-146        |                  |
|              |                     | rs7710703:C        | 1287505         | intronic        | IN=2/15        | 6.6E-4         | 7.9E-05        | 1.47           | 0.02           | 1.57                 | 0.888   0.859        | Imp         | 0.89         | 0.146        | 0.164        | B-5           | 0.002           | 3.16 (T)        | 0.0015           | 3.16E-12         |
|              | rs2853676:C         | 1288547            | intronic        | IN=2/15         | 0.168          | 0.04           | 1.15           | 0.04           | 1.15           | 0.753   0.740        | Gen                  | 1.00        | 0.642        | 0.132        | B-5          | 0.31          | 1.02 (T)        | 0.0020          | 1.71E-37         |                  |
|              | rs34677523:A        | 1288883            | intronic        | IN=2/15         | 0.165          | 0.40           | 0.79           | 0.92           | 1.08           | 0.012   0.020        | Imp                  | 0.87        | 0.107        | 0.001        | B-5          | N/A           | N/A             | -               | -                |                  |
|              | rs72709460:A        | 1289220            | intronic        | IN=2/15         | 0.571          | 0.57           | 1.22           | 0.57           | 1.22           | 0.012   0.010        | Imp                  | 0.77        | 0.696        | 0.001        | B-5          | 0.39          | -0.85 (A)       | -               | -                |                  |
|              | rs115451758:A       | 1289277            | intronic        | IN=2/15         | 0.223          | 0.19           | 1.61           | 0.19           | 1.61           | 0.012   0.007        | Imp                  | 0.94        | 0.302        | 0.001        | B-5          | 0.005         | -2.79 (A)       | -               | -                |                  |
|              | rs796501027:T       | 1291530            | intronic        | IN=2/15         | 0.052          | 0.02           | 1.41           | 0.71           | 1.24           | 0.127   0.113        | Imp                  | 0.43        | 0.192        | 0.008        | B-5          | N/A           | N/A             | -               | -                |                  |

|   |               |         |          |           |        |         |      |      |      |               |     |      |       |       |     |        |           |         |          |
|---|---------------|---------|----------|-----------|--------|---------|------|------|------|---------------|-----|------|-------|-------|-----|--------|-----------|---------|----------|
|   | rs56023411:T  | 1291740 | intronic | IN=2/15   | 7.0E-3 | 3.2E-03 | 1.32 | 0.13 | 1.38 | 0.804   0.778 | Imp | 0.77 | 0.632 | 0.226 | B-5 | 0.004  | 2.84 (G)  | -       | -        |
|   | rs71595003:A  | 1292118 | intronic | IN=2/15   | 0.031  | 0.03    | 1.51 | 0.07 | 1.50 | 0.035   0.022 | Gen | 0.99 | 0.073 | 0.005 | B-5 | 0.63   | 0.48 (A)  | 0.0000  | 0.982    |
|   | rs35334674:A  | 1292299 | intronic | IN=2/15   | 0.051  | 0.06    | 0.70 | 0.80 | 0.88 | 0.030   0.038 | Imp | 0.85 | 0.030 | 0.002 | B-5 | 0.89   | 0.14 (A)  | 0.0010  | 0.014    |
|   | rs114616103:T | 1292958 | intronic | IN=2/15   | 0.294  | 0.09    | 0.72 | 0.10 | 0.29 | 0.025   0.031 | Gen | 1.00 | 0.571 | 0.011 | B-5 | 0.19   | -1.31 (T) | -0.0039 | 8.23E-21 |
|   | rs2853672:A   | 1292983 | intronic | IN=2/15   | 0.044  | 0.01    | 1.17 | 0.15 | 1.21 | 0.527   0.507 | Gen | 1.00 | 0.441 | 0.062 | B-5 | 0.69   | -0.4 (A)  | -0.0030 | 2.91E-99 |
|   | rs79662648:G  | 1293389 | intronic | IN=2/15   | 0.392  | 0.19    | 1.24 | 0.19 | 1.24 | 0.040   0.031 | Imp | 0.95 | 0.498 | 0.001 | B-5 | N/A    | N/A       | -0.0009 | 0.027    |
|   | rs2736098:T   | 1294086 | synonym  | EX=2/16   | 0.398  | 0.26    | 1.08 | 0.40 | 1.10 | 0.271   0.253 | Imp | 0.98 | 0.936 | 0.036 | B-5 | 0.36   | -0.92 (T) | 0.0026  | 1.48E-58 |
|   | rs61748181:T  | 1294166 | missense | EX=2/16   | 0.294  | 0.09    | 0.72 | 0.10 | 0.29 | 0.025   0.031 | Gen | 1.00 | 0.571 | 0.011 | B-5 | 0.47   | -0.72 (T) | -0.0040 | 6.40E-21 |
|   | rs2853669:G   | 1295349 | upstream | DIST=187  | 0.246  | 0.11    | 1.11 | 0.18 | 1.12 | 0.315   0.289 | Gen | 1.00 | 0.830 | 0.037 | B-5 | 0.06   | -1.88 (G) | -       | -        |
|   | rs35226131:T  | 1295373 | upstream | DIST=211  | 0.294  | 0.09    | 0.72 | 0.10 | 0.29 | 0.025   0.031 | Gen | 1.00 | 0.571 | 0.011 | B-5 | 0.26   | -1.13 (T) | -       | -        |
|   | rs35161420:G  | 1295452 | upstream | DIST=290  | 0.296  | 0.09    | 0.71 | 0.10 | 0.29 | 0.025   0.031 | Imp | 0.99 | 0.575 | 0.011 | B-5 | 0.23   | -1.19 (G) | -       | -        |
|   | rs33958877:T  | 1295682 | upstream | DIST=520  | 0.328  | 0.11    | 0.73 | 0.11 | 0.29 | 0.025   0.031 | Gen | 1.00 | 0.616 | 0.011 | B-5 | 0.16   | -1.42 (T) | -       | -        |
|   | rs34768248:A  | 1295716 | upstream | DIST=554  | 0.017  | 0.02    | 0.50 | 0.02 | 0.50 | 0.008   0.015 | Gen | 1.00 | 0.099 | 0.017 | B-5 | 0.79   | 0.26 (A)  | -       | -        |
|   | rs34685900:C  | 1295803 | upstream | DIST=641  | 7.5E-3 | 0.01    | 0.51 | 0.01 | 0.51 | 0.009   0.018 | Gen | 1.00 | 0.042 | 0.014 | B-5 | 0.71   | 0.37 (C)  | -       | -        |
| 7 | rs7712562:G   | 1296072 | upstream | DIST=910  | 9.1E-4 | 6.9E-05 | 1.45 | 0.00 | 1.46 | 0.878   0.843 | Imp | 0.96 | 0.484 | 0.302 | B-5 | 8.5E-5 | 3.93 (A)  | -       | -        |
|   | rs2735940:G   | 1296486 | upstream | DIST=1324 | 0.006  | 0.01    | 1.17 | 0.14 | 1.21 | 0.529   0.507 | Gen | 1.00 | 0.409 | 0.061 | B-5 | 0.65   | 1.54 (C)  | -       | -        |
|   | rs33977403:T  | 1296727 | upstream | DIST=1565 | 0.931  | 0.67    | 1.12 | 0.67 | 1.12 | 0.013   0.014 | Gen | 0.99 | 0.748 | 0.002 | B-5 | 0.25   | -1.91 (T) | -       | -        |

**LD-Block information at the TERT locus, *cise*QTL Expression, UK Biobank Leukocyte telomere length data and conditional analysis on the lead SNP rs2242652 in the primary GWAS samples.** Abbreviations: Top 10 GWAS variants ranked by P value in the discovery GWAS, top 3 in bold print.; SNP:ALT: SNP with alternative allele (reference allele for odds ratio); POS: genomic position on Chr 5; IN: intron, EX: exon; DIST: distance to *TERT* gene; P<sub>gwas</sub>: Association P value in discovery; P<sub>fix</sub>: fixed-effects meta-analysis and P<sub>rand</sub>: random-effects meta-analysis association P value in the combined analysis of stage 1 discovery and stage 2 replication; OR<sub>fix</sub>/rand (CI95): Allelic odds ratio with 95% confidence interval; MAF Ca | Co minor allele freq in cases (HCC) and controls (CIRR); Imputation information: R<sub>sq</sub> (imputation r<sup>2</sup> info score); Annotated LD-Blocks are clusters of strong pairwise LD SNPs and reflect the LD pattern in the discovery GWAS cohort. Conditional Analysis: P<sub>con</sub>: Logistic regression P value of the respective variant conditioned on the allele dosage of the lead variant rs2242652 shown in bold print. Upon conditional analysis, the variant rs2242652 captures the association information in LD block B3 and of the entire *TERT* locus; R<sub>2</sub>Lead: R<sup>2</sup> value of the respective variant in relation to the lead variant rs2242652:A in the discovery sample; Block: LD block assignment based on R<sup>2</sup> value; Expression: CiseQTL P values for cis-eQTL effect on *TERT* expression in blood, from eQTLGen (<https://eqtlgen.org/>). Zscore of effect strength and effect direction of assed allele in brackets. Leukocyte telomere length information obtained from UK Biobank: P<sub>Telo</sub>/Beta: P value and beta of association of the respective variant with leukocyte telomere length; TOP: Top 10 variants ranked by P value in the leukocyte telomere length analysis, top 3 in bold print.

**Supplementary Table 12: *TERT* Locus - conditional analysis in the primary discovery samples**

| <b>Conditioned on rs2242652</b>  | <b>OR (CI 95%)</b>    | <b>P value</b> |
|----------------------------------|-----------------------|----------------|
| rs2242652                        | NA                    | NA             |
| rs10069690                       | OR = 0.90 (0.67-1.21) | 0.485          |
| rs72709458                       | OR = 1.05 (0.75-1.47) |                |
| <b>Conditioned on rs10069690</b> |                       |                |
| rs2242652                        | OR = 0.70 (0.50-0.98) | <b>0.036</b>   |
| rs10069690                       | NA                    | NA             |
| rs72709458                       | OR = 0.91 (0.67-1.24) |                |

Conditional analysis of the top 3 associated variants at the *TERT* locus, located in LD block B3. Upon conditional analysis, the variant rs2242652 captures the association information at the locus, as shown in Supplementary Table 12. The variant rs2242652 remains significantly associated with HCC after conditioning on variant rs10069690.

Supplementary Table 13: Summary of data set used for additional replication of *TERT* variants

| Cohort              | Phenotypes (ICD10 codes)                                                                                         | Characteristics |         |             |        | [Minor allele] frequency (%) |                            |                            |                              |
|---------------------|------------------------------------------------------------------------------------------------------------------|-----------------|---------|-------------|--------|------------------------------|----------------------------|----------------------------|------------------------------|
|                     |                                                                                                                  | HCC (n,%)       | N       | Age* (mean) | % male | <i>TERT</i> [A] rs2242652    | <i>TERT</i> [T] rs10069690 | <i>PNPLA3</i> [G] rs738409 | <i>TM6SF2</i> [T] rs58542926 |
| Stop-HCV            | Cases: C22.0 Liver cell carcinoma (HCC) in HCV-related cirrhosis                                                 | 169 (100)       | 169     | 60          | 73     | 0.151                        | 0.210                      | 0.281                      | 0.080                        |
|                     | Controls: HCV-related cirrhosis without HCC                                                                      |                 | 890     | 56          | 77     | 0.197                        | 0.270                      | 0.253                      | 0.090                        |
| Trépo <i>et al</i>  | Cases: C22.0 HCC in ALD (with advanced fibrosis/cirrhosis)                                                       | 775 (100)       | 775     | 65          | 90     | n/a                          | n/a                        | 0.43                       | 0.13                         |
|                     | Controls: alcohol-related liver disease advanced fibrosis/cirrhosis                                              |                 | 1332    | 56          | 72     | n/a                          | n/a                        | 0.33                       | 0.08                         |
| Zhang <i>et al.</i> | Cases: Chinese patients with C22.0 HCC (patients with HCV were excluded)                                         | 473 (100)       | 473     | 56          | 83     | 0.133                        | 0.135                      | n/a                        | n/a                          |
|                     | Controls: non-cancer individuals from the Physical Examination Center of Haikou People's Hospital                |                 | 564     | 54          | 60     | 0.179                        | 0.171                      | n/a                        | n/a                          |
| Dong <i>et al.</i>  | Cases: male Chinese patients with C22.0 HCC (hepatitis-induced)                                                  | 181 (100)       | 181     | n/a         | 100    | n/a                          | 0.072                      | n/a                        | n/a                          |
|                     | Controls: male, non-cancer individuals from General Hospital of PLA, Beijing                                     |                 | 106     | n/a         | 100    | n/a                          | 0.184                      | n/a                        | n/a                          |
| FinnGen             | Cases: C22 malignant neoplasm of liver and intrahepatic bile duct                                                | 265 (60)        | 442     | 71          | 82     | 0.193                        | 0.253                      | 0.320                      | 0.105                        |
|                     | Controls: FinnGen biobank participants without a diagnosis of primary liver cancer (excluding all other cancers) |                 | 204,070 | 63          | 43     | 0.230                        | 0.296                      | 0.227                      | 0.064                        |
| UKBB**              | Cases: C22 malignant neoplasm of liver and intrahepatic bile duct                                                | 383 (44)        | 874     | 62          | 78     | 0.169                        | 0.226                      | 0.264                      | 0.109                        |
|                     | Controls: UKB participants who did not meet the above definition of a case                                       |                 | 348,465 | 58          | 47     | 0.190                        | 0.258                      | 0.216                      | 0.076                        |
| UKBB*               | Cases: C22.0 Liver cell carcinoma (HCC)                                                                          | 383 (100)       | 383     | 62          | 77     | 0.159                        | 0.202                      | 0.325                      | 0.142                        |
|                     | Controls: UKB participants who did not meet the above definition of a case                                       |                 | 348,956 | 58          | 47     | 0.190                        | 0.258                      | 0.216                      | 0.076                        |
| BBJ Japan***        | Cases: C22.0 Liver cell carcinoma (HCC)                                                                          | 1866 (100)      | 1866    | 68          | 74     | n/a                          | n/a   0.183                | 0.495                      | 0.085                        |
|                     | Controls: BBJ participants who did not meet the above definition of a case                                       |                 |         | 62          | 50     | n/a                          | n/a   0.209                | 0.458                      | 0.078                        |

n/a: data not available; \*Mean age at first event (years) \*\* As UKB data were incorporated into our discovery analysis, further interrogation of liver cancer phenotypes from UKB does not constitute independent validation. \*\*\* Variants rs2242652 and rs10069690 were not available in BioBank Japan summary GWAS data from Ishigaki *et al.*(67) (PMID: 32514122), publicly available from <http://jenger.riken.jp/en/result>; maf data is reported for proxy variants rs72709458 (r<sup>2</sup>=0.973 between rs72709458 and rs2242652, both variants are in high LD).

**Supplementary Table 14: Information for association of *TERT* variants rs2242652, rs10069690 with other cancer from the NHGRI-EBI Catalog of human genome-wide association studies**

| Reported cancer trait<br>NHGRI-EBI -GWAS Catalog | Variant    | P-value               | Effect allele    | Association     | OR   | CI          | First Author  | PubMed ID |
|--------------------------------------------------|------------|-----------------------|------------------|-----------------|------|-------------|---------------|-----------|
| Prostate cancer                                  | rs2242652  | 8 x 10 <sup>-55</sup> | A - minor allele | protective      | 0.88 | [0.86-0.89] | Conti DV      | 33398198  |
| Prostate cancer                                  | rs2242652  | 4 x 10 <sup>-52</sup> | A - minor allele | protective      | 0.85 | [0.84-0.87] | Schumacher    | 29892016  |
| Prostate cancer                                  | rs2242652  | 3 x 10 <sup>-24</sup> | A - minor allele | protective      | 0.87 | [0.84-0.90] | Kote-Jarai Z  | 21743467  |
| Prostate cancer                                  | rs2242652  | 1 x 10 <sup>-15</sup> | A - minor allele | protective      | 0.86 | NR          | Emami NC      | 33293427  |
| Prostate cancer                                  | rs2242652  | 5 x 10 <sup>-12</sup> | A - minor allele | protective      | 0.85 | NR          | Rashkin SR    | 32887889  |
| Prostate cancer                                  | rs2242652  | 8 x 10 <sup>-6</sup>  | A - minor allele | protective      | 0.87 | NR          | Takata R      | 31562322  |
| Uterine leiomyoma                                | rs2242652  | 2 x 10 <sup>-14</sup> | A - minor allele | protective      | 0.90 | [0.88-0.92] | Sakai K       | 31988393  |
| Multiple myeloma                                 | rs2242652  | 1 x 10 <sup>-3</sup>  | A - minor allele | protective      | 0.81 | [0.72-0.92] | Campa D       | 25066524  |
| Breast cancer (ER negative)                      | rs2242652  | 2 x 10 <sup>-14</sup> | A - minor allele | risk increasing | 1.18 | [1.13-1.23] | Couch FJ      | 27117709  |
| Gastric cancer                                   | rs2242652  | 4 x 10 <sup>-4</sup>  | A - minor allele | risk increasing | 1.46 | [1.28-2.92] | Lili M        | 32502020  |
| Skin cancer                                      | rs2242652  | 4 x 10 <sup>-3</sup>  | A - minor allele | risk increasing | 1.50 | [1.14-1.98] | Nan H         | 21116649  |
| Esophageal cancer                                | rs2242652  | 1 x 10 <sup>-3</sup>  | A - minor allele | risk increasing | 1.48 | [1.17-1.89] | Wu Y          | 28060765  |
| Lung cancer                                      | rs2242652  | 0.04                  | A - minor allele | risk increasing | 1.47 | [1.02-2.13] | Gao L         | 25254308  |
|                                                  |            |                       |                  |                 |      |             |               |           |
| Breast cancer (ER negative)                      | rs10069690 | 2 x 10 <sup>-35</sup> | T - minor allele | risk increasing | 1.18 | [1.15-1.21] | Milne RL      | 29058716  |
| Breast cancer                                    | rs10069690 | 2 x 10 <sup>-20</sup> | T - minor allele | risk increasing | 1.06 | [1.05-1.08] | Shu X         | 32139696  |
| Breast cancer                                    | rs10069690 | 8 x 10 <sup>-17</sup> | T - minor allele | risk increasing | 1.06 | [1.04-1.08] | Michailidou K | 29059683  |
| Breast cancer                                    | rs10069690 | 5 x 10 <sup>-12</sup> | T - minor allele | risk increasing | 1.15 | [1.11-1.20] | Garcia-Closas | 23535733  |
| Breast cancer                                    | rs10069690 | 1 x 10 <sup>-10</sup> | T - minor allele | risk increasing | 1.18 | [1.13-1.25] | Haiman CA     | 22037553  |
| Breast cancer                                    | rs10069690 | 7 x 10 <sup>-9</sup>  | T - minor allele | risk increasing | 1.06 | [1.04-1.09] | Michailidou K | 23535729  |
| Breast cancer (ER negative)                      | rs10069690 | 1 x 10 <sup>-7</sup>  | T - minor allele | risk increasing | 1.24 | [1.14-1.34] | Purrington KS | 24325915  |
| Glioblastoma                                     | rs10069690 | 8 x 10 <sup>-74</sup> | T - minor allele | risk increasing | 1.61 | [1.53-1.69] | Melin BS      | 28346443  |
| Glioblastoma                                     | rs10069690 | 3 x 10 <sup>-35</sup> | T - minor allele | risk increasing | 1.64 | [1.52-1.78] | Ostrom QT     | 29743610  |
| Glioma                                           | rs10069690 | 3 x 10 <sup>-66</sup> | T - minor allele | risk increasing | 1.45 | [1.39-1.51] | Melin BS      | 28346443  |
| Glioma                                           | rs10069690 | 8 x 10 <sup>-31</sup> | T - minor allele | risk increasing | 1.49 | [1.39-1.60] | Ostrom QT     | 29743610  |
| Non-glioblastoma glioma                          | rs10069690 | 1 x 10 <sup>-16</sup> | T - minor allele | risk increasing | 1.27 | [1.20-1.34] | Melin BS      | 28346443  |
| Non-glioblastoma glioma                          | rs10069690 | 8 x 10 <sup>-7</sup>  | T - minor allele | risk increasing | 1.25 | [1.15-1.37] | Kinnersley B  | 26424050  |
| Serous ovarian cancer                            | rs10069690 | 1 x 10 <sup>-9</sup>  | T - minor allele | risk increasing | 1.22 | [1.14-1.29] | Phelan CM     | 28346442  |
| Epithelial ovarian cancer                        | rs10069690 | 9 x 10 <sup>-9</sup>  | T - minor allele | risk increasing | 1.14 | [1.10-1.19] | Kuchenbaecker | 25581431  |
| Epithelial ovarian cancer                        | rs10069690 | 3 x 10 <sup>-8</sup>  | T - minor allele | risk increasing | 1.09 | [1.06-1.12] | Phelan CM     | 28346442  |
| Thyroid cancer                                   | rs10069690 | 3 x 10 <sup>-7</sup>  | T - minor allele | risk increasing | 1.20 | [1.12-1.29] | Gudmundsson J | 28195142  |



**Supplementary Table 15: Association between the number of risk alleles in *PNPLA3*, *TM6SF2* and *TERT* and alcohol-related HCC**

| unweighted genetic risk score     | Number of risk alleles (reference: 0-2 risk alleles)<br><i>PNPLA3</i> :rs738409:G; <i>TM6SF2</i> :rs58542926:T; <i>TERT</i> :rs2242652:G |                        |                    |                        |
|-----------------------------------|------------------------------------------------------------------------------------------------------------------------------------------|------------------------|--------------------|------------------------|
|                                   | 3-4 risk alleles                                                                                                                         |                        | 5-6 risk alleles   |                        |
| Adjustments                       | OR (CI95%)                                                                                                                               | P value                | OR (CI95%)         | P value                |
| <b>Discovery (n=1910)</b>         |                                                                                                                                          |                        |                    |                        |
| unadjusted                        | 2.12 (1.76-2.56)                                                                                                                         | 4.88×10 <sup>-15</sup> | 5.24 (2.82-9.77)   | 1.76×10 <sup>-07</sup> |
| pc, sex, age                      | 2.27 (1.83-2.82)                                                                                                                         | 1.36×10 <sup>-15</sup> | 4.97 (2.50-9.91)   | 5.01×10 <sup>-06</sup> |
| <b>Validation UK (n=860)</b>      |                                                                                                                                          |                        |                    |                        |
| unadjusted                        | 3.25 (1.84-5.73)                                                                                                                         | 4.60×10 <sup>-05</sup> | 17.78 (6.38-49.57) | 3.78×10 <sup>-08</sup> |
| pc, sex, age                      | 3.35 (1.84-6.08)                                                                                                                         | 7.60×10 <sup>-05</sup> | 16.13 (5.07-51.31) | 2.00×10 <sup>-06</sup> |
| <b>Validation Germany (n=238)</b> |                                                                                                                                          |                        |                    |                        |
| unadjusted                        | 2.28 (1.08-4.83)                                                                                                                         | 0.031                  | 7.67 (1.69-34.73)  | 8.23×10 <sup>-03</sup> |
| pc, sex, age                      | 2.30 (1.03-5.15)                                                                                                                         | 0.031                  | 8.58 (1.62-45.49)  | 0.012                  |

**Supplementary Table 16: Analysis of factors associated with HCC in patients with alcoholic cirrhosis with liver fat content (FFD%) and leukocyte telomere length in the UK Biobank**

| Variable      | SNP          | Liver fat content |                                   |                               | Leukocyte telomere length |                              |                               | Association with HCC   |                       |                                   |
|---------------|--------------|-------------------|-----------------------------------|-------------------------------|---------------------------|------------------------------|-------------------------------|------------------------|-----------------------|-----------------------------------|
|               |              | N                 | Adjusted Beta (se) <sub>a,b</sub> | Significance (P) <sup>b</sup> | N                         | Adjusted Beta <sup>a,b</sup> | Significance (P) <sup>b</sup> | GWAS P-value           | Per-allele OR (95%CI) | MAF Cases (HCC) / Controls (CIRR) |
| <i>PNPLA3</i> | rs738409:G   | 8,315             | 0.2204                            | 3.39×10 <sup>-61</sup>        | 471,172                   | -0.00013                     | 0.458                         | 7.23×10 <sup>-15</sup> | 1.71 (1.49-1.96)      | 0.48 / 0.35                       |
| <i>TM6SF2</i> | rs58542926:T | 8,315             | 0.2904                            | 5.94×10 <sup>-45</sup>        | 62,296                    | -0.00053                     | 0.475                         | 2.81×10 <sup>-9</sup>  | 1.94 (1.56-2.42)      | 0.15 / 0.08                       |
| <i>TERT</i>   | rs2242652:A  | 8,319             | 0.0209                            | 0.1442                        | 458,714                   | 0.00256                      | 2.12×10 <sup>-44</sup>        | 7.87×10 <sup>-7</sup>  | 0.64 (0.53-0.76)      | 0.13 / 0.19                       |
| <i>TERT</i>   | rs10069690:T |                   |                                   | N/A                           | 471,172                   | 0.00313                      | 4.08×10 <sup>-84</sup>        | 5.73×10 <sup>-6</sup>  | 0.69 (0.58-0.81)      | 0.183 / 0.242                     |
| <i>TERT</i>   | rs72709458:T |                   |                                   | N/A                           | 454,347                   | 0.00344                      | 1.10×10 <sup>-81</sup>        | 3.92×10 <sup>-5</sup>  | 0.70 (0.59-0.83)      | 0.156 / 0.208                     |
| <i>TERT</i>   | rs7726159:A  |                   |                                   | N/A                           | 471,172                   | 0.00476                      | 1.16×10 <sup>-219</sup>       | 5.20×10 <sup>-3</sup>  | 0.81 (0.70-0.94)      | 0.292 / 0.329                     |

SNP: single nucleotide polymorphism, N/A: not analyzed

<sup>a</sup> adjusted for age, gender, principal component 1 to 10.

<sup>b</sup> derived from UK Biobank analysis of >450.000 individuals of European decent

**Supplementary Table 17: Estimates of the proportion of phenotypic variance explained by additive genome-wide significant SNPs for HCC (GWAS discovery cohort)**

| Discovery GWAS cohort<br>n = 1910 |                                     | total variance explained by all SNPs        |                               |                                 |                        | total variance explained by replicated risk variants / remaining variants |                                                                           |                         |                               |                                 |                        |                                                                          |
|-----------------------------------|-------------------------------------|---------------------------------------------|-------------------------------|---------------------------------|------------------------|---------------------------------------------------------------------------|---------------------------------------------------------------------------|-------------------------|-------------------------------|---------------------------------|------------------------|--------------------------------------------------------------------------|
|                                   |                                     | all GWAS-SNPs <sup>a</sup><br>n = 7,585,576 |                               |                                 |                        | GWAS SNPs <sup>b</sup><br>n = 7,583,550                                   | PNPLA3 / TM6SF2 / TERT SNPs <sup>b</sup><br>n = 2026 (LD region variants) |                         |                               |                                 |                        | Proportion of<br>variance<br>explained by<br>replicated<br>risk variants |
| Genetic variance component        |                                     | Sum of V(G1+G2) / Vp                        |                               |                                 |                        | V(G1) / Vp                                                                |                                                                           | V(G2) / Vp              |                               |                                 |                        |                                                                          |
|                                   |                                     | observed<br>scale                           | disease<br>prevalence<br>1% * | disease<br>prevalence<br>2.5% * | LRT                    | observed<br>scale                                                         | LRT                                                                       | observed<br>scale       | disease<br>prevalence<br>1% * | disease<br>prevalence<br>2.5% * | LRT                    |                                                                          |
| Method                            | environmental<br>variance component | $h^2$ (se) <sup>a</sup>                     | $h^2$ (se) <sup>a</sup>       | $h^2$ (se) <sup>a</sup>         | $P^a$                  | $h^2$ (se) <sup>b</sup>                                                   | $P^b$                                                                     | $h^2$ (se) <sup>b</sup> | $h^2$ (se) <sup>b</sup>       | $h^2$ (se) <sup>b</sup>         | $P^b$                  | % of total $h^2$ <sup>c</sup>                                            |
| GCTA-GREML                        | 15 PCs <sup>e</sup>                 | 0.296<br>(0.181)                            | 0.204 (0.107)                 | 0.257 (0.135)                   | $5.55 \times 10^{-17}$ | 0.221<br>(0.181)                                                          | 0.108                                                                     | 0.075<br>(0.022)        | 0.042 (0.013)                 | 0.053 (0.016)                   | $1.32 \times 10^{-17}$ | 25.5%                                                                    |
| GCTA-GREML                        | sex, age, 15 PCs <sup>g</sup>       | 0.243<br>(0.185)                            | 0.176 (0.107)                 | 0.222 (0.136)                   | $3.16 \times 10^{-13}$ | 0.188<br>(0.185)                                                          | 0.152                                                                     | 0.054<br>(0.018)        | 0.030 (0.010)                 | 0.038 (0.013)                   | $3.16 \times 10^{-14}$ | 22.2%                                                                    |

<sup>a</sup> GCTA-GREML estimate of the phenotypic variance ( $h^2$ ) explained by all genotyped and imputed genome-wide SNPs in the discovery cohort (termed the SNP heritability), including the environmental variance component V(e) and the residual variance Vp.

<sup>b</sup> GCTA-GREML estimate of the phenotypic variance ( $h^2$ ) explained by HCC associated genome-wide significant SNPs (V(G2) locating to the *PNPLA3* / *TM6SF2* / *TERT* associated linkage disequilibrium region (LD region) and remaining GWAS variants (V(G1) outside these LD regions).

<sup>c</sup> Percentage of SNP heritability<sub>due to *PNPLA3* / *TM6SF2* / *TERT* variants</sub> calculated by  $\frac{h^2(vc1)}{h^2(vc0)+h^2(vc1)}$ .

<sup>d</sup> GCTA-GREML variance components G2 estimate ( $h^2$ ) after adjustment for lead variants rs738409 in *PNPLA3* / rs58542926 in *TM6SF2* / rs2242652 in *TERT*.

<sup>e</sup> Likelihood model adjustments for top 15 principal components of genetic ancestry (environmental variance component).

<sup>g</sup> Likelihood model adjusted for sex, age and top 15 principal components of genetic ancestry (environmental variance component).

\* Transformed  $h^2$  estimates from heritability on the observed scale (GWAS cohort) to heritability on the liability scale (population) assuming HCC prevalence estimates of 1%-2.5% in patients with alcohol-related liver disease.

Abbreviations: V(G1) = genetic variance component 1; V(G2) = genetic variance component 2; (Vp) residual variance;  $h^2$ , SNP heritability; PC, principal components; se, standard error; LRT, likelihood ratio test; P, likelihood ratio test significance of the predicted change in log likelihood.
